# Supplementary material for: Fungal communities in Florida salt marsh mosquito midguts vary between species and over time but have low structure
Source: Front Immunol. 2025 Sep 23;16:1648091. doi: 10.3389/fimmu.2025.1648091 (PMC12500438; doi:10.3389/fimmu.2025.1648091)
Supplement: Supplementary file 4 [file Table4.xlsx]

## Sheet: Overview
Supplementary File 4: Family level data
Contents
This supplementary data file contains the following data:
A. Raw count data with annotation
B. Annotated data with identification of putative contaminants and reads from non-fungal zOTUs
C. Final data used in analysis

## Sheet: A. Raw count data
otu name	Taxonomy	Percent Homology	evalue	bitscore	A020.O	A021.1.O	A021.2.O	A021.3.O	A022.O	A024.1.O	A024.2.O	A024.3.O	A025.1.O	A025.2.O	A028.O	A032.O	A034.O	A045.O	A046.O	B011.O	B030.O	B098.O	B131.O	B165.O	B179.O	B224.O	B299.O	B302.O	B320.O	B332.O	B343.O	B373.O	B399.O	B424.O	C007.1.M	C007.2.M	C007.3.M	C008.M	C009.1.M	C009.2.M	C010.M	C015.M	C016.M	C017.M	C018.M	C019.M	D008.M	D017.M	D020.M
Zotu1	___ab263119.1__gi:109452377_ ;k__fungi;p__basidiomycota;c__microbotryomycetes;o__sporidiobolales;f__sporidiobolaceae;g__rhodotorula;s__rhodotorula lamellibrachiae; subphylum__pucciniomycotina;subkingdom__dikarya;superkingdom__eukaryota;	95	2.17478e-17	95.0615	571	475	455	421	480	74762	72989	78958	68301	80124	411	393	482	392	493	379	70033	362	57156	374	478	421	380	72576	246	411	189	67068	300	270	368	417	542	472	441	542	548	78749	54518	71104	30006	74221	462	67480	42555
Zotu2	___ab263119.1__gi:109452377_ ;k__fungi;p__basidiomycota;c__microbotryomycetes;o__sporidiobolales;f__sporidiobolaceae;g__rhodotorula;s__rhodotorula lamellibrachiae; subphylum__pucciniomycotina;subkingdom__dikarya;superkingdom__eukaryota;	95	2.17478e-17	95.0615	22	19	16	17	23	340	549	886	115	509	19	17	20	21	27	19	5271	12	203	16	26	12	21	141	13	15	9	211	16	9	23	26	35	29	23	28	14	951	2001	208	48124	495	17	108	543
Zotu3	___ab263119.1__gi:109452377_ ;k__fungi;p__basidiomycota;c__microbotryomycetes;o__sporidiobolales;f__sporidiobolaceae;g__rhodotorula;s__rhodotorula lamellibrachiae; subphylum__pucciniomycotina;subkingdom__dikarya;superkingdom__eukaryota;	90.1408	6.53932e-18	96.8649	14	9	9	9	8	22	2093	567	580	634	23	6	14	14	18	6	27	6	719	9	13	9	10	10	9	11	3	2187	14	11	13	14	12	18	10	12	12	22	18739	164	19	6373	13	1179	905
Zotu4	culex pilosus ;k__metazoa;p__arthropoda;c__insecta;o__diptera;f__culicidae;g__culex;s__culex pilosus;subgenus mochlostyrax;tribe__culicini;subfamily__culicinae;superfamily__culicoidea;infraorder__culicomorpha;suborder__nematocera;infraclass endopterygota;subclass neoptera;superclass hexapoda;superkingdom__eukaryota	93.1507	6.38755e-20	104.078	25601	33134	23496	37061	30248	114	131	154	116	121	138	156	160	116	176	18611	150	125	120	117	19151	160	4036	135	112	24084	65	117	129	15391	27625	28419	10478	177	170	180	166	126	129	118	122	115	161	127	42
Zotu5	culex pilosus ;k__metazoa;p__arthropoda;c__insecta;o__diptera;f__culicidae;g__culex;s__culex pilosus;subgenus mochlostyrax;tribe__culicini;subfamily__culicinae;superfamily__culicoidea;infraorder__culicomorpha;suborder__nematocera;infraclass endopterygota;subclass neoptera;superclass hexapoda;superkingdom__eukaryota	93.1507	6.4014e-20	104.078	21313	11915	22917	1585	12500	62	86	69	57	83	100	94	103	72	126	4824	100	94	78	77	2280	94	27827	68	64	11116	38	69	39	18556	6690	4899	37965	124	95	113	104	71	97	89	75	70	107	53	34
Zotu6	___ab263119.1__gi:109452377_ ;k__fungi;p__basidiomycota;c__microbotryomycetes;o__sporidiobolales;f__sporidiobolaceae;g__rhodotorula;s__rhodotorula lamellibrachiae; subphylum__pucciniomycotina;subkingdom__dikarya;superkingdom__eukaryota;	95	2.17478e-17	95.0615	5	5	4	6	3	74	145	81	47	2351	3	3	7	4	11	5	65	4	10952	2	8	6	4	72	4	3	4	60	2	3	5	1	3	8	1	7	5	290	125	55	150	62	7	307	821
Zotu7	___ab263119.1__gi:109452377_ ;k__fungi;p__basidiomycota;c__microbotryomycetes;o__sporidiobolales;f__sporidiobolaceae;g__rhodotorula;s__rhodotorula lamellibrachiae; subphylum__pucciniomycotina;subkingdom__dikarya;superkingdom__eukaryota;	95	2.34704e-17	95.0615	3	3	5	5	11	29	2444	474	554	543	7	9	6	5	9	4	38	2	464	7	6	7	8	28	5	5	3	1315	3	4	5	7	15	10	4	5	6	47	5750	99	39	2533	3	529	180
Zotu8	culex pilosus ;k__metazoa;p__arthropoda;c__insecta;o__diptera;f__culicidae;g__culex;s__culex pilosus;subgenus mochlostyrax;tribe__culicini;subfamily__culicinae;superfamily__culicoidea;infraorder__culicomorpha;suborder__nematocera;infraclass endopterygota;subclass neoptera;superclass hexapoda;superkingdom__eukaryota	93.1507	6.4014e-20	104.078	8498	226	1626	1755	54	6	10	6	7	15	7	5	9	9	8	44	9	8	10	5	2296	8	74	12	1	60	6	8	11	181	44	5364	123	20	10	5	6	9	16	7	7	3	11	7	3
Zotu9	thinophilus nitens ;k__metazoa;p__arthropoda;c__insecta;o__diptera;f__dolichopodidae;g__thinophilus;s__thinophilus nitens;subfamily__hydrophorinae;superfamily__empidoidea;infraorder__muscomorpha;suborder__brachycera;infraclass endopterygota;subclass neoptera;superclass hexapoda;superkingdom__eukaryota	92.8571	1.7474	39.157	21	25	24	106	321	1	1	2	0	0	0	0	0	1	0	11	0	1	0	1	9	2	5125	0	1	12	0	0	1	7	9	144	3	2	0	0	2	1	0	0	2	0	1	1	0
Zotu10	thinophilus nitens ;k__metazoa;p__arthropoda;c__insecta;o__diptera;f__dolichopodidae;g__thinophilus;s__thinophilus nitens;subfamily__hydrophorinae;superfamily__empidoidea;infraorder__muscomorpha;suborder__brachycera;infraclass endopterygota;subclass neoptera;superclass hexapoda;superkingdom__eukaryota	92.8571	1.7474	39.157	2	16	29	1	1	0	1	1	0	0	0	0	1	0	0	0	1	0	3	0	0	0	5264	1	1	0	0	0	0	0	2	0	1	0	0	0	0	1	2	1	0	0	0	0	0
Zotu11	culex pilosus ;k__metazoa;p__arthropoda;c__insecta;o__diptera;f__culicidae;g__culex;s__culex pilosus;subgenus mochlostyrax;tribe__culicini;subfamily__culicinae;superfamily__culicoidea;infraorder__culicomorpha;suborder__nematocera;infraclass endopterygota;subclass neoptera;superclass hexapoda;superkingdom__eukaryota	93.1507	6.38755e-20	104.078	69	58	51	48	59	4	9	6	3	12	10	4	10	8	6	42	4	5	5	6	17381	2	22	3	4	45	3	6	8	30	45	42	42	8	6	8	6	8	10	2	3	9	9	7	3
Zotu12	culex nigripalpus ;k__metazoa;p__arthropoda;c__insecta;o__diptera;f__culicidae;g__culex;s__culex nigripalpus;subgenus culex;tribe__culicini;subfamily__culicinae;superfamily__culicoidea;infraorder__culicomorpha;suborder__nematocera;infraclass endopterygota;subclass neoptera;superclass hexapoda;superkingdom__eukaryota	95.5426	0	827.229	14	10	4	3	6	6	6	12	7	5	231	42	64	390	392	6	7	18	3	20	6	330	2	9	2	12	3	8	2476	4	8	10	8	251	34	33	222	6	6	4	4	12	38	8	1
Zotu13	culex nigripalpus ;k__metazoa;p__arthropoda;c__insecta;o__diptera;f__culicidae;g__culex;s__culex nigripalpus;subgenus culex;tribe__culicini;subfamily__culicinae;superfamily__culicoidea;infraorder__culicomorpha;suborder__nematocera;infraclass endopterygota;subclass neoptera;superclass hexapoda;superkingdom__eukaryota	95.7364	0	834.443	5	1	8	7	4	5	3	6	5	2	22	196	13052	27	27	4	1	69	4	52	5	21	5	1	4	6	4	3	28	4	4	8	4	2427	65	219	168	6	5	5	2	5	26	3	5
Zotu14	culex nigripalpus ;k__metazoa;p__arthropoda;c__insecta;o__diptera;f__culicidae;g__culex;s__culex nigripalpus;subgenus culex;tribe__culicini;subfamily__culicinae;superfamily__culicoidea;infraorder__culicomorpha;suborder__nematocera;infraclass endopterygota;subclass neoptera;superclass hexapoda;superkingdom__eukaryota	94.8077	0	818.212	10	10	10	4	15	4	8	7	9	6	15	40	934	87	18	7	5	73	8	26	11	35	5	7	5	11	4	5	11	3	3	2	9	24051	357	52	123	3	7	6	10	0	25	4	2
Zotu15	culex nigripalpus ;k__metazoa;p__arthropoda;c__insecta;o__diptera;f__culicidae;g__culex;s__culex nigripalpus;subgenus culex;tribe__culicini;subfamily__culicinae;superfamily__culicoidea;infraorder__culicomorpha;suborder__nematocera;infraclass endopterygota;subclass neoptera;superclass hexapoda;superkingdom__eukaryota	94.5946	0	805.589	7	8	9	5	9	3	2	5	4	3	21	22	35	13	26	10	6	20	7	16	9	55	7	5	6	9	5	6	17	4	4	7	6	20	16	18	28	5	6	4	4	6	24	8	1
Zotu16	culex pilosus ;k__metazoa;p__arthropoda;c__insecta;o__diptera;f__culicidae;g__culex;s__culex pilosus;subgenus mochlostyrax;tribe__culicini;subfamily__culicinae;superfamily__culicoidea;infraorder__culicomorpha;suborder__nematocera;infraclass endopterygota;subclass neoptera;superclass hexapoda;superkingdom__eukaryota	93.1507	6.42911e-20	104.078	24	3200	32	22	27	4	2	5	7	8	7	9	8	7	10	18	4	6	9	5	30	3	20	7	8	32	3	9	11	196	26	93	4326	13	11	10	9	5	1	2	4	2	14	5	3
Zotu17	culex nigripalpus ;k__metazoa;p__arthropoda;c__insecta;o__diptera;f__culicidae;g__culex;s__culex nigripalpus;subgenus culex;tribe__culicini;subfamily__culicinae;superfamily__culicoidea;infraorder__culicomorpha;suborder__nematocera;infraclass endopterygota;subclass neoptera;superclass hexapoda;superkingdom__eukaryota	95.7282	0	834.443	6	12	8	11	10	9	8	6	8	6	278	3235	387	188	394	2	4	8483	4	38	9	23	5	7	3	9	2	3	111	6	9	5	12	8019	551	33	190	8	6	13	7	5	136	2	3
Zotu18	culex nigripalpus ;k__metazoa;p__arthropoda;c__insecta;o__diptera;f__culicidae;g__culex;s__culex nigripalpus;subgenus culex;tribe__culicini;subfamily__culicinae;superfamily__culicoidea;infraorder__culicomorpha;suborder__nematocera;infraclass endopterygota;subclass neoptera;superclass hexapoda;superkingdom__eukaryota	96.1315	0	848.87	5	6	7	4	7	2	6	4	2	2	17	99	21	13648	30	4	4	58	3	17	4	26	4	4	2	3	3	6	33	4	6	9	6	33	35	19	38	4	4	3	3	7	19	4	2
Zotu19	culex nigripalpus ;k__metazoa;p__arthropoda;c__insecta;o__diptera;f__culicidae;g__culex;s__culex nigripalpus;subgenus culex;tribe__culicini;subfamily__culicinae;superfamily__culicoidea;infraorder__culicomorpha;suborder__nematocera;infraclass endopterygota;subclass neoptera;superclass hexapoda;superkingdom__eukaryota	93.9922	0	787.555	10	13	9	4	7	7	4	6	5	5	19	71	78	50	13	3	4	70	2	20	5	97	3	5	3	6	3	6	6	6	4	11	6	19	20	28	1049	4	5	1	7	3	751	3	1
Zotu20	culex pilosus ;k__metazoa;p__arthropoda;c__insecta;o__diptera;f__culicidae;g__culex;s__culex pilosus;subgenus mochlostyrax;tribe__culicini;subfamily__culicinae;superfamily__culicoidea;infraorder__culicomorpha;suborder__nematocera;infraclass endopterygota;subclass neoptera;superclass hexapoda;superkingdom__eukaryota	93.1507	6.44297e-20	104.078	962	39	21	21	21	4	5	7	5	3	3	4	6	0	8	9571	1	2	3	0	11	3	14	6	0	42	4	3	1	17	37	17	24	3	10	3	5	0	4	4	6	0	7	2	1
Zotu21	culex nigripalpus ;k__metazoa;p__arthropoda;c__insecta;o__diptera;f__culicidae;g__culex;s__culex nigripalpus;subgenus culex;tribe__culicini;subfamily__culicinae;superfamily__culicoidea;infraorder__culicomorpha;suborder__nematocera;infraclass endopterygota;subclass neoptera;superclass hexapoda;superkingdom__eukaryota	97.8682	0	874.117	10	16	11	7	13	7	8	7	13	11	249	451	559	2807	244	10	9	654	12	40	13	97	9	8	3	18	4	6	1287	6	8	12	14	396	85	241	25490	10	10	5	5	12	419	10	6
Zotu22	culex nigripalpus ;k__metazoa;p__arthropoda;c__insecta;o__diptera;f__culicidae;g__culex;s__culex nigripalpus;subgenus culex;tribe__culicini;subfamily__culicinae;superfamily__culicoidea;infraorder__culicomorpha;suborder__nematocera;infraclass endopterygota;subclass neoptera;superclass hexapoda;superkingdom__eukaryota	95.5684	0	838.049	3	3	1	5	2	6	3	2	2	1	878	56	35	298	549	5	5	442	1	33	5	140	1	3	1	4	2	4	276	2	4	5	6	74	227	21	10	2	3	3	3	4	8344	5	2
Zotu23	culex nigripalpus ;k__metazoa;p__arthropoda;c__insecta;o__diptera;f__culicidae;g__culex;s__culex nigripalpus;subgenus culex;tribe__culicini;subfamily__culicinae;superfamily__culicoidea;infraorder__culicomorpha;suborder__nematocera;infraclass endopterygota;subclass neoptera;superclass hexapoda;superkingdom__eukaryota	95.0096	0	830.836	10	4	12	7	4	5	4	2	3	1	264	82	153	36	15610	4	0	37	3	36	7	26	2	5	9	6	3	2	388	6	6	4	3	227	123	34	32	8	6	4	6	5	45	4	1
Zotu24	culex nigripalpus ;k__metazoa;p__arthropoda;c__insecta;o__diptera;f__culicidae;g__culex;s__culex nigripalpus;subgenus culex;tribe__culicini;subfamily__culicinae;superfamily__culicoidea;infraorder__culicomorpha;suborder__nematocera;infraclass endopterygota;subclass neoptera;superclass hexapoda;superkingdom__eukaryota	95.7611	0	841.656	2	4	1	4	2	0	7	7	5	0	174	75	160	51	6154	1	5	645	3	719	3	12	2	1	1	6	1	3	188	1	2	4	4	33	133	64	30	3	0	1	2	2	886	0	0
Zotu25	thinophilus nitens ;k__metazoa;p__arthropoda;c__insecta;o__diptera;f__dolichopodidae;g__thinophilus;s__thinophilus nitens;subfamily__hydrophorinae;superfamily__empidoidea;infraorder__muscomorpha;suborder__brachycera;infraclass endopterygota;subclass neoptera;superclass hexapoda;superkingdom__eukaryota	92.8571	1.7474	39.157	1	0	1	3	14	0	0	0	0	0	0	0	0	0	1	0	1	0	0	0	0	0	9	0	0	9	0	1	0	0	1151	0	0	1	0	0	0	0	0	0	0	0	0	0	0
Zotu26	culex nigripalpus ;k__metazoa;p__arthropoda;c__insecta;o__diptera;f__culicidae;g__culex;s__culex nigripalpus;subgenus culex;tribe__culicini;subfamily__culicinae;superfamily__culicoidea;infraorder__culicomorpha;suborder__nematocera;infraclass endopterygota;subclass neoptera;superclass hexapoda;superkingdom__eukaryota	96.5116	0	854.28	4	2	5	5	1	1	4	2	1	1	19	33	417	319	65	1	2	102	1	41	3	268	1	1	3	6	0	2	74	1	7	4	5	308	208	6860	447	5	2	0	1	3	114	4	0
Zotu27	___ef405864.1__gi:125661831_ ;k__fungi;p__ascomycota;c__dothideomycetes;o__cladosporiales;f__cladosporiaceae;g__cladosporium;s__cladosporium cladosporioides; subclass hypocreomycetidae;subphylum__pezizomycotina;subkingdom__dikarya;superkingdom__eukaryota;species__gondwanamyces;subclass hypocreomycetidae;subphylum__pezizomycotina;subkingdom__dikarya;superkingdom__eukaryota;species__gondwanamyces;s…	100	3.34895e-114	416.061	0	0	0	0	2	0	0	0	0	0	0	1	1	0	1	2	0	0	1	0	1	0	0	0	0	2	0	0	1	0	285	153	92	1	75	0	2	22	0	2	2	0	12	4	21
Zotu28	thinophilus nitens ;k__metazoa;p__arthropoda;c__insecta;o__diptera;f__dolichopodidae;g__thinophilus;s__thinophilus nitens;subfamily__hydrophorinae;superfamily__empidoidea;infraorder__muscomorpha;suborder__brachycera;infraclass endopterygota;subclass neoptera;superclass hexapoda;superkingdom__eukaryota	92.8571	1.7474	39.157	0	0	1	0	3	1	0	0	0	0	0	0	1	0	1	0	0	0	1	0	0	0	20	0	0	1	0	0	1	0	1058	0	0	0	0	0	0	0	0	0	0	0	0	0	0
Zotu29	___fn298654.1__gi:227284155_ ;k__fungi;p__basidiomycota;c__tremellomycetes;o__tremellales;f__cryptococcaceae;g__cryptococcus;s__cryptococcus wieringae; subphylum__agaricomycotina;subkingdom__dikarya;superkingdom__eukaryota;	89.7959	2.13647e-65	253.758	0	1	609	0	0	0	0	0	1	0	0	0	0	0	0	1	0	0	0	1	1	0	0	1	0	0	0	0	0	0	0	1	0	0	0	0	1	0	0	1	0	0	2	0	0
Zotu30	culex nigripalpus ;k__metazoa;p__arthropoda;c__insecta;o__diptera;f__culicidae;g__culex;s__culex nigripalpus;subgenus culex;tribe__culicini;subfamily__culicinae;superfamily__culicoidea;infraorder__culicomorpha;suborder__nematocera;infraclass endopterygota;subclass neoptera;superclass hexapoda;superkingdom__eukaryota	98.6408	0	893.954	13	12	5	7	11	7	5	12	9	9	498	804	57	41	137	9	7	907	9	454	15	17744	5	4	7	8	2	7	594	8	3	7	12	42	22	107	244	5	4	8	10	6	110	4	1
Zotu31	culex nigripalpus ;k__metazoa;p__arthropoda;c__insecta;o__diptera;f__culicidae;g__culex;s__culex nigripalpus;subgenus culex;tribe__culicini;subfamily__culicinae;superfamily__culicoidea;infraorder__culicomorpha;suborder__nematocera;infraclass endopterygota;subclass neoptera;superclass hexapoda;superkingdom__eukaryota	96.3107	0	852.476	3	3	2	0	0	3	0	0	1	4	94	523	25	220	55	4	4	48	3	13	3	13	4	4	3	3	2	1	48	2	4	3	1	36	79	86	36	5	1	1	4	3	24	3	1
Zotu32	___dq826553.1__gi:112363302_ ;k__fungi;p__basidiomycota;c__agaricomycetes;o__hymenochaetales;f__hymenochaetales;g__resinicium;s__resinicium monticola;superkingdom__eukaryota;subkingdom__dikarya	89.5833	4.5392e-81	306.957	0	0	0	0	0	0	0	1	0	0	0	0	1	1	1	0	0	0	0	1	0	0	0	1	0	0	626	0	0	0	0	0	1	0	0	1	0	0	0	1	0	0	0	2	0
Zotu33	culex pilosus ;k__metazoa;p__arthropoda;c__insecta;o__diptera;f__culicidae;g__culex;s__culex pilosus;subgenus mochlostyrax;tribe__culicini;subfamily__culicinae;superfamily__culicoidea;infraorder__culicomorpha;suborder__nematocera;infraclass endopterygota;subclass neoptera;superclass hexapoda;superkingdom__eukaryota	93.1507	6.45683e-20	104.078	149	16	9	7	23	0	0	1	2	1	0	2	2	1	6	4512	1	2	2	2	9	2	17	2	0	26	1	1	1	7	13	19	17	3	3	2	1	1	0	1	3	1	0	0	0
Zotu34	culex nigripalpus ;k__metazoa;p__arthropoda;c__insecta;o__diptera;f__culicidae;g__culex;s__culex nigripalpus;subgenus culex;tribe__culicini;subfamily__culicinae;superfamily__culicoidea;infraorder__culicomorpha;suborder__nematocera;infraclass endopterygota;subclass neoptera;superclass hexapoda;superkingdom__eukaryota	94.2197	0	811.901	3	0	0	1	3	1	0	0	0	0	4551	21	105	12	6	2	1	3	0	121	2	4	0	1	3	6	0	1	79	1	2	0	1	5	18	7	6	1	2	0	0	2	8	1	1
Zotu35	culex nigripalpus ;k__metazoa;p__arthropoda;c__insecta;o__diptera;f__culicidae;g__culex;s__culex nigripalpus;subgenus culex;tribe__culicini;subfamily__culicinae;superfamily__culicoidea;infraorder__culicomorpha;suborder__nematocera;infraclass endopterygota;subclass neoptera;superclass hexapoda;superkingdom__eukaryota	96.1464	0	854.28	7	3	1	2	1	1	4	5	3	4	7135	101	32	97	175	2	2	48	4	40	4	46	2	0	2	4	1	1	16	2	1	3	4	96	819	16	13	2	4	1	2	4	204	0	2
Zotu36	culex nigripalpus ;k__metazoa;p__arthropoda;c__insecta;o__diptera;f__culicidae;g__culex;s__culex nigripalpus;subgenus culex;tribe__culicini;subfamily__culicinae;superfamily__culicoidea;infraorder__culicomorpha;suborder__nematocera;infraclass endopterygota;subclass neoptera;superclass hexapoda;superkingdom__eukaryota	94.971	0	812.802	1	2	4	0	1	0	4	0	1	0	19	5	10	29	11	0	0	8	2	5	2	37	1	1	0	2	0	1	30	3	0	2	4	14	6	15	30	1	0	2	2	1	4	0	1
Zotu37	culex nigripalpus ;k__metazoa;p__arthropoda;c__insecta;o__diptera;f__culicidae;g__culex;s__culex nigripalpus;subgenus culex;tribe__culicini;subfamily__culicinae;superfamily__culicoidea;infraorder__culicomorpha;suborder__nematocera;infraclass endopterygota;subclass neoptera;superclass hexapoda;superkingdom__eukaryota	95.0287	0	833.541	5	4	2	8	5	1	3	4	0	2	9843	199	109	138	1348	10	3	46	2	40	2	14	3	6	0	3	0	5	164	2	1	2	5	63	271	18	22	3	3	1	2	2	302	4	2
Zotu39	culex nigripalpus ;k__metazoa;p__arthropoda;c__insecta;o__diptera;f__culicidae;g__culex;s__culex nigripalpus;subgenus culex;tribe__culicini;subfamily__culicinae;superfamily__culicoidea;infraorder__culicomorpha;suborder__nematocera;infraclass endopterygota;subclass neoptera;superclass hexapoda;superkingdom__eukaryota	97.2868	0	858.788	8	4	5	4	5	5	4	1	3	1	9	103	77	11	9	6	0	13	4	21	2	35	2	3	3	2	3	2	9	2	3	4	4	8	14	38	258	3	5	2	3	2	10916	3	3
Zotu40	culex nigripalpus ;k__metazoa;p__arthropoda;c__insecta;o__diptera;f__culicidae;g__culex;s__culex nigripalpus;subgenus culex;tribe__culicini;subfamily__culicinae;superfamily__culicoidea;infraorder__culicomorpha;suborder__nematocera;infraclass endopterygota;subclass neoptera;superclass hexapoda;superkingdom__eukaryota	95.3398	0	829.033	1	0	0	3	2	0	1	1	2	2	13	36	2005	53	27	0	0	10	0	9	1	11	1	1	0	0	0	0	21	0	0	0	2	82	48	1	23	1	2	0	0	1	24	1	0
Zotu41	___ay341338.1__gi:33356633_ ;k__fungi;p__ascomycota;c__taphrinomycetes;o__taphrinales;f__taphrinaceae;g__taphrina;s__taphrina kruchii;subphylum__taphrinomycotina;subkingdom__dikarya;superkingdom__eukaryota	86.4662	1.79099e-80	305.154	0	0	0	0	0	0	1	0	0	0	0	0	1	0	0	0	0	0	0	0	0	0	0	0	0	0	0	0	0	0	5	14	0	0	0	0	332	0	1	0	0	1	0	0	1
Zotu42	culex nigripalpus ;k__metazoa;p__arthropoda;c__insecta;o__diptera;f__culicidae;g__culex;s__culex nigripalpus;subgenus culex;tribe__culicini;subfamily__culicinae;superfamily__culicoidea;infraorder__culicomorpha;suborder__nematocera;infraclass endopterygota;subclass neoptera;superclass hexapoda;superkingdom__eukaryota	95.534	0	829.934	4	1	3	2	4	2	2	3	4	2	2642	394	43	348	100	2	1	85	4	24	0	1025	0	0	4	1	0	3	46	1	1	1	3	390	11	79	281	0	0	4	5	5	256	0	1
Zotu43	culex nigripalpus ;k__metazoa;p__arthropoda;c__insecta;o__diptera;f__culicidae;g__culex;s__culex nigripalpus;subgenus culex;tribe__culicini;subfamily__culicinae;superfamily__culicoidea;infraorder__culicomorpha;suborder__nematocera;infraclass endopterygota;subclass neoptera;superclass hexapoda;superkingdom__eukaryota	94.9904	0	825.426	0	1	2	2	1	2	1	1	2	0	68	148	25	7	25	0	1	257	4	13	2	7	0	1	2	4	2	0	6	0	1	0	1	5049	70	8	13	2	3	2	0	1	6	2	0
Zotu44	___aj300334.1__gi:13539171_ ;k__fungi;p__ascomycota;c__dothideomycetes;o__cladosporiales;f__cladosporiaceae;g__cladosporium;s__cladosporium cladosporioides; subclass hypocreomycetidae;subphylum__pezizomycotina;subkingdom__dikarya;superkingdom__eukaryota;species__gondwanamyces;subclass hypocreomycetidae;subphylum__pezizomycotina;subkingdom__dikarya;superkingdom__eukaryota;species__gondwanamyces;su…	100	9.64311e-115	417.864	0	1	0	0	1	1	1	0	0	0	23	25	2	10	0	6	0	5	0	0	8	9	0	0	0	10	0	0	1	0	16	40	9	19	56	2	0	25	1	1	1	15	0	4	8
Zotu45	culex nigripalpus ;k__metazoa;p__arthropoda;c__insecta;o__diptera;f__culicidae;g__culex;s__culex nigripalpus;subgenus culex;tribe__culicini;subfamily__culicinae;superfamily__culicoidea;infraorder__culicomorpha;suborder__nematocera;infraclass endopterygota;subclass neoptera;superclass hexapoda;superkingdom__eukaryota	94.5946	0	806.49	4	2	3	2	6	2	6	2	2	2	51	53	67	16	15	3	2	55	0	20	2	944	1	0	1	6	0	4	17	2	4	2	4	22	17	83	62	1	2	0	3	0	61	1	0
Zotu46	culex nigripalpus ;k__metazoa;p__arthropoda;c__insecta;o__diptera;f__culicidae;g__culex;s__culex nigripalpus;subgenus culex;tribe__culicini;subfamily__culicinae;superfamily__culicoidea;infraorder__culicomorpha;suborder__nematocera;infraclass endopterygota;subclass neoptera;superclass hexapoda;superkingdom__eukaryota	97.6744	0	866.903	2	6	0	2	1	1	3	4	1	3	5	7153	209	64	13	4	3	9	8	26	2	54	3	1	0	3	0	1	16	3	2	3	3	30	30	26	15	3	2	3	1	2	50	4	0
Zotu47	culex nigripalpus ;k__metazoa;p__arthropoda;c__insecta;o__diptera;f__culicidae;g__culex;s__culex nigripalpus;subgenus culex;tribe__culicini;subfamily__culicinae;superfamily__culicoidea;infraorder__culicomorpha;suborder__nematocera;infraclass endopterygota;subclass neoptera;superclass hexapoda;superkingdom__eukaryota	99.2263	0	909.282	16	4	14	10	6	8	8	13	5	9	93	78	80	444	184	11	11	1099	9	172	10	464	6	6	10	11	6	12	12794	1	9	14	13	50	1740	157	203	6	6	6	9	10	77	6	2
Zotu48	culex nigripalpus ;k__metazoa;p__arthropoda;c__insecta;o__diptera;f__culicidae;g__culex;s__culex nigripalpus;subgenus culex;tribe__culicini;subfamily__culicinae;superfamily__culicoidea;infraorder__culicomorpha;suborder__nematocera;infraclass endopterygota;subclass neoptera;superclass hexapoda;superkingdom__eukaryota	95.3668	0	827.229	7	4	7	1	5	5	0	1	5	5	23	53	181	49	15	0	2	19	1	133	4	10	1	0	2	4	3	2	220	4	2	0	7	208	441	98	117	1	2	1	2	1	8	2	1
Zotu49	culex nigripalpus ;k__metazoa;p__arthropoda;c__insecta;o__diptera;f__culicidae;g__culex;s__culex nigripalpus;subgenus culex;tribe__culicini;subfamily__culicinae;superfamily__culicoidea;infraorder__culicomorpha;suborder__nematocera;infraclass endopterygota;subclass neoptera;superclass hexapoda;superkingdom__eukaryota	95.1644	0	821.819	4	6	3	3	5	2	3	1	0	1	274	40	146	14	157	3	0	404	3	44	3	161	6	1	2	3	0	2	105	1	3	5	3	10	39	110	21	1	3	1	2	2	300	0	1
Zotu50	___ay046207.1__gi:31746865_ ;k__fungi;p__ascomycota;c__saccharomycetes;o__saccharomycetales;f__saccharomycetaceae;g__lachancea;s__lachancea thermotolerans;subphylum__saccharomycotina;subkingdom__dikarya;superkingdom__eukaryota	99.2032	9.22671e-123	444.915	1	0	0	0	0	0	1	0	0	0	0	0	1	0	0	0	0	0	0	1	0	0	0	2	0	0	0	0	0	0	0	0	0	0	0	0	2	2	0	0	1	2	0	0	8
Zotu51	picea glauca ;k__viridiplantae;p__streptophyta;c__pinopsida;o__pinales;f__pinaceae;g__picea;s__picea glauca; subclass pinidae;subphylum__streptophytina;superkingdom__eukaryota;	92	3.50209	37.3537	0	0	0	0	0	0	0	0	0	0	0	0	28	0	62	0	0	81	0	0	0	0	0	1	0	0	0	0	0	0	0	0	0	0	0	34	52	0	0	0	0	0	0	0	0
Zotu52	___aj437693.1__gi:28865716_ ;k__fungi;p__basidiomycota;c__malasseziomycetes;o__malasseziales;f__malasseziaceae;g__malassezia;s__malassezia globosa;subphylum__ustilaginomycotina;subkingdom__dikarya;superkingdom__eukaryota	96.3636	2.17565e-150	536.887	0	0	3	0	1	0	0	0	0	0	6	0	0	3	1	0	0	0	1	0	1	0	0	0	1	0	0	0	0	0	0	0	1	0	0	0	0	1	0	0	0	0	1	0	0
Zotu54	___eu030147.1__gi:154431721_ ;k__fungi;p__basidiomycota;c__agaricomycetes;o__polyporales;f__polyporaceae;g__coriolopsis;s__coriolopsis caperata; subphylum__agaricomycotina;subkingdom__dikarya;superkingdom__eukaryota;	99.5169	5.58684e-100	370.075	40	0	4	0	12	1	0	0	5	0	0	16	75	0	31	0	1	9	0	27	0	0	0	11	0	40	0	1	10	5	0	0	0	0	0	0	0	1	0	0	0	0	0	0	0
Zotu55	culex nigripalpus ;k__metazoa;p__arthropoda;c__insecta;o__diptera;f__culicidae;g__culex;s__culex nigripalpus;subgenus culex;tribe__culicini;subfamily__culicinae;superfamily__culicoidea;infraorder__culicomorpha;suborder__nematocera;infraclass endopterygota;subclass neoptera;superclass hexapoda;superkingdom__eukaryota	95.3846	0	834.443	1	1	2	1	2	2	3	2	1	3	25	8	94	14	9	1	2	28	0	12	4	133	0	2	3	3	0	0	68	0	1	2	0	8	3177	206	33	0	0	0	0	1	129	0	0
Zotu56	culex nigripalpus ;k__metazoa;p__arthropoda;c__insecta;o__diptera;f__culicidae;g__culex;s__culex nigripalpus;subgenus culex;tribe__culicini;subfamily__culicinae;superfamily__culicoidea;infraorder__culicomorpha;suborder__nematocera;infraclass endopterygota;subclass neoptera;superclass hexapoda;superkingdom__eukaryota	95.3488	0	823.622	0	3	2	0	0	0	2	4	0	1	22	44	211	8	17	1	1	201	1	5	1	7	0	3	4	1	0	3	10	1	3	5	1	412	36	10	44	1	1	3	3	2	15	1	0
Zotu57	culex nigripalpus ;k__metazoa;p__arthropoda;c__insecta;o__diptera;f__culicidae;g__culex;s__culex nigripalpus;subgenus culex;tribe__culicini;subfamily__culicinae;superfamily__culicoidea;infraorder__culicomorpha;suborder__nematocera;infraclass endopterygota;subclass neoptera;superclass hexapoda;superkingdom__eukaryota	95.3935	0	837.148	2	5	2	3	2	2	2	2	1	1	170	17	5	131	31	1	1	495	1	105	4	173	0	5	6	4	0	4	1122	1	2	4	2	44	3306	6	4	1	5	4	3	1	48	1	0
Zotu58	culex nigripalpus ;k__metazoa;p__arthropoda;c__insecta;o__diptera;f__culicidae;g__culex;s__culex nigripalpus;subgenus culex;tribe__culicini;subfamily__culicinae;superfamily__culicoidea;infraorder__culicomorpha;suborder__nematocera;infraclass endopterygota;subclass neoptera;superclass hexapoda;superkingdom__eukaryota	95.1923	0	829.934	1	4	4	2	1	2	1	3	2	1	262	293	975	185	27	4	2	25	2	215	2	9	0	3	1	3	1	3	7	1	4	5	6	235	364	203	2299	2	2	2	2	5	172	2	1
Zotu59	ganoderma orbiforme ;k__fungi;p__basidiomycota;c__agaricomycetes;o__polyporales;f__polyporaceae;g__ganoderma;s__ganoderma orbiforme; superkingdom__bacteria;species__candidatus gloeomargarita;superkingdom__bacteria;strain__candidatus gloeomargarita;species__candidatus gloeomargarita;superkingdom__bacteria;species__candidatus gloeomargarita;subfamily__melolonthinae;superfamily__scarabaeoidea;infrao…	95.4545	2.5143e-123	447.62	13	18	0	0	0	0	0	8	3	0	12	55	14	15	19	0	0	0	1	0	1	1	1	14	0	0	0	0	0	1	0	21	5	0	7	0	10	0	2	0	13	2	0	0	0
Zotu60	culex nigripalpus ;k__metazoa;p__arthropoda;c__insecta;o__diptera;f__culicidae;g__culex;s__culex nigripalpus;subgenus culex;tribe__culicini;subfamily__culicinae;superfamily__culicoidea;infraorder__culicomorpha;suborder__nematocera;infraclass endopterygota;subclass neoptera;superclass hexapoda;superkingdom__eukaryota	98.2692	0	893.954	31	19	17	17	19	21	14	16	11	18	520	1507	362	2266	1043	17	18	6708	18	5615	15	384	15	19	16	13	10	19	344	10	18	21	28	496	1418	107	181	24	14	18	15	16	7430	20	7
Zotu61	culex nigripalpus ;k__metazoa;p__arthropoda;c__insecta;o__diptera;f__culicidae;g__culex;s__culex nigripalpus;subgenus culex;tribe__culicini;subfamily__culicinae;superfamily__culicoidea;infraorder__culicomorpha;suborder__nematocera;infraclass endopterygota;subclass neoptera;superclass hexapoda;superkingdom__eukaryota	98.062	0	878.625	6	4	4	3	4	1	5	4	4	2	34	145	317	64	47	6	7	112	6	342	5	6694	7	1	6	5	0	3	519	3	2	7	7	30	18	148	313	5	3	6	6	0	1025	1	1
Zotu63	helonias bullata ;k__viridiplantae;p__streptophyta;c__magnoliopsida;o__liliales;f__melanthiaceae;g__helonias;s__helonias bullata; subclass petrosaviidae;subphylum__streptophytina;superkingdom__eukaryota;	82.5	7.67024	38.2554	0	0	0	0	0	0	0	0	0	0	0	0	0	0	0	0	0	0	0	0	0	0	0	0	0	0	0	0	0	893	1	0	0	0	0	1	0	0	0	0	0	0	0	1	0
Zotu64	culex nigripalpus ;k__metazoa;p__arthropoda;c__insecta;o__diptera;f__culicidae;g__culex;s__culex nigripalpus;subgenus culex;tribe__culicini;subfamily__culicinae;superfamily__culicoidea;infraorder__culicomorpha;suborder__nematocera;infraclass endopterygota;subclass neoptera;superclass hexapoda;superkingdom__eukaryota	95.2015	0	832.639	2	1	1	0	0	0	0	0	1	3	44	8	18	5	2	2	0	4	2	4	0	4	1	2	0	0	0	0	4	0	1	1	1	5	2962	1	3	0	1	1	1	0	3	1	0
Zotu65	culex nigripalpus ;k__metazoa;p__arthropoda;c__insecta;o__diptera;f__culicidae;g__culex;s__culex nigripalpus;subgenus culex;tribe__culicini;subfamily__culicinae;superfamily__culicoidea;infraorder__culicomorpha;suborder__nematocera;infraclass endopterygota;subclass neoptera;superclass hexapoda;superkingdom__eukaryota	98.6434	0	896.659	12	8	9	8	7	4	10	7	5	11	39	9842	72	720	37	11	10	193	14	34	9	21	10	5	7	12	8	7	57	9	5	9	9	39	95	12407	155	6	4	4	5	6	37	7	3
Zotu66	culex nigripalpus ;k__metazoa;p__arthropoda;c__insecta;o__diptera;f__culicidae;g__culex;s__culex nigripalpus;subgenus culex;tribe__culicini;subfamily__culicinae;superfamily__culicoidea;infraorder__culicomorpha;suborder__nematocera;infraclass endopterygota;subclass neoptera;superclass hexapoda;superkingdom__eukaryota	96.8992	0	849.771	1	2	3	0	3	0	4	5	1	1	5	4	5010	5	57	2	2	1	2	4	2	4	1	2	0	2	0	0	3	3	1	1	3	7	5	5	9	0	1	1	2	0	6	0	0
Zotu67	thinophilus nitens ;k__metazoa;p__arthropoda;c__insecta;o__diptera;f__dolichopodidae;g__thinophilus;s__thinophilus nitens;subfamily__hydrophorinae;superfamily__empidoidea;infraorder__muscomorpha;suborder__brachycera;infraclass endopterygota;subclass neoptera;superclass hexapoda;superkingdom__eukaryota	92.8571	1.7474	39.157	0	0	0	0	326	0	0	0	0	0	0	0	0	0	0	0	0	0	0	0	0	0	0	0	0	0	0	0	0	0	3	0	0	0	0	0	0	0	0	0	0	0	0	0	0
Zotu68	___xm_003005510.1__gi:302415448_ ;k__fungi;p__ascomycota;c__sordariomycetes;o__glomerellales;f__plectosphaerellaceae;g__verticillium;s__verticillium alfalfae; subclass hypocreomycetidae;subphylum__pezizomycotina;subkingdom__dikarya;superkingdom__eukaryota;	90	4.58486	38.2554	0	0	1	0	0	0	0	0	0	0	0	0	0	0	0	0	0	0	0	0	0	0	1	0	0	0	0	0	0	0	0	0	0	0	0	0	0	0	0	0	0	0	230	0	0
Zotu69	culex nigripalpus ;k__metazoa;p__arthropoda;c__insecta;o__diptera;f__culicidae;g__culex;s__culex nigripalpus;subgenus culex;tribe__culicini;subfamily__culicinae;superfamily__culicoidea;infraorder__culicomorpha;suborder__nematocera;infraclass endopterygota;subclass neoptera;superclass hexapoda;superkingdom__eukaryota	94.5631	0	805.589	3	3	1	0	5	3	1	2	1	1	755	173	759	102	1866	2	1	53	2	100	3	96	1	3	2	3	1	1	15	0	0	0	1	41	10	12	384	1	1	3	2	3	1008	0	0
Zotu70	culex nigripalpus ;k__metazoa;p__arthropoda;c__insecta;o__diptera;f__culicidae;g__culex;s__culex nigripalpus;subgenus culex;tribe__culicini;subfamily__culicinae;superfamily__culicoidea;infraorder__culicomorpha;suborder__nematocera;infraclass endopterygota;subclass neoptera;superclass hexapoda;superkingdom__eukaryota	97.0646	0	863.297	2	1	6	4	1	3	4	2	3	2	125	12	422	631	1786	4	7	79	3	36	0	131	2	0	2	7	1	5	387	1	1	4	12	205	51	144	104	3	3	2	1	2	375	2	1
Zotu71	culex nigripalpus ;k__metazoa;p__arthropoda;c__insecta;o__diptera;f__culicidae;g__culex;s__culex nigripalpus;subgenus culex;tribe__culicini;subfamily__culicinae;superfamily__culicoidea;infraorder__culicomorpha;suborder__nematocera;infraclass endopterygota;subclass neoptera;superclass hexapoda;superkingdom__eukaryota	95.3488	0	826.328	5	2	2	1	1	0	2	1	1	1	609	2	66	3	290	0	1	2	2	4	1	0	0	1	0	4	0	0	3	0	1	1	0	25	7	62	42	2	0	0	0	0	7	1	0
Zotu72	culex nigripalpus ;k__metazoa;p__arthropoda;c__insecta;o__diptera;f__culicidae;g__culex;s__culex nigripalpus;subgenus culex;tribe__culicini;subfamily__culicinae;superfamily__culicoidea;infraorder__culicomorpha;suborder__nematocera;infraclass endopterygota;subclass neoptera;superclass hexapoda;superkingdom__eukaryota	93.8462	0	793.867	1	0	0	0	2	0	0	3	2	0	61	16	335	1	5	1	2	70	0	1235	0	18	2	2	0	1	0	1	4	2	1	0	2	72	38	6	669	2	0	1	1	1	12	2	0
Zotu73	___jn164922.1__gi:357216417_ ;k__fungi;p__basidiomycota;c__agaricomycetes;o__polyporales;f__polyporaceae;g__trametes;s__trametes cubensis; subphylum__agaricomycotina;subkingdom__dikarya;superkingdom__eukaryota;	100	1.5289e-138	497.213	0	0	0	0	0	0	0	0	0	0	0	0	1	0	0	0	0	0	0	0	0	0	0	0	0	0	0	0	0	0	4	0	12	8	11	8	0	100	6	3	6	23	0	4	0
Zotu74	culex nigripalpus ;k__metazoa;p__arthropoda;c__insecta;o__diptera;f__culicidae;g__culex;s__culex nigripalpus;subgenus culex;tribe__culicini;subfamily__culicinae;superfamily__culicoidea;infraorder__culicomorpha;suborder__nematocera;infraclass endopterygota;subclass neoptera;superclass hexapoda;superkingdom__eukaryota	98.2692	0	893.954	6	1	3	6	1	4	3	1	4	10	57	476	54	7	45	2	5	58	1	168	6	27	3	2	2	5	1	3	11	2	0	2	2	185	286	67	25	5	3	1	5	6	115	2	2
Zotu75	___ab094666.1__gi:37998958_ ;k__fungi;p__ascomycota;c__dothideomycetes;o__pleosporales;f__pleosporaceae;g__alternaria;s__alternaria alternata;suborder__pleosporineae;subclass pleosporomycetidae;subphylum__pezizomycotina;subkingdom__dikarya;superkingdom__eukaryota	100	1.31075e-119	434.095	0	0	5	10	6	1	1	0	0	0	0	0	1	0	0	0	0	0	0	20	3	1	4	0	1	3	0	0	0	0	0	36	0	0	4	0	0	2	1	0	0	30	3	4	0
Zotu76	culex nigripalpus ;k__metazoa;p__arthropoda;c__insecta;o__diptera;f__culicidae;g__culex;s__culex nigripalpus;subgenus culex;tribe__culicini;subfamily__culicinae;superfamily__culicoidea;infraorder__culicomorpha;suborder__nematocera;infraclass endopterygota;subclass neoptera;superclass hexapoda;superkingdom__eukaryota	98.646	0	897.561	1	1	1	5	5	4	2	4	1	3	28	60	293	238	8	1	1	191	1	70	3	122	1	1	2	6	6	2	683	2	3	3	2	485	6647	47	67	1	3	2	5	4	30	4	0
Zotu77	culex pilosus ;k__metazoa;p__arthropoda;c__insecta;o__diptera;f__culicidae;g__culex;s__culex pilosus;subgenus mochlostyrax;tribe__culicini;subfamily__culicinae;superfamily__culicoidea;infraorder__culicomorpha;suborder__nematocera;infraclass endopterygota;subclass neoptera;superclass hexapoda;superkingdom__eukaryota	93.1507	5.48692e-20	104.078	0	0	1	0	123	0	0	0	0	0	0	0	1	0	0	0	0	0	0	0	1	0	0	0	0	1	0	0	0	0	0	1	0	0	0	0	1	0	0	0	0	0	1	1	0
Zotu78	culex nigripalpus ;k__metazoa;p__arthropoda;c__insecta;o__diptera;f__culicidae;g__culex;s__culex nigripalpus;subgenus culex;tribe__culicini;subfamily__culicinae;superfamily__culicoidea;infraorder__culicomorpha;suborder__nematocera;infraclass endopterygota;subclass neoptera;superclass hexapoda;superkingdom__eukaryota	96.325	0	853.378	2	3	4	1	4	0	1	2	2	4	188	178	407	536	287	2	1	285	1	72	1	252	1	2	3	7	1	4	1100	1	5	4	2	119	1490	341	210	2	3	0	5	1	1055	4	0
Zotu79	culex nigripalpus ;k__metazoa;p__arthropoda;c__insecta;o__diptera;f__culicidae;g__culex;s__culex nigripalpus;subgenus culex;tribe__culicini;subfamily__culicinae;superfamily__culicoidea;infraorder__culicomorpha;suborder__nematocera;infraclass endopterygota;subclass neoptera;superclass hexapoda;superkingdom__eukaryota	96.9052	0	852.476	3	2	0	2	6	1	1	1	0	2	35	16	27	4	162	0	1	11	2	60	4	32	1	0	2	0	0	1	32	0	1	1	7	34	18	37	11	1	0	2	2	1	26	1	2
Zotu80	culex nigripalpus ;k__metazoa;p__arthropoda;c__insecta;o__diptera;f__culicidae;g__culex;s__culex nigripalpus;subgenus culex;tribe__culicini;subfamily__culicinae;superfamily__culicoidea;infraorder__culicomorpha;suborder__nematocera;infraclass endopterygota;subclass neoptera;superclass hexapoda;superkingdom__eukaryota	98.6538	0	902.971	11	5	6	11	8	1	1	11	4	3	42	464	822	1816	435	5	8	238	6	32	5	6731	4	5	10	7	5	5	173	3	5	6	13	561	418	2986	76	4	9	6	6	3	3446	3	2
Zotu81	culex nigripalpus ;k__metazoa;p__arthropoda;c__insecta;o__diptera;f__culicidae;g__culex;s__culex nigripalpus;subgenus culex;tribe__culicini;subfamily__culicinae;superfamily__culicoidea;infraorder__culicomorpha;suborder__nematocera;infraclass endopterygota;subclass neoptera;superclass hexapoda;superkingdom__eukaryota	94.971	0	812.802	0	1	2	1	0	1	1	1	1	0	4	0	7	6	1	1	1	2	1	3	0	2	2	1	2	2	0	0	12	0	0	0	0	4	1	1	1	1	0	2	1	2	2	1	0
Zotu82	culex erraticus ;k__metazoa;p__arthropoda;c__insecta;o__diptera;f__culicidae;g__culex;s__culex erraticus;subgenus melanoconion;tribe__culicini;subfamily__culicinae;superfamily__culicoidea;infraorder__culicomorpha;suborder__nematocera;infraclass endopterygota;subclass neoptera;superclass hexapoda;superkingdom__eukaryota	88.2353	4.87926e-21	107.685	39	21	8	19	143	0	0	0	0	0	0	0	0	0	2	7	0	0	0	0	7	0	27	0	0	15	0	0	0	16	13	14	20	1	0	0	0	0	0	0	0	0	0	0	0
Zotu83	ganoderma orbiforme ;k__fungi;p__basidiomycota;c__agaricomycetes;o__polyporales;f__polyporaceae;g__ganoderma;s__ganoderma orbiforme; superkingdom__bacteria;species__candidatus gloeomargarita;superkingdom__bacteria;strain__candidatus gloeomargarita;species__candidatus gloeomargarita;superkingdom__bacteria;species__candidatus gloeomargarita;subfamily__melolonthinae;superfamily__scarabaeoidea;infrao…	95.1049	3.06305e-122	443.112	20	0	0	0	0	0	0	2	4	0	0	19	42	0	0	0	0	0	0	42	0	0	0	0	0	1	0	0	2	0	0	1	8	0	0	0	14	0	0	0	0	1	0	0	0
Zotu84	culex nigripalpus ;k__metazoa;p__arthropoda;c__insecta;o__diptera;f__culicidae;g__culex;s__culex nigripalpus;subgenus culex;tribe__culicini;subfamily__culicinae;superfamily__culicoidea;infraorder__culicomorpha;suborder__nematocera;infraclass endopterygota;subclass neoptera;superclass hexapoda;superkingdom__eukaryota	98.2524	0	883.134	4	4	4	0	1	4	1	3	0	4	554	136	172	31	701	1	4	4456	0	668	3	77	3	5	4	0	0	1	442	3	2	4	1	28	56	20	67	4	4	4	2	2	33	1	2
Zotu85	culex nigripalpus ;k__metazoa;p__arthropoda;c__insecta;o__diptera;f__culicidae;g__culex;s__culex nigripalpus;subgenus culex;tribe__culicini;subfamily__culicinae;superfamily__culicoidea;infraorder__culicomorpha;suborder__nematocera;infraclass endopterygota;subclass neoptera;superclass hexapoda;superkingdom__eukaryota	96.3391	0	851.575	1	1	0	1	0	0	1	0	0	3	31	9	10	2	6	0	0	7	0	2569	1	5	0	0	1	2	0	1	7	0	0	0	2	4	8	5	4	0	2	0	3	2	1	0	1
Zotu86	culex pilosus ;k__metazoa;p__arthropoda;c__insecta;o__diptera;f__culicidae;g__culex;s__culex pilosus;subgenus mochlostyrax;tribe__culicini;subfamily__culicinae;superfamily__culicoidea;infraorder__culicomorpha;suborder__nematocera;infraclass endopterygota;subclass neoptera;superclass hexapoda;superkingdom__eukaryota	93.1507	6.49839e-20	104.078	28	10	97	13	73	1	3	2	1	2	1	1	4	2	0	12	0	1	1	1	2587	1	47	1	2	162	1	0	1	7	234	172	58	1	1	2	1	2	4	4	1	2	3	2	0
Zotu87	culex nigripalpus ;k__metazoa;p__arthropoda;c__insecta;o__diptera;f__culicidae;g__culex;s__culex nigripalpus;subgenus culex;tribe__culicini;subfamily__culicinae;superfamily__culicoidea;infraorder__culicomorpha;suborder__nematocera;infraclass endopterygota;subclass neoptera;superclass hexapoda;superkingdom__eukaryota	93.7864	0	792.064	0	0	0	2	1	1	0	0	0	1	146	55	15	2	2	0	0	1	0	4	0	3	0	0	0	0	0	0	3	0	0	1	0	2	2	1	6	1	0	0	0	0	5	0	0
Zotu88	culex nigripalpus ;k__metazoa;p__arthropoda;c__insecta;o__diptera;f__culicidae;g__culex;s__culex nigripalpus;subgenus culex;tribe__culicini;subfamily__culicinae;superfamily__culicoidea;infraorder__culicomorpha;suborder__nematocera;infraclass endopterygota;subclass neoptera;superclass hexapoda;superkingdom__eukaryota	97.4757	0	865.1	2	1	2	3	2	2	2	1	3	2	903	190	405	39	2918	3	2	53	3	133	1	41	2	2	2	1	1	2	8	2	1	0	6	11	7	8	47	2	1	0	3	0	399	1	0
Zotu89	___af455436.1__gi:21666866_ ;k__fungi;p__ascomycota;c__eurotiomycetes;o__eurotiales;f__aspergillaceae;g__penicillium;s__penicillium commune;subclass eurotiomycetidae;subphylum__pezizomycotina;subkingdom__dikarya;superkingdom__eukaryota	100	1.47315e-125	453.932	0	0	0	1	2	0	0	0	0	0	0	0	0	1	0	106	1	0	0	0	0	2	0	0	0	0	0	0	0	0	0	5	0	1	0	1	0	0	0	0	0	0	0	0	0
Zotu90	___eu030125.1__gi:154431699_ ;k__fungi;p__basidiomycota;c__agaricomycetes;o__polyporales;f__polyporaceae;g__coriolopsis;s__coriolopsis caperata; subphylum__agaricomycotina;subkingdom__dikarya;superkingdom__eukaryota;	100	1.07851e-102	378.19	43	0	0	0	1	0	0	0	0	0	0	46	10	0	8	0	2	6	0	0	0	0	0	0	0	0	0	1	9	0	0	0	0	0	0	0	0	0	0	0	0	0	0	0	1
Zotu91	culex pilosus ;k__metazoa;p__arthropoda;c__insecta;o__diptera;f__culicidae;g__culex;s__culex pilosus;subgenus mochlostyrax;tribe__culicini;subfamily__culicinae;superfamily__culicoidea;infraorder__culicomorpha;suborder__nematocera;infraclass endopterygota;subclass neoptera;superclass hexapoda;superkingdom__eukaryota	91.7808	2.49217e-18	99.5699	0	0	0	1	0	0	0	0	0	0	0	0	0	0	0	0	2	0	0	0	1	0	223	0	0	0	0	0	0	0	0	1	205	0	0	1	0	0	1	0	0	0	0	0	0
Zotu92	___jn182920.1__gi:342674548_ ;k__fungi;p__basidiomycota;c__agaricomycetes;o__polyporales;f__meripilaceae;g__physisporinus;s__physisporinus vitreus; subphylum__agaricomycotina;subkingdom__dikarya;superkingdom__eukaryota;	99.2308	1.33566e-126	457.539	0	0	0	0	18	0	0	0	3	0	0	0	0	13	0	4	0	42	0	0	0	1	1	0	0	0	9	1	27	0	1	0	0	0	0	0	0	0	0	0	0	0	1	0	0
Zotu93	culex nigripalpus ;k__metazoa;p__arthropoda;c__insecta;o__diptera;f__culicidae;g__culex;s__culex nigripalpus;subgenus culex;tribe__culicini;subfamily__culicinae;superfamily__culicoidea;infraorder__culicomorpha;suborder__nematocera;infraclass endopterygota;subclass neoptera;superclass hexapoda;superkingdom__eukaryota	95.7529	0	838.049	1	0	2	0	0	0	1	2	0	0	42	2	30	47	16	1	1	9	0	3	0	17	1	1	1	1	0	0	6	0	0	0	0	12	272	1826	23	1	1	1	0	3	12	2	0
Zotu94	culex nigripalpus ;k__metazoa;p__arthropoda;c__insecta;o__diptera;f__culicidae;g__culex;s__culex nigripalpus;subgenus culex;tribe__culicini;subfamily__culicinae;superfamily__culicoidea;infraorder__culicomorpha;suborder__nematocera;infraclass endopterygota;subclass neoptera;superclass hexapoda;superkingdom__eukaryota	98.2659	0	893.954	7	10	9	12	8	10	12	10	8	7	989	5044	366	146	2069	2	11	1290	10	12711	8	46	10	4	7	9	2	3	82	6	12	7	11	102	669	43	510	8	9	9	6	10	702	7	1
Zotu95	culex nigripalpus ;k__metazoa;p__arthropoda;c__insecta;o__diptera;f__culicidae;g__culex;s__culex nigripalpus;subgenus culex;tribe__culicini;subfamily__culicinae;superfamily__culicoidea;infraorder__culicomorpha;suborder__nematocera;infraclass endopterygota;subclass neoptera;superclass hexapoda;superkingdom__eukaryota	98.0658	0	881.33	3	2	1	2	0	3	1	2	1	2	10	50	11	4	43	1	1	3268	1	13	2	51	3	2	1	0	1	1	47	2	3	1	2	152	100	7	49	1	0	3	2	0	11	0	0
Zotu96	___fj882040.1__gi:269969917_ ;k__fungi;p__basidiomycota;c__agaricomycetes;o__russulales;f__peniophoraceae;g__peniophora;s__peniophora laxitexta;subkingdom__dikarya;superkingdom__eukaryota	98.2063	6.811e-105	385.404	0	0	0	0	0	0	0	0	0	0	0	0	0	0	0	0	0	0	0	0	1	0	0	0	0	1	0	0	0	0	0	0	0	0	0	0	0	0	0	0	0	0	0	0	0
Zotu97	___gq267480.1__gi:254351295_ ;k__fungi;p__basidiomycota;c__agaricomycetes;o__thelephorales;f__thelephoraceae;g__pseudotomentella;s__pseudotomentella tristis;subkingdom__dikarya;superkingdom__eukaryota	96.4912	2.05994e-17	95.0615	0	0	0	1	1	1	0	0	0	0	0	0	0	0	0	0	0	0	0	0	0	0	0	0	0	0	0	0	0	0	0	0	0	0	0	0	0	1	0	0	0	0	0	0	0
Zotu98	culex nigripalpus ;k__metazoa;p__arthropoda;c__insecta;o__diptera;f__culicidae;g__culex;s__culex nigripalpus;subgenus culex;tribe__culicini;subfamily__culicinae;superfamily__culicoidea;infraorder__culicomorpha;suborder__nematocera;infraclass endopterygota;subclass neoptera;superclass hexapoda;superkingdom__eukaryota	96.7054	0	845.263	0	0	1	2	0	1	0	0	0	0	0	1	4	1	1512	0	0	0	1	2	0	2	0	0	0	0	0	1	1	0	1	0	0	0	0	1	2	1	0	0	1	1	1	1	0
Zotu99	___ay124130.1__gi:22530833_ ;k__fungi;p__ascomycota;c__lecanoromycetes;o__peltigerales;f__nephromataceae;g__nephroma;s__nephroma bellum;suborder__peltigerineae;subclass lecanoromycetidae;subphylum__pezizomycotina;subkingdom__dikarya;superkingdom__eukaryota	98.1481	1.01961e-16	94.1598	0	0	0	0	0	1	1	1	0	0	0	0	0	0	0	0	0	0	0	174	0	0	0	0	1	0	0	0	0	0	0	0	0	0	0	0	0	0	1	0	0	0	1	0	0
Zotu100	culex nigripalpus ;k__metazoa;p__arthropoda;c__insecta;o__diptera;f__culicidae;g__culex;s__culex nigripalpus;subgenus culex;tribe__culicini;subfamily__culicinae;superfamily__culicoidea;infraorder__culicomorpha;suborder__nematocera;infraclass endopterygota;subclass neoptera;superclass hexapoda;superkingdom__eukaryota	99.2248	0	910.184	20	9	7	5	2	9	6	2	6	4	39	161	1787	4668	167	4	3	74	4	208	6	945	5	3	5	4	0	1	192	2	8	5	5	77	300	9230	2009	3	4	7	1	4	709	4	3
Zotu101	___fj430590.1__gi:238056460_ ;k__fungi;p__ascomycota;c__sordariomycetes;o__xylariales;f__xylariales;g__diatrypasimilis;s__diatrypasimilis australiensis;superkingdom__eukaryota;subkingdom__dikarya;subphylum__pezizomycotina;subclass xylariomycetidae	79.0441	6.38585e-55	220.396	0	0	0	0	0	0	0	0	0	0	0	0	0	0	0	4	0	0	0	0	0	0	0	0	0	0	0	0	1	0	0	0	0	0	0	0	0	0	0	0	0	0	0	0	0
Zotu102	culex nigripalpus ;k__metazoa;p__arthropoda;c__insecta;o__diptera;f__culicidae;g__culex;s__culex nigripalpus;subgenus culex;tribe__culicini;subfamily__culicinae;superfamily__culicoidea;infraorder__culicomorpha;suborder__nematocera;infraclass endopterygota;subclass neoptera;superclass hexapoda;superkingdom__eukaryota	97.7011	0	881.33	6	5	2	2	4	2	3	3	4	4	499	114	6122	744	871	2	2	97	10	401	3	13	4	2	2	5	2	2	203	1	4	5	4	375	779	72	620	3	4	3	4	4	436	0	3
Zotu103	___dq826737.1__gi:110951114_ ;k__fungi;p__ascomycota;c__eurotiomycetes;o__chaetothyriales;f__herpotrichiellaceae;g__capronia;s__capronia pilosella;subclass chaetothyriomycetidae;subphylum__pezizomycotina;subkingdom__dikarya;superkingdom__eukaryota	76.5957	3.80233e-14	84.2413	0	0	0	0	0	0	0	0	0	0	0	0	0	0	0	0	0	1	0	0	0	0	0	0	0	0	0	0	0	115	0	0	0	0	0	0	0	0	0	0	0	0	0	0	0
Zotu104	culex nigripalpus ;k__metazoa;p__arthropoda;c__insecta;o__diptera;f__culicidae;g__culex;s__culex nigripalpus;subgenus culex;tribe__culicini;subfamily__culicinae;superfamily__culicoidea;infraorder__culicomorpha;suborder__nematocera;infraclass endopterygota;subclass neoptera;superclass hexapoda;superkingdom__eukaryota	93.7984	0	785.752	0	1	0	1	0	0	0	0	0	0	2	20	758	1	6	1	0	3	0	11	0	1	0	0	0	0	0	0	2	0	0	0	0	11	0	2	6	0	0	1	0	1	11	0	0
Zotu105	___ef405864.1__gi:125661831_ ;k__fungi;p__ascomycota;c__dothideomycetes;o__cladosporiales;f__cladosporiaceae;g__cladosporium;s__cladosporium cladosporioides; subclass hypocreomycetidae;subphylum__pezizomycotina;subkingdom__dikarya;superkingdom__eukaryota;species__gondwanamyces;subclass hypocreomycetidae;subphylum__pezizomycotina;subkingdom__dikarya;superkingdom__eukaryota;species__gondwanamyces;s…	99.5652	1.42401e-112	411.553	0	0	0	0	0	0	0	0	0	1	1	0	2	1	0	1	0	0	1	0	0	0	0	0	0	0	0	0	0	0	50	14	17	1	21	2	0	3	0	1	0	0	6	2	1
Zotu106	culex pilosus ;k__metazoa;p__arthropoda;c__insecta;o__diptera;f__culicidae;g__culex;s__culex pilosus;subgenus mochlostyrax;tribe__culicini;subfamily__culicinae;superfamily__culicoidea;infraorder__culicomorpha;suborder__nematocera;infraclass endopterygota;subclass neoptera;superclass hexapoda;superkingdom__eukaryota	93.1507	5.88874e-20	104.078	9	2	2	1	14	0	0	0	0	0	0	0	0	0	1	96	0	0	0	0	108	0	0	0	0	3	0	1	0	0	4	1	4	0	0	0	1	0	0	0	0	0	0	0	0
Zotu107	___ay571045.1__gi:50346942_ ;k__fungi;p__basidiomycota;c__agaricomycetes;o__agaricales;f__schizophyllaceae;g__henningsomyces;s__henningsomyces puber;subclass agaricomycetidae;subkingdom__dikarya;superkingdom__eukaryota	95.5556	2.76057e-117	426.881	0	0	0	0	0	0	0	0	0	0	1	0	0	99	8	0	0	0	0	0	0	1	0	1	0	0	0	0	0	0	0	1	0	0	1	0	0	0	0	0	0	0	0	0	0
Zotu108	helonias bullata ;k__viridiplantae;p__streptophyta;c__magnoliopsida;o__liliales;f__melanthiaceae;g__helonias;s__helonias bullata; subclass petrosaviidae;subphylum__streptophytina;superkingdom__eukaryota;	82.5	7.67024	38.2554	40	1	2	0	0	0	0	0	0	0	0	0	0	0	0	0	0	0	0	0	0	1	0	1	0	0	0	0	0	291	25	0	0	0	0	0	0	0	0	0	0	0	0	0	0
Zotu109	___xm_003005510.1__gi:302415448_ ;k__fungi;p__ascomycota;c__sordariomycetes;o__glomerellales;f__plectosphaerellaceae;g__verticillium;s__verticillium alfalfae; subclass hypocreomycetidae;subphylum__pezizomycotina;subkingdom__dikarya;superkingdom__eukaryota;	90	4.58486	38.2554	0	0	0	0	0	0	0	0	0	0	0	98	0	0	0	0	0	1	0	0	0	0	0	0	0	0	0	0	0	0	0	0	0	0	0	0	0	0	0	0	0	0	0	0	0
Zotu110	___jn164922.1__gi:357216417_ ;k__fungi;p__basidiomycota;c__agaricomycetes;o__polyporales;f__polyporaceae;g__trametes;s__trametes cubensis; subphylum__agaricomycotina;subkingdom__dikarya;superkingdom__eukaryota;	100	2.2505e-136	489.999	0	0	0	0	0	0	0	0	0	0	0	0	0	0	0	0	0	0	0	0	0	0	0	0	0	0	0	0	0	0	0	0	0	0	0	0	0	0	0	0	0	0	0	0	0
Zotu111	culex nigripalpus ;k__metazoa;p__arthropoda;c__insecta;o__diptera;f__culicidae;g__culex;s__culex nigripalpus;subgenus culex;tribe__culicini;subfamily__culicinae;superfamily__culicoidea;infraorder__culicomorpha;suborder__nematocera;infraclass endopterygota;subclass neoptera;superclass hexapoda;superkingdom__eukaryota	99.8058	0	925.513	3	1	0	2	4	0	2	1	2	1	389	59	22	429	109	1	2	326	2	86	0	18	4	2	1	2	1	0	39	0	3	2	0	18	269	155	2893	2	1	1	1	4	10	1	2
Zotu112	culex nigripalpus ;k__metazoa;p__arthropoda;c__insecta;o__diptera;f__culicidae;g__culex;s__culex nigripalpus;subgenus culex;tribe__culicini;subfamily__culicinae;superfamily__culicoidea;infraorder__culicomorpha;suborder__nematocera;infraclass endopterygota;subclass neoptera;superclass hexapoda;superkingdom__eukaryota	97.3333	0	878.625	6	3	2	3	3	2	2	1	3	1	25	44	93	8	1486	4	3	188	2	15	5	8	2	4	3	3	2	2	280	2	2	2	6	39	6690	10	6	4	5	2	4	1	39	3	0
Zotu113	___af210819.1__gi:6563323_ ;k__fungi;p__basidiomycota;c__agaricomycetes;o__russulales;f__peniophoraceae;g__peniophora;s__peniophora aurantiaca;subkingdom__dikarya;superkingdom__eukaryota	91.5751	8.36693e-104	382.699	0	0	0	0	0	0	1	0	0	0	0	0	7	0	40	1	0	0	1	0	0	0	11	0	0	0	0	0	1	0	0	0	0	0	0	0	0	0	0	0	1	0	14	0	0
Zotu114	culex nigripalpus ;k__metazoa;p__arthropoda;c__insecta;o__diptera;f__culicidae;g__culex;s__culex nigripalpus;subgenus culex;tribe__culicini;subfamily__culicinae;superfamily__culicoidea;infraorder__culicomorpha;suborder__nematocera;infraclass endopterygota;subclass neoptera;superclass hexapoda;superkingdom__eukaryota	94.4015	0	802.884	1	1	2	0	3	0	2	2	1	1	10	86	29	20	8	2	0	54	2	4	1	9	0	1	2	2	1	2	57	4	2	3	2	303	116	566	863	4	2	0	3	2	3	0	0
Zotu115	___eu784262.1__gi:209870786_ ;k__fungi;p__basidiomycota;c__agaricomycetes;o__russulales;f__hericiaceae;g__hericium;s__hericium coralloides;subkingdom__dikarya;superkingdom__eukaryota	79.1822	1.29074e-50	205.067	0	0	0	0	0	0	0	0	0	0	0	13	0	0	0	0	0	0	0	0	0	0	0	0	0	46	0	0	7	0	0	0	0	1	8	0	4	0	0	0	0	0	0	0	8
Zotu117	culex nigripalpus ;k__metazoa;p__arthropoda;c__insecta;o__diptera;f__culicidae;g__culex;s__culex nigripalpus;subgenus culex;tribe__culicini;subfamily__culicinae;superfamily__culicoidea;infraorder__culicomorpha;suborder__nematocera;infraclass endopterygota;subclass neoptera;superclass hexapoda;superkingdom__eukaryota	94.4656	0	818.212	2	1	3	1	1	2	1	1	0	2	1618	20	98	135	42	0	0	9	1	146	1	4	1	0	1	0	0	0	6	1	2	1	2	392	373	9	84	2	1	1	1	0	31	0	1
Zotu118	___jf951150.1__gi:338809112_ ;k__fungi;p__ascomycota;c__dothideomycetes;o__capnodiales;f__capnodiaceae;g__leptoxyphium;s__leptoxyphium kurandae;subclass dothideomycetidae;subphylum__pezizomycotina;subkingdom__dikarya;superkingdom__eukaryota	99.5516	8.67036e-109	398.929	0	0	0	0	0	0	0	0	0	0	0	0	0	0	0	0	0	0	0	0	0	0	0	0	0	0	0	0	0	0	0	0	0	0	0	0	0	0	0	0	0	0	0	0	0
Zotu119	___fj537071.1__gi:254681453_ ;k__fungi;p__ascomycota;c__sordariomycetes;o__xylariales;f__diatrypaceae;g__eutypella;s__eutypella vitis;subclass xylariomycetidae;subphylum__pezizomycotina;subkingdom__dikarya;superkingdom__eukaryota	99.1736	5.73346e-118	428.685	0	0	0	0	0	0	0	0	0	0	0	0	0	0	0	0	0	0	0	0	0	0	0	0	0	0	0	0	0	0	0	0	0	82	0	0	0	0	0	0	0	0	0	0	0
Zotu120	___dq647495.1__gi:109644650_ ;k__fungi;p__basidiomycota;c__agaricomycetes;o__corticiales;f__corticiaceae;g__peniophorella;s__hyphoderma rude;subkingdom__dikarya;superkingdom__eukaryota	100	2.89675e-129	466.555	1	0	0	0	0	0	0	0	0	0	0	0	0	0	0	0	0	0	0	0	0	0	0	0	0	0	0	0	0	0	0	0	0	0	0	0	29	0	0	0	0	1	59	0	0
Zotu121	culex nigripalpus ;k__metazoa;p__arthropoda;c__insecta;o__diptera;f__culicidae;g__culex;s__culex nigripalpus;subgenus culex;tribe__culicini;subfamily__culicinae;superfamily__culicoidea;infraorder__culicomorpha;suborder__nematocera;infraclass endopterygota;subclass neoptera;superclass hexapoda;superkingdom__eukaryota	95.7364	0	837.148	1	0	0	0	1	0	0	0	1	0	4	27	8	17	1	0	1	2	1	2	0	2	2	0	0	0	0	0	1	0	1	1	1	2	14	234	137	1	0	1	1	1	1	0	2
Zotu122	___ay124130.1__gi:22530833_ ;k__fungi;p__ascomycota;c__lecanoromycetes;o__peltigerales;f__nephromataceae;g__nephroma;s__nephroma bellum;suborder__peltigerineae;subclass lecanoromycetidae;subphylum__pezizomycotina;subkingdom__dikarya;superkingdom__eukaryota	98.1481	1.01711e-16	94.1598	0	0	0	0	0	0	0	1	0	0	0	0	1	1	0	0	0	0	0	140	0	0	0	0	0	0	0	0	0	0	0	0	0	0	0	0	0	0	0	0	0	0	0	0	0
Zotu123	culex nigripalpus ;k__metazoa;p__arthropoda;c__insecta;o__diptera;f__culicidae;g__culex;s__culex nigripalpus;subgenus culex;tribe__culicini;subfamily__culicinae;superfamily__culicoidea;infraorder__culicomorpha;suborder__nematocera;infraclass endopterygota;subclass neoptera;superclass hexapoda;superkingdom__eukaryota	93.9922	0	790.26	1	0	0	0	1	0	0	0	0	0	101	1	360	6	34	0	0	1	1	8	0	9	0	0	1	1	0	2	0	0	1	1	1	3	1	1	22	1	0	1	0	0	5	0	0
Zotu124	___ay216475.1__gi:29373924_ ;k__fungi;p__basidiomycota;c__agaricomycetes;o__agaricales;f__marasmiaceae;g__marasmius;s__marasmius cladophyllus;subclass agaricomycetidae;subkingdom__dikarya;superkingdom__eukaryota	99.2063	2.71195e-122	443.112	0	0	0	0	6	0	0	0	0	0	0	20	7	1	0	0	1	0	6	0	0	1	16	7	0	0	0	0	5	0	0	0	1	0	0	0	1	1	0	0	2	0	0	0	0
Zotu125	___ay216475.1__gi:29373924_ ;k__fungi;p__basidiomycota;c__agaricomycetes;o__agaricales;f__marasmiaceae;g__marasmius;s__marasmius cladophyllus;subclass agaricomycetidae;subkingdom__dikarya;superkingdom__eukaryota	98.8095	1.15315e-120	438.603	0	0	0	0	40	0	0	0	0	0	0	0	17	0	0	0	0	0	0	1	0	0	0	0	0	0	0	0	2	0	0	17	0	0	0	0	0	0	0	0	0	0	0	0	0
Zotu126	culex nigripalpus ;k__metazoa;p__arthropoda;c__insecta;o__diptera;f__culicidae;g__culex;s__culex nigripalpus;subgenus culex;tribe__culicini;subfamily__culicinae;superfamily__culicoidea;infraorder__culicomorpha;suborder__nematocera;infraclass endopterygota;subclass neoptera;superclass hexapoda;superkingdom__eukaryota	96.8992	0	849.771	0	0	1	1	0	0	0	1	0	0	1	16	1130	275	72	0	1	1	1	1	0	10	0	1	1	2	1	0	3	1	0	0	1	1	1	0	5	0	2	0	0	0	4	0	1
Zotu127	culex pilosus ;k__metazoa;p__arthropoda;c__insecta;o__diptera;f__culicidae;g__culex;s__culex pilosus;subgenus mochlostyrax;tribe__culicini;subfamily__culicinae;superfamily__culicoidea;infraorder__culicomorpha;suborder__nematocera;infraclass endopterygota;subclass neoptera;superclass hexapoda;superkingdom__eukaryota	93.1507	5.91645e-20	104.078	139	0	1	0	1	0	0	0	0	1	0	0	0	1	0	1	0	0	0	1	88	1	1	0	0	0	0	0	0	0	0	1	0	0	1	0	0	0	0	0	0	0	2	0	0
Zotu128	___dq996040.1__gi:116090385_ ;k__fungi;p__ascomycota;c__sordariomycetes;o__diaporthales;f__valsaceae;g__cytospora;s__cytospora rhizophorae;subclass sordariomycetidae;subphylum__pezizomycotina;subkingdom__dikarya;superkingdom__eukaryota	100	3.2601e-115	419.668	0	0	0	0	0	0	0	0	1	0	0	0	0	0	0	0	0	75	0	0	0	0	0	0	0	0	0	0	0	0	3	0	0	0	0	0	0	1	4	0	0	0	0	0	0
Zotu129	___gq409535.1__gi:299483230_ ;k__fungi;p__basidiomycota;c__agaricomycetes;o__polyporales;f__hyphodermataceae;g__hyphoderma;s__hyphoderma puberum; subphylum__agaricomycotina;subkingdom__dikarya;superkingdom__eukaryota;	84.6975	2.94205e-78	297.039	0	0	0	0	0	0	0	0	0	0	0	0	0	0	0	0	0	0	0	0	0	0	0	0	0	0	0	0	0	0	0	0	0	0	0	0	1	0	0	0	0	0	0	0	0
Zotu130	___jn164922.1__gi:357216417_ ;k__fungi;p__basidiomycota;c__agaricomycetes;o__polyporales;f__polyporaceae;g__trametes;s__trametes cubensis; subphylum__agaricomycotina;subkingdom__dikarya;superkingdom__eukaryota;	99.6364	6.50107e-137	492.704	3	0	0	0	0	0	0	0	0	0	0	0	0	0	0	0	0	0	0	0	0	0	0	0	0	0	0	0	0	0	1	11	0	0	2	0	0	15	8	0	0	0	0	0	0
Zotu131	___ab084616.1__gi:27544648_ ;k__fungi;p__basidiomycota;c__agaricomycetes;o__polyporales;f__meruliaceae;g__phlebia;s__phlebia brevispora; subphylum__agaricomycotina;subkingdom__dikarya;superkingdom__eukaryota;	99.6441	3.743e-140	503.525	0	0	0	0	0	0	0	0	0	0	0	0	0	0	0	0	0	0	0	0	0	0	0	0	0	69	0	1	0	0	0	0	0	0	0	0	0	0	0	0	0	0	0	0	0
Zotu132	culex pilosus ;k__metazoa;p__arthropoda;c__insecta;o__diptera;f__culicidae;g__culex;s__culex pilosus;subgenus mochlostyrax;tribe__culicini;subfamily__culicinae;superfamily__culicoidea;infraorder__culicomorpha;suborder__nematocera;infraclass endopterygota;subclass neoptera;superclass hexapoda;superkingdom__eukaryota	93.1507	4.94654e-20	104.078	9	8	9	2	3	0	0	2	1	0	0	1	1	1	1	4	0	1	1	0	5	1	6	0	0	4	1	1	2	4	4	2	4512	0	0	2	2	2	4	2	2	1	1	0	0
Zotu133	___fj810129.1__gi:226346583_ ;k__fungi;p__basidiomycota;c__agaricomycetes;o__russulales;f__stereaceae;g__stereum;s__stereum hirsutum;subkingdom__dikarya;superkingdom__eukaryota	84.7015	7.28499e-73	279.005	0	0	0	0	0	0	0	5	0	0	0	0	0	0	0	0	0	0	0	0	0	0	0	7	0	1	0	0	0	0	0	0	0	0	0	0	0	5	1	0	0	0	0	0	0
Zotu134	culex nigripalpus ;k__metazoa;p__arthropoda;c__insecta;o__diptera;f__culicidae;g__culex;s__culex nigripalpus;subgenus culex;tribe__culicini;subfamily__culicinae;superfamily__culicoidea;infraorder__culicomorpha;suborder__nematocera;infraclass endopterygota;subclass neoptera;superclass hexapoda;superkingdom__eukaryota	97.5191	0	882.232	9	2	3	2	3	1	0	4	2	1	59	70	33	27	109	3	1	42	4	51	4	59	4	1	0	1	1	7	9	2	2	3	5	28	205	32	6	2	3	3	6	2	268	2	2
Zotu135	___eu707868.1__gi:189031672_ ;k__fungi;p__ascomycota;c__dothideomycetes;o__mycosphaerellales;f__teratosphaeriaceae;g__parateratosphaeria;s__teratosphaeria marasasii; subclass dothideomycetidae;subphylum__pezizomycotina;subkingdom__dikarya;superkingdom__eukaryota;	92	8.17008e-84	315.072	0	0	0	0	0	0	0	5	0	0	0	0	0	0	0	4	0	0	0	0	3	0	4	0	0	0	0	0	0	0	8	4	1	7	0	0	0	4	0	0	1	0	4	0	0
Zotu136	___ay341338.1__gi:33356633_ ;k__fungi;p__ascomycota;c__taphrinomycetes;o__taphrinales;f__taphrinaceae;g__taphrina;s__taphrina kruchii;subphylum__taphrinomycotina;subkingdom__dikarya;superkingdom__eukaryota	86.0902	2.18187e-79	300.646	0	0	0	0	0	0	0	0	0	0	0	0	0	0	0	0	0	0	0	0	0	0	0	0	0	0	0	0	0	0	0	0	0	0	0	0	60	0	0	0	0	0	0	0	0
Zotu137	___dq826549.1__gi:112363298_ ;k__fungi;p__basidiomycota;c__agaricomycetes;o__hymenochaetales;f__hymenochaetales;g__resinicium;s__resinicium saccharicola;superkingdom__eukaryota;subkingdom__dikarya	100	6.62742e-117	425.078	8	0	0	0	0	0	0	0	0	0	0	7	0	8	0	3	0	0	0	0	0	0	0	0	0	0	0	0	0	0	0	0	0	1	1	0	0	2	0	0	1	0	4	5	0
Zotu138	___ab210078.1__gi:113208370_ ;k__fungi;p__basidiomycota;c__agaricomycetes;o__polyporales;f__phanerochaetaceae;g__phanerochaete;s__phanerochaete sordida;subkingdom__dikarya;superkingdom__eukaryota	100	5.91415e-131	471.966	0	0	0	0	0	0	0	0	0	0	0	0	1	36	16	0	0	0	0	0	0	0	0	0	0	0	0	0	0	0	0	0	0	0	0	0	0	0	0	0	0	4	0	0	0
Zotu139	___fj810171.1__gi:226346625_ ;k__fungi;p__basidiomycota;c__agaricomycetes;o__hymenochaetales;f__hymenochaetaceae;g__hymenochaete;s__hymenochaete adusta;subkingdom__dikarya;superkingdom__eukaryota	85.0667	7.7088e-106	389.912	0	0	0	0	0	1	0	0	0	0	0	0	2	0	0	0	0	0	0	0	0	0	0	0	0	0	0	0	0	10	0	0	0	0	0	0	0	0	0	0	0	0	6	0	0
Zotu140	___dq647497.1__gi:109644652_ ;k__fungi;p__basidiomycota;c__agaricomycetes;o__corticiales;f__corticiaceae;g__peniophorella;s__hyphoderma rude;subkingdom__dikarya;superkingdom__eukaryota	100	2.87553e-129	466.555	0	0	0	0	0	0	0	0	0	0	0	0	0	0	0	0	0	0	0	0	0	0	0	0	0	1	0	0	0	0	0	0	0	0	0	0	0	0	0	0	0	0	0	0	0
Zotu141	___gu214649.1__gi:284159062_ ;k__fungi;p__ascomycota;c__dothideomycetes;o__capnodiales;f__capnodiaceae;g__polychaeton;s__polychaeton citri;subclass dothideomycetidae;subphylum__pezizomycotina;subkingdom__dikarya;superkingdom__eukaryota	94.7826	1.39662e-93	347.533	0	0	0	0	1	0	0	0	0	0	0	0	0	1	0	0	0	21	0	0	0	0	0	0	0	0	0	0	0	0	0	0	0	0	11	0	0	1	0	0	0	0	0	0	1
Zotu142	___fm876211.1__gi:285307442_ ;k__fungi;p__basidiomycota;c__agaricomycetes;o__hymenochaetales;f__schizoporaceae;g__lagarobasidium;s__lagarobasidium detriticum;subkingdom__dikarya;superkingdom__eukaryota	82.5726	1.69325e-55	222.199	0	0	0	0	0	0	0	0	0	0	0	0	0	0	0	0	0	0	0	0	0	0	0	0	0	0	0	0	0	0	0	0	0	0	0	0	0	0	0	0	0	0	0	0	0
Zotu143	moniliophthora roreri ;k__fungi;p__basidiomycota;c__agaricomycetes;o__agaricales;f__marasmiaceae;g__moniliophthora;s__moniliophthora roreri;subclass agaricomycetidae;subkingdom__dikarya;superkingdom__eukaryota	100	4.348	37.3537	0	0	0	0	0	0	0	0	0	0	0	0	0	0	0	0	0	0	0	0	0	0	0	0	0	0	0	0	0	0	0	0	0	0	0	0	0	0	0	0	0	0	0	0	0
Zotu144	___u66441.1__gi:2289049_ ;k__fungi;p__basidiomycota;c__agaricomycetes;o__hymenochaetales;f__hymenochaetales;g__sphagnomphalia;s__sphagnomphalia brevibasidiata;superkingdom__eukaryota;subkingdom__dikarya	77.5362	1.51626e-18	99.5699	0	0	0	0	0	0	0	0	0	0	0	0	7	11	20	0	2	0	0	0	2	0	0	2	0	0	0	0	4	0	0	0	0	0	0	0	0	2	0	0	1	1	0	0	0
Zotu145	___gq919077.1__gi:260875648_ ;k__fungi;p__ascomycota;c__sordariomycetes;o__xylariales;f__apiosporaceae;g__nigrospora;s__nigrospora sphaerica; subclass xylariomycetidae;subphylum__pezizomycotina;subkingdom__dikarya;superkingdom__eukaryota;	100	3.34895e-114	416.061	0	0	0	1	0	0	0	0	0	0	0	0	0	0	0	0	0	0	0	0	0	0	0	0	0	0	0	0	0	0	0	0	0	0	1	0	0	0	49	0	0	0	0	0	0
Zotu146	___ef175526.1__gi:140260217_ ;k__fungi;p__basidiomycota;c__agaricomycetes;o__agaricales;f__marasmiaceae;g__tetrapyrgos;s__tetrapyrgos subcinerea;subclass agaricomycetidae;subkingdom__dikarya;superkingdom__eukaryota	94.4056	6.72015e-118	428.685	0	0	0	0	0	0	0	0	0	0	0	0	0	55	1	1	0	0	0	0	0	0	0	0	0	1	0	0	0	0	0	0	0	0	0	0	0	0	0	0	0	0	0	0	0
Zotu147	___gq409535.1__gi:299483230_ ;k__fungi;p__basidiomycota;c__agaricomycetes;o__polyporales;f__hyphodermataceae;g__hyphoderma;s__hyphoderma puberum; subphylum__agaricomycotina;subkingdom__dikarya;superkingdom__eukaryota;	85.0534	2.39633e-79	301.547	0	0	0	0	0	0	0	0	0	0	0	0	0	0	0	0	0	0	0	0	0	0	0	0	0	0	0	0	0	0	0	0	0	0	0	0	0	0	0	0	0	0	0	0	0
Zotu148	culex nigripalpus ;k__metazoa;p__arthropoda;c__insecta;o__diptera;f__culicidae;g__culex;s__culex nigripalpus;subgenus culex;tribe__culicini;subfamily__culicinae;superfamily__culicoidea;infraorder__culicomorpha;suborder__nematocera;infraclass endopterygota;subclass neoptera;superclass hexapoda;superkingdom__eukaryota	95.3935	0	837.148	0	1	0	0	0	1	1	0	0	1	465	152	397	144	165	0	1	13	1	88	1	5	0	2	0	0	1	2	12	1	0	1	0	146	173	75	100	0	0	0	1	1	68	0	0
Zotu149	culex nigripalpus ;k__metazoa;p__arthropoda;c__insecta;o__diptera;f__culicidae;g__culex;s__culex nigripalpus;subgenus culex;tribe__culicini;subfamily__culicinae;superfamily__culicoidea;infraorder__culicomorpha;suborder__nematocera;infraclass endopterygota;subclass neoptera;superclass hexapoda;superkingdom__eukaryota	100	0	930.021	7	5	5	2	3	3	2	3	4	2	2272	194	175	535	535	2	2	690	2	462	2	1839	1	4	5	6	1	1	303	1	4	5	1	171	198	74	246	1	3	3	1	6	159	3	0
Zotu150	___ay571044.1__gi:50346941_ ;k__fungi;p__basidiomycota;c__agaricomycetes;o__agaricales;f__schizophyllaceae;g__henningsomyces;s__henningsomyces candidus;subclass agaricomycetidae;subkingdom__dikarya;superkingdom__eukaryota	77.1875	3.64523e-52	211.379	0	0	0	0	0	0	0	0	0	0	0	0	0	58	7	0	0	0	0	1	0	0	0	0	0	0	0	0	0	0	0	1	0	0	0	0	0	0	0	0	0	0	0	0	0
Zotu151	culex nigripalpus ;k__metazoa;p__arthropoda;c__insecta;o__diptera;f__culicidae;g__culex;s__culex nigripalpus;subgenus culex;tribe__culicini;subfamily__culicinae;superfamily__culicoidea;infraorder__culicomorpha;suborder__nematocera;infraclass endopterygota;subclass neoptera;superclass hexapoda;superkingdom__eukaryota	95.1923	0	829.934	1	2	1	0	0	1	1	1	1	0	12	12	556	9	13	2	1	35	1	398	0	4	1	0	1	1	1	0	1	0	2	0	1	818	12	9	16	0	1	0	1	1	22	1	0
Zotu152	lobochlamys culleus ;k__viridiplantae;p__chlorophyta;c__chlorophyceae;o__chlamydomonadales;f__chlamydomonadaceae;g__lobochlamys;s__lobochlamys culleus;superkingdom__eukaryota	76.6667	0.19628	43.6655	1	0	0	0	0	0	0	0	0	0	0	0	0	0	0	0	0	0	0	0	0	0	0	0	0	0	0	0	0	0	0	0	0	0	0	0	0	0	0	0	0	0	0	0	0
Zotu153	___ay341338.1__gi:33356633_ ;k__fungi;p__ascomycota;c__taphrinomycetes;o__taphrinales;f__taphrinaceae;g__taphrina;s__taphrina kruchii;subphylum__taphrinomycotina;subkingdom__dikarya;superkingdom__eukaryota	85.8779	3.21051e-77	293.432	0	0	0	0	0	0	0	0	0	0	0	0	0	0	0	0	0	0	0	0	0	0	0	0	0	0	0	0	0	0	0	0	0	0	0	0	0	0	0	0	0	0	0	0	0
Zotu154	culex nigripalpus ;k__metazoa;p__arthropoda;c__insecta;o__diptera;f__culicidae;g__culex;s__culex nigripalpus;subgenus culex;tribe__culicini;subfamily__culicinae;superfamily__culicoidea;infraorder__culicomorpha;suborder__nematocera;infraclass endopterygota;subclass neoptera;superclass hexapoda;superkingdom__eukaryota	95.7364	0	837.148	0	0	1	0	0	0	0	0	0	0	0	68	63	11	2	0	0	2	0	198	0	0	0	4	0	0	0	1	3	0	0	0	0	20	8	108	26	1	1	0	0	0	3	2	0
Zotu155	___ay509555.1__gi:40846333_ ;k__fungi;p__basidiomycota;c__agaricomycetes;o__auriculariales;f__exidiaceae;g__exidia;s__exidia glandulosa;subkingdom__dikarya;superkingdom__eukaryota	87.2951	5.12919e-74	283.514	7	0	0	0	0	0	0	7	0	0	1	0	18	11	0	1	0	0	0	0	0	0	0	0	0	0	0	0	0	0	0	0	1	0	0	0	0	0	0	0	0	0	16	0	0
Zotu156	___fj903297.1__gi:237641516_ ;k__fungi;p__basidiomycota;c__agaricomycetes;o__corticiales;f__corticiaceae;g__sistotrema;s__sistotrema brinkmannii;subkingdom__dikarya;superkingdom__eukaryota	76.7528	1.47903e-43	182.525	0	0	0	0	0	0	0	0	0	0	0	42	0	0	0	0	0	0	0	0	0	0	0	0	0	0	0	0	0	0	0	0	0	0	0	0	3	0	0	0	0	0	0	0	0
Zotu157	culex pilosus ;k__metazoa;p__arthropoda;c__insecta;o__diptera;f__culicidae;g__culex;s__culex pilosus;subgenus mochlostyrax;tribe__culicini;subfamily__culicinae;superfamily__culicoidea;infraorder__culicomorpha;suborder__nematocera;infraclass endopterygota;subclass neoptera;superclass hexapoda;superkingdom__eukaryota	93.1507	6.04115e-20	104.078	1	419	8	4	7	1	0	0	1	4	1	0	2	4	2	2	1	1	1	0	2916	0	0	1	1	3	2	0	1	0	5	6	3	3	2	2	1	2	1	1	1	1	3	0	1
Zotu158	___eu935573.1__gi:219562430_ ;k__fungi;p__basidiomycota;c__agaricomycetes;o__agaricales;f__marasmiaceae;g__marasmius;s__marasmius nigrobrunneus;forma__marasmius nigrobrunneus nw_2008a;subclass agaricomycetidae;subkingdom__dikarya;superkingdom__eukaryota	99.2982	8.90666e-142	508.033	0	0	0	0	0	0	0	0	0	0	0	0	1	37	0	0	0	0	0	0	0	0	0	0	0	0	0	0	0	0	0	0	0	17	0	0	0	0	0	0	0	0	0	0	0
Zotu159	___dq361059.1__gi:86517166_ ;k__fungi;p__ascomycota;c__saccharomycetes;o__saccharomycetales;f__saccharomycopsidaceae;g__arthroascus;s__arthroascus fermentans;subphylum__saccharomycotina;subkingdom__dikarya;superkingdom__eukaryota	98.9583	3.57551e-141	507.131	0	0	0	0	0	0	0	0	0	0	0	0	0	0	0	0	0	0	0	0	0	0	0	0	0	0	0	0	0	0	0	0	0	0	0	0	0	0	0	0	0	0	49	0	0
Zotu160	___ef175514.1__gi:140260205_ ;k__fungi;p__basidiomycota;c__agaricomycetes;o__agaricales;f__omphalotaceae;g__marasmiellus;s__marasmiellus candidus; subclass agaricomycetidae;subphylum__agaricomycotina;subkingdom__dikarya;superkingdom__eukaryota;	92.9825	1.47434e-113	414.258	0	0	0	0	0	0	0	1	0	0	0	0	0	0	0	0	0	0	0	0	0	0	0	0	0	0	0	0	0	0	0	0	0	0	0	0	0	0	0	0	0	0	25	0	13
Zotu161	___gq303287.1__gi:258578862_ ;k__fungi;p__ascomycota;c__sordariomycetes;o__xylariales;f__xylariales;g__polyscytalum;s__polyscytalum algarvense; subclass xylariomycetidae;subphylum__pezizomycotina;subkingdom__dikarya;superkingdom__eukaryota;	80.083	5.829e-48	196.952	0	0	0	0	0	0	0	0	0	0	0	0	0	0	0	0	1	37	0	0	0	0	0	0	0	0	0	0	0	0	0	0	0	1	0	0	0	0	0	0	0	0	0	0	0
Zotu162	___eu552138.1__gi:189909466_ ;k__fungi;p__ascomycota;c__dothideomycetes;o__pleosporales;f__lophiostomataceae;g__lophiostoma;s__lophiostoma cynaroidis;subclass pleosporomycetidae;subphylum__pezizomycotina;subkingdom__dikarya;superkingdom__eukaryota	82.5503	1.90093e-29	135.637	0	0	0	0	0	1	0	0	0	0	0	0	0	0	0	0	0	0	0	0	0	0	0	0	0	0	0	0	0	0	0	0	0	0	0	0	0	0	0	0	0	0	0	0	0
Zotu163	___eu118629.1__gi:157057281_ ;k__fungi;p__basidiomycota;c__agaricomycetes;o__corticiales;f__corticiaceae;g__haplotrichum;s__haplotrichum curtisii;subkingdom__dikarya;superkingdom__eukaryota	75.9124	1.42868e-43	181.623	0	0	0	0	0	0	0	0	0	0	0	0	0	0	0	0	0	0	0	0	0	0	0	0	0	0	0	0	0	0	0	0	0	0	0	1	0	0	0	0	0	0	3	0	0
Zotu164	___ef175514.1__gi:140260205_ ;k__fungi;p__basidiomycota;c__agaricomycetes;o__agaricales;f__omphalotaceae;g__marasmiellus;s__marasmiellus candidus; subclass agaricomycetidae;subphylum__agaricomycotina;subkingdom__dikarya;superkingdom__eukaryota;	92.6316	6.26904e-112	409.749	0	0	0	0	0	0	0	0	0	0	0	0	0	0	0	0	0	0	0	0	0	0	0	0	0	0	0	0	0	0	0	0	0	0	0	0	0	0	0	0	0	0	0	0	0
Zotu165	___dq534563.1__gi:108744853_ ;k__fungi;p__basidiomycota;c__agaricomycetes;o__boletales;f__boletaceae;g__tylopilus;s__porphyrellus porphyrosporus;subfamily__boletoideae;suborder__boletineae;subclass agaricomycetidae;subkingdom__dikarya;superkingdom__eukaryota	80.5085	1.91479e-18	98.6682	0	0	0	1	0	1	0	0	0	0	0	0	0	20	0	0	0	0	0	13	0	0	0	0	0	0	0	0	0	0	0	0	0	0	0	0	0	0	0	0	0	0	0	0	0
Zotu166	culex nigripalpus ;k__metazoa;p__arthropoda;c__insecta;o__diptera;f__culicidae;g__culex;s__culex nigripalpus;subgenus culex;tribe__culicini;subfamily__culicinae;superfamily__culicoidea;infraorder__culicomorpha;suborder__nematocera;infraclass endopterygota;subclass neoptera;superclass hexapoda;superkingdom__eukaryota	99.0329	0	906.577	1	0	0	0	1	0	0	0	0	0	10	5	27	9	174	0	0	57	1	239	1	6	0	0	1	1	1	1	8	0	0	0	1	12	12	9	1349	0	0	0	0	0	3	0	0
Zotu167	cryptococcus albidus ;k__fungi;p__basidiomycota;c__tremellomycetes;o__tremellales;f__cryptococcaceae;g__cryptococcus;s__cryptococcus albidus; subphylum__agaricomycotina;subkingdom__dikarya;superkingdom__eukaryota;	100	3.34895e-114	416.061	0	0	0	0	0	0	0	0	0	0	0	0	0	0	30	0	0	0	0	0	1	0	0	0	0	0	0	0	0	0	0	0	0	0	0	0	0	0	0	0	4	0	0	0	0
Zotu168	___gu258309.1__gi:294938564_ ;k__fungi;p__basidiomycota;c__agaricomycetes;o__russulales;f__russulaceae;g__lactarius;s__lactarius wirrabara;subkingdom__dikarya;superkingdom__eukaryota	100	2.92924e-16	91.4547	0	0	0	0	0	0	0	0	1	0	0	0	4	0	0	0	0	0	0	0	1	0	0	0	0	0	0	0	0	0	0	0	0	0	0	0	0	1	0	0	0	0	9	0	0
Zotu169	culex pilosus ;k__metazoa;p__arthropoda;c__insecta;o__diptera;f__culicidae;g__culex;s__culex pilosus;subgenus mochlostyrax;tribe__culicini;subfamily__culicinae;superfamily__culicoidea;infraorder__culicomorpha;suborder__nematocera;infraclass endopterygota;subclass neoptera;superclass hexapoda;superkingdom__eukaryota	93.1507	6.38755e-20	104.078	0	0	0	0	0	0	0	0	0	0	0	0	1	0	0	0	0	0	0	0	1	0	273	0	0	0	0	0	0	0	1	1	0	0	0	0	0	0	0	0	0	0	0	0	0
Zotu170	___jf440592.1__gi:328942620_ ;k__fungi;p__ascomycota;c__sordariomycetes;o__sordariales;f__lasiosphaeriaceae;g__fimetariella;s__fimetariella rabenhorstii;subclass sordariomycetidae;subphylum__pezizomycotina;subkingdom__dikarya;superkingdom__eukaryota	93.3884	3.46981e-95	352.943	0	0	0	0	0	0	0	0	0	0	0	0	0	0	0	0	0	0	0	0	3	0	0	0	0	0	0	0	0	0	0	0	0	29	0	0	0	0	0	0	0	0	0	0	0
Zotu171	___ab512315.1__gi:254553112_ ;k__fungi;p__basidiomycota;c__agaricomycetes;o__agaricales;f__omphalotaceae;g__marasmiellus;s__marasmiellus candidus; subclass agaricomycetidae;subphylum__agaricomycotina;subkingdom__dikarya;superkingdom__eukaryota;	97.2441	2.32695e-117	427.783	0	0	0	0	0	0	0	0	0	0	0	0	0	0	0	0	0	0	0	0	0	0	0	0	0	0	0	0	0	0	0	0	0	0	0	0	0	0	0	0	1	0	16	0	0
Zotu172	___ay509555.1__gi:40846333_ ;k__fungi;p__basidiomycota;c__agaricomycetes;o__auriculariales;f__exidiaceae;g__exidia;s__exidia glandulosa;subkingdom__dikarya;superkingdom__eukaryota	87.0833	7.53812e-72	276.3	0	0	0	0	0	0	0	0	0	0	0	0	0	0	0	0	0	0	0	0	0	0	0	0	0	0	0	0	0	0	0	0	0	0	0	0	0	0	0	0	0	0	0	0	0
Zotu173	culex nigripalpus ;k__metazoa;p__arthropoda;c__insecta;o__diptera;f__culicidae;g__culex;s__culex nigripalpus;subgenus culex;tribe__culicini;subfamily__culicinae;superfamily__culicoidea;infraorder__culicomorpha;suborder__nematocera;infraclass endopterygota;subclass neoptera;superclass hexapoda;superkingdom__eukaryota	93.9922	0	790.26	1	0	0	0	1	1	0	0	0	0	1	1	526	1	1	0	1	1	0	1	0	3	0	0	0	0	0	0	2	1	0	1	0	0	4	1	13	0	0	1	0	0	2	0	0
Zotu174	___hq607954.1__gi:312434432_ ;k__fungi;p__basidiomycota;c__agaricomycetes;o__polyporales;f__meruliaceae;g__phlebia;s__phlebia subserialis; subphylum__agaricomycotina;subkingdom__dikarya;superkingdom__eukaryota;	86.2191	8.75655e-85	319.581	0	0	0	0	0	0	0	0	0	0	0	0	0	0	0	0	0	0	0	0	0	0	0	0	0	0	0	0	0	0	0	0	0	13	0	0	0	1	0	0	0	4	0	0	0
Zotu175	hyphoderma obtusiforme ;k__fungi;p__basidiomycota;c__agaricomycetes;o__polyporales;f__hyphodermataceae;g__hyphoderma;s__hyphoderma obtusiforme; subphylum__agaricomycotina;subkingdom__dikarya;superkingdom__eukaryota;	81.0526	1.87684e-61	241.134	0	0	0	0	0	0	0	2	0	0	0	0	0	15	0	0	0	0	0	0	0	0	0	0	0	0	0	0	0	0	0	1	0	0	0	0	0	0	0	0	0	0	17	0	0
Zotu176	pteris vittata ;k__viridiplantae;p__streptophyta;c__polypodiopsida;o__polypodiales;f__pteridaceae;g__pteris;s__pteris vittata; subfamily__pteridoideae;suborder__pteridineae;subclass polypodiidae;subphylum__streptophytina;superkingdom__eukaryota;	82.7434	3.08786e-57	226.707	0	0	0	0	0	0	0	0	0	0	0	0	0	6	0	0	2	0	0	0	0	0	7	11	0	0	0	0	0	0	0	0	0	0	3	0	0	0	0	0	0	0	0	0	0
Zotu177	culex nigripalpus ;k__metazoa;p__arthropoda;c__insecta;o__diptera;f__culicidae;g__culex;s__culex nigripalpus;subgenus culex;tribe__culicini;subfamily__culicinae;superfamily__culicoidea;infraorder__culicomorpha;suborder__nematocera;infraclass endopterygota;subclass neoptera;superclass hexapoda;superkingdom__eukaryota	95.5426	0	829.934	0	0	0	1	1	0	1	1	0	0	0	15	26	22	11	1	1	336	1	36	0	11	0	0	0	0	0	2	12	0	1	2	1	22	31	256	40	0	0	0	0	0	26	1	0
Zotu178	anthoceros angustus ;k__viridiplantae;p__streptophyta;c__anthocerotopsida;o__anthocerotales;f__anthocerotaceae;g__anthoceros;s__anthoceros angustus;subclass anthocerotidae;superkingdom__eukaryota	78.7234	2.4024	38.2554	0	0	0	0	0	0	0	0	0	0	0	0	0	0	0	0	0	0	0	0	0	0	0	0	0	0	0	43	0	0	0	0	0	0	0	0	0	0	0	0	0	0	0	0	0
Zotu179	amaranthus tricolor ;k__viridiplantae;p__streptophyta;c__magnoliopsida;o__caryophyllales;f__amaranthaceae;g__amaranthus;s__amaranthus tricolor; subphylum__streptophytina;superkingdom__eukaryota;	92	3.45133	37.3537	0	0	0	0	9	0	0	0	0	0	0	0	0	0	0	0	0	0	0	0	0	0	0	0	0	0	0	0	0	0	0	0	0	0	0	0	0	0	0	0	0	0	0	0	0
Zotu180	___eu030147.1__gi:154431721_ ;k__fungi;p__basidiomycota;c__agaricomycetes;o__polyporales;f__polyporaceae;g__coriolopsis;s__coriolopsis caperata; subphylum__agaricomycotina;subkingdom__dikarya;superkingdom__eukaryota;	99.5169	5.58684e-100	370.075	0	0	0	0	0	0	0	0	0	0	0	0	0	0	0	0	0	0	0	0	0	0	0	0	0	0	0	0	1	34	0	0	0	0	0	0	0	0	0	0	0	0	0	0	0
Zotu181	___ab015696.1__gi:4630822_ ;k__fungi;p__basidiomycota;c__agaricomycetes;o__agaricales;f__amanitaceae;g__amanita;s__amanita flavipes;subclass agaricomycetidae;subkingdom__dikarya;superkingdom__eukaryota	93.5385	3.98318e-134	483.687	0	0	0	0	0	0	0	0	0	0	0	51	0	0	0	0	0	0	0	0	0	0	0	0	0	0	0	0	0	0	0	0	0	0	0	0	0	0	0	0	0	0	0	0	0
Zotu182	___hq533018.1__gi:314913962_ ;k__fungi;p__basidiomycota;c__agaricomycetes;o__hymenochaetales;f__hymenochaetaceae;g__hymenochaete;s__hymenochaete cinnamomea;subkingdom__dikarya;superkingdom__eukaryota	85.5191	4.26362e-109	399.831	0	0	0	0	0	0	0	0	0	0	9	0	3	8	0	0	0	0	0	0	0	0	0	0	0	0	0	0	0	0	0	0	0	0	9	0	0	1	0	2	0	3	8	0	0
Zotu183	___dq659348.1__gi:110520348_ ;k__fungi;p__ascomycota;c__saccharomycetes;o__saccharomycetales;f__pichiaceae;g__pichia;s__pichia fermentans;subphylum__saccharomycotina;subkingdom__dikarya;superkingdom__eukaryota	84.375	6.00822e-39	166.295	0	0	0	0	0	0	0	0	0	0	0	0	0	0	0	0	0	0	0	0	0	0	0	0	1	0	1	0	0	0	0	0	0	0	0	0	0	2	0	0	0	0	15	7	0
Zotu185	xylaria longipes ;k__fungi;p__ascomycota;c__sordariomycetes;o__xylariales;f__xylariaceae;g__xylaria;s__xylaria longipes;subclass xylariomycetidae;subphylum__pezizomycotina;subkingdom__dikarya;superkingdom__eukaryota	80.5668	1.68641e-48	198.755	0	0	0	0	0	0	0	0	0	0	0	0	0	2	0	0	0	9	0	0	0	0	0	0	0	0	0	0	0	0	0	10	0	0	0	0	0	0	0	0	0	0	42	0	0
Zotu186	talaromyces radicus ;k__fungi;p__ascomycota;c__eurotiomycetes;o__eurotiales;f__trichocomaceae;g__talaromyces;s__talaromyces radicus;subclass eurotiomycetidae;subphylum__pezizomycotina;subkingdom__dikarya;superkingdom__eukaryota	99.6109	3.55901e-127	460.244	0	0	0	0	0	0	0	0	0	0	0	0	0	0	0	0	0	0	0	0	0	0	0	0	0	0	0	0	0	0	0	0	0	0	0	0	0	0	0	0	0	0	0	0	0
Zotu187	mythimna separata ;k__metazoa;p__arthropoda;c__insecta;o__lepidoptera;f__noctuidae;g__mythimna;s__mythimna separata;subfamily__hadeninae;superfamily__noctuoidea;parvorder__heteroneura;infraorder__neolepidoptera;suborder__glossata;superorder__amphiesmenoptera;infraclass endopterygota;subclass neoptera;superclass hexapoda;superkingdom__eukaryota	96.1538	0.10703	43.6655	0	0	0	8	0	0	0	0	0	0	0	0	0	0	0	1	0	0	0	0	9	0	0	0	0	34	0	0	0	2	2	0	0	0	0	0	0	0	0	0	0	0	0	0	0
Zotu188	___ab360356.1__gi:189332652_ ;k__fungi;p__ascomycota;c__sordariomycetes;o__hypocreales;f__cordycipitaceae;g__lecanicillium;s__lecanicillium kalimantanense;subclass hypocreomycetidae;subphylum__pezizomycotina;subkingdom__dikarya;superkingdom__eukaryota	100	1.39855e-119	434.095	0	0	0	0	0	0	0	0	0	0	0	24	0	0	0	0	0	0	0	0	0	0	0	0	0	0	0	0	0	0	0	0	1	0	0	0	0	0	0	0	0	0	0	0	0
Zotu189	culex nigripalpus ;k__metazoa;p__arthropoda;c__insecta;o__diptera;f__culicidae;g__culex;s__culex nigripalpus;subgenus culex;tribe__culicini;subfamily__culicinae;superfamily__culicoidea;infraorder__culicomorpha;suborder__nematocera;infraclass endopterygota;subclass neoptera;superclass hexapoda;superkingdom__eukaryota	97.7011	0	881.33	0	0	1	1	1	0	3	0	0	2	45	12	4	77	34	1	1	353	2	30	2	72	2	2	2	2	2	0	311	1	1	5	1	6	2690	10	5	0	4	1	0	0	426	2	0
Zotu190	___dq411529.1__gi:89887360_ ;k__fungi;p__basidiomycota;c__agaricomycetes;o__trechisporales;f__hydnodontaceae;g__trechispora;s__trechispora alnicola; subphylum__agaricomycotina;subkingdom__dikarya;superkingdom__eukaryota;	85.4545	3.26586e-77	293.432	0	0	0	0	11	0	0	0	0	0	0	0	3	13	0	0	0	0	0	0	0	1	0	0	21	1	0	0	0	0	0	0	4	0	0	0	0	0	0	0	0	0	0	0	0
Zotu191	hypoxylon fendleri ;k__fungi;p__ascomycota;c__sordariomycetes;o__xylariales;f__hypoxylaceae;g__hypoxylon;s__hypoxylon fendleri; subclass xylariomycetidae;subphylum__pezizomycotina;subkingdom__dikarya;superkingdom__eukaryota;	95.5102	5.35688e-106	389.912	0	0	0	0	1	0	0	0	4	0	0	0	0	42	0	0	0	0	0	0	0	3	0	0	0	0	0	0	0	0	0	0	1	0	0	0	0	0	0	0	0	0	0	0	0
Zotu192	culex nigripalpus ;k__metazoa;p__arthropoda;c__insecta;o__diptera;f__culicidae;g__culex;s__culex nigripalpus;subgenus culex;tribe__culicini;subfamily__culicinae;superfamily__culicoidea;infraorder__culicomorpha;suborder__nematocera;infraclass endopterygota;subclass neoptera;superclass hexapoda;superkingdom__eukaryota	95.1923	0	829.934	0	1	1	0	0	0	0	0	0	0	11	30	14	61	4	0	0	9	0	5	0	6	0	0	1	1	0	0	7	1	0	0	0	31	53	1221	22	0	0	1	1	0	4	0	1
Zotu193	culex pilosus ;k__metazoa;p__arthropoda;c__insecta;o__diptera;f__culicidae;g__culex;s__culex pilosus;subgenus mochlostyrax;tribe__culicini;subfamily__culicinae;superfamily__culicoidea;infraorder__culicomorpha;suborder__nematocera;infraclass endopterygota;subclass neoptera;superclass hexapoda;superkingdom__eukaryota	93.1507	6.42911e-20	104.078	1	0	0	1	0	0	0	0	0	0	1	0	0	0	0	272	0	0	1	0	1	0	0	0	0	0	0	0	0	0	0	1	0	0	0	0	0	0	0	0	1	0	0	0	0
Zotu195	___eu232219.1__gi:166361546_ ;k__fungi;p__basidiomycota;c__agaricomycetes;o__polyporales;f__polyporaceae;g__ganoderma;s__ganoderma applanatum; superkingdom__bacteria;species__candidatus gloeomargarita;superkingdom__bacteria;strain__candidatus gloeomargarita;species__candidatus gloeomargarita;superkingdom__bacteria;species__candidatus gloeomargarita;subfamily__melolonthinae;superfamily__scarabaeoi…	92.4528	9.07932e-78	296.137	0	0	0	0	0	0	0	0	0	0	0	0	0	0	0	0	0	0	0	0	0	0	30	1	0	10	0	0	0	0	0	0	0	0	0	0	0	0	0	0	0	0	2	0	0
Zotu196	___aj301908.1__gi:17426612_ ;k__fungi;p__ascomycota;c__sordariomycetes;o__glomerellales;f__glomerellaceae;g__colletotrichum;s__glomerella cingulata;subclass hypocreomycetidae;subphylum__pezizomycotina;subkingdom__dikarya;superkingdom__eukaryota	99.1903	1.11197e-120	437.702	35	0	0	0	0	0	0	0	0	0	0	0	0	0	0	0	0	0	0	0	0	0	0	0	0	0	0	0	0	0	0	0	0	0	0	0	0	0	0	0	0	0	0	0	0
Zotu197	thorea hispida ;k__eukaryota;p__rhodophyta;c__florideophyceae;o__thoreales;f__thoreaceae;g__thorea;s__thorea hispida;superkingdom__eukaryota;subclass nemaliophycidae;	89.2857	3.45133	38.2554	1	0	0	0	0	0	0	0	0	0	0	0	0	0	0	0	0	0	0	0	0	0	1	0	0	0	0	0	0	0	0	0	1	0	0	0	0	0	0	0	0	0	0	0	0
Zotu198	culex nigripalpus ;k__metazoa;p__arthropoda;c__insecta;o__diptera;f__culicidae;g__culex;s__culex nigripalpus;subgenus culex;tribe__culicini;subfamily__culicinae;superfamily__culicoidea;infraorder__culicomorpha;suborder__nematocera;infraclass endopterygota;subclass neoptera;superclass hexapoda;superkingdom__eukaryota	95.3578	0	829.033	7	1	1	1	1	0	1	0	0	1	89	28	1531	457	12	1	1	10	1	150	3	100	2	1	3	0	1	3	99	0	2	2	1	789	884	10	82	0	0	2	1	1	27	2	0
Zotu200	___fj481022.1__gi:218664615_ ;k__fungi;p__basidiomycota;c__agaricomycetes;o__hymenochaetales;f__hymenochaetaceae;g__pseudochaete;s__pseudochaete tabacina;subkingdom__dikarya;superkingdom__eukaryota	84.0731	2.81294e-105	387.207	0	0	0	0	0	0	0	0	0	0	0	0	0	0	0	0	0	0	0	0	0	0	0	0	0	0	0	0	0	0	0	0	0	0	0	0	33	0	0	0	0	0	0	0	0
Zotu201	fuscoporia ferruginosa ;k__fungi;p__basidiomycota;c__agaricomycetes;o__hymenochaetales;f__hymenochaetaceae;g__fuscoporia;s__fuscoporia ferruginosa;subkingdom__dikarya;superkingdom__eukaryota	100	5.31923e-119	432.291	0	0	0	0	0	0	0	0	0	0	29	3	0	13	0	1	0	0	0	0	0	0	0	0	0	0	0	0	0	0	0	0	0	0	5	0	0	0	1	0	0	1	0	1	0
Zotu202	___gq409535.1__gi:299483230_ ;k__fungi;p__basidiomycota;c__agaricomycetes;o__polyporales;f__hyphodermataceae;g__hyphoderma;s__hyphoderma puberum; subphylum__agaricomycotina;subkingdom__dikarya;superkingdom__eukaryota;	85.0534	2.41498e-79	301.547	0	0	0	0	0	0	0	0	0	0	0	0	0	0	0	0	0	0	0	0	0	0	0	0	0	0	0	0	0	0	0	0	0	0	0	0	0	0	0	0	0	0	14	0	0
Zotu203	culex pilosus ;k__metazoa;p__arthropoda;c__insecta;o__diptera;f__culicidae;g__culex;s__culex pilosus;subgenus mochlostyrax;tribe__culicini;subfamily__culicinae;superfamily__culicoidea;infraorder__culicomorpha;suborder__nematocera;infraclass endopterygota;subclass neoptera;superclass hexapoda;superkingdom__eukaryota	93.1507	5.88874e-20	104.078	0	1	89	0	0	0	0	0	0	0	0	0	0	0	0	0	0	0	0	0	0	0	0	0	0	0	0	0	0	0	0	0	0	0	0	0	0	0	0	0	0	0	0	0	0
Zotu204	culex nigripalpus ;k__metazoa;p__arthropoda;c__insecta;o__diptera;f__culicidae;g__culex;s__culex nigripalpus;subgenus culex;tribe__culicini;subfamily__culicinae;superfamily__culicoidea;infraorder__culicomorpha;suborder__nematocera;infraclass endopterygota;subclass neoptera;superclass hexapoda;superkingdom__eukaryota	96.7308	0	860.592	2	3	1	1	0	0	0	2	0	1	410	118	477	39	3	1	0	4	0	256	2	0	0	0	1	1	0	1	4	1	0	0	2	4	53	3	5	0	0	1	0	0	8	1	1
Zotu205	___jf908384.1__gi:344333341_ ;k__fungi;p__basidiomycota;c__agaricomycetes;o__agaricales;f__mycenaceae;g__mycena;s__mycena acicula; subclass agaricomycetidae;subphylum__agaricomycotina;subkingdom__dikarya;superkingdom__eukaryota;	88.4106	3.94153e-102	376.387	0	0	0	0	0	0	0	0	0	0	0	0	0	0	0	0	0	0	0	0	0	0	0	0	0	0	0	0	29	0	0	0	0	0	0	0	0	0	0	0	0	0	0	0	0
Zotu206	___gu207282.1__gi:288887199_ ;k__fungi;p__basidiomycota;c__agaricomycetes;o__polyporales;f__polyporaceae;g__lentinus;s__lentinus crinitus; subphylum__agaricomycotina;subkingdom__dikarya;superkingdom__eukaryota;	100	8.76385e-136	488.196	0	0	0	0	1	0	0	0	0	0	0	7	0	0	0	0	0	0	0	0	0	1	0	0	0	0	0	0	0	0	0	0	0	0	0	0	19	2	0	0	0	0	0	0	0
Zotu207	___ay216474.1__gi:29373923_ ;k__fungi;p__basidiomycota;c__agaricomycetes;o__agaricales;f__physalacriaceae;g__oudemansiella;s__oudemansiella canarii;subclass agaricomycetidae;subkingdom__dikarya;superkingdom__eukaryota	97.4453	3.88971e-127	460.244	0	0	0	0	0	0	0	0	0	0	0	0	0	24	0	0	7	0	0	0	0	0	0	0	0	0	0	0	0	0	0	0	2	0	0	0	0	0	0	0	0	0	5	0	0
Zotu208	___af210819.1__gi:6563323_ ;k__fungi;p__basidiomycota;c__agaricomycetes;o__russulales;f__peniophoraceae;g__peniophora;s__peniophora aurantiaca;subkingdom__dikarya;superkingdom__eukaryota	91.9414	1.96771e-105	387.207	0	0	0	0	0	0	0	0	2	0	10	0	0	10	0	0	0	0	0	0	0	0	0	0	0	0	0	0	0	0	0	0	0	0	2	0	0	0	0	0	0	1	4	0	0
Zotu209	___hq607954.1__gi:312434432_ ;k__fungi;p__basidiomycota;c__agaricomycetes;o__polyporales;f__meruliaceae;g__phlebia;s__phlebia subserialis; subphylum__agaricomycotina;subkingdom__dikarya;superkingdom__eukaryota;	86.1702	3.04421e-84	316.876	0	0	0	0	0	0	0	0	0	0	0	0	0	0	0	0	0	0	0	0	0	0	0	0	0	0	0	0	0	0	0	0	0	0	17	1	0	0	7	0	5	1	0	0	0
Zotu210	rigidoporus crocatus ;k__fungi;p__basidiomycota;c__agaricomycetes;o__polyporales;f__meripilaceae;g__rigidoporus;s__rigidoporus crocatus; subphylum__agaricomycotina;subkingdom__dikarya;superkingdom__eukaryota;	82.6087	9.0606e-72	275.398	0	0	0	0	0	0	0	0	0	0	12	27	0	0	0	0	0	0	0	0	0	0	0	0	0	0	0	0	0	0	0	0	0	0	0	0	0	0	0	0	0	0	0	0	0
Zotu211	culex nigripalpus ;k__metazoa;p__arthropoda;c__insecta;o__diptera;f__culicidae;g__culex;s__culex nigripalpus;subgenus culex;tribe__culicini;subfamily__culicinae;superfamily__culicoidea;infraorder__culicomorpha;suborder__nematocera;infraclass endopterygota;subclass neoptera;superclass hexapoda;superkingdom__eukaryota	96.8689	0	858.788	0	0	0	0	0	0	0	0	0	0	1	1	2	0	3	0	0	0	0	1	0	1	0	0	0	0	0	0	0	0	0	1	0	1	1	1	0	0	0	0	0	0	0	0	0
Zotu212	culex pilosus ;k__metazoa;p__arthropoda;c__insecta;o__diptera;f__culicidae;g__culex;s__culex pilosus;subgenus mochlostyrax;tribe__culicini;subfamily__culicinae;superfamily__culicoidea;infraorder__culicomorpha;suborder__nematocera;infraclass endopterygota;subclass neoptera;superclass hexapoda;superkingdom__eukaryota	93.1507	5.47306e-20	104.078	0	0	0	0	21	0	0	0	0	0	0	0	0	0	0	0	0	0	0	0	0	0	0	0	0	0	0	0	0	0	0	0	1	0	0	0	0	0	0	0	0	0	0	0	0
Zotu213	culex nigripalpus ;k__metazoa;p__arthropoda;c__insecta;o__diptera;f__culicidae;g__culex;s__culex nigripalpus;subgenus culex;tribe__culicini;subfamily__culicinae;superfamily__culicoidea;infraorder__culicomorpha;suborder__nematocera;infraclass endopterygota;subclass neoptera;superclass hexapoda;superkingdom__eukaryota	96.332	0	837.148	0	0	0	0	1	0	3	1	0	0	2	25	219	16	14	0	1	9	1	18	1	13	0	0	0	1	0	0	1	0	0	0	1	6	5	24	30	0	3	0	0	0	6	0	0
Zotu214	___ay571031.1__gi:50346928_ ;k__fungi;p__basidiomycota;c__agaricomycetes;o__agaricales;f__tricholomataceae;g__calyptella;s__calyptella capula;subclass agaricomycetidae;subkingdom__dikarya;superkingdom__eukaryota	82.0339	5.19363e-69	267.283	0	0	0	0	0	0	0	0	0	0	0	0	30	0	0	0	0	0	0	0	0	0	0	0	0	0	0	0	0	0	0	0	0	0	0	0	0	0	1	0	0	0	0	0	0
Zotu215	___hq607954.1__gi:312434432_ ;k__fungi;p__basidiomycota;c__agaricomycetes;o__polyporales;f__meruliaceae;g__phlebia;s__phlebia subserialis; subphylum__agaricomycotina;subkingdom__dikarya;superkingdom__eukaryota;	99.631	9.49027e-135	485.491	0	0	0	0	0	0	0	0	0	0	0	0	0	8	0	0	0	0	0	0	0	0	0	0	0	0	0	0	0	0	0	0	0	0	0	0	3	3	0	2	0	0	0	0	0
Zotu216	culex nigripalpus ;k__metazoa;p__arthropoda;c__insecta;o__diptera;f__culicidae;g__culex;s__culex nigripalpus;subgenus culex;tribe__culicini;subfamily__culicinae;superfamily__culicoidea;infraorder__culicomorpha;suborder__nematocera;infraclass endopterygota;subclass neoptera;superclass hexapoda;superkingdom__eukaryota	94.8276	0	821.819	0	1	2	0	2	2	1	0	0	1	34	7	5	36	9	0	1	82	1	12	3	22	2	1	2	2	2	0	20	2	0	2	2	48	508	4	2	2	3	1	2	1	37	1	1
Zotu217	___jn164922.1__gi:357216417_ ;k__fungi;p__basidiomycota;c__agaricomycetes;o__polyporales;f__polyporaceae;g__trametes;s__trametes cubensis; subphylum__agaricomycotina;subkingdom__dikarya;superkingdom__eukaryota;	100	5.3364e-138	495.409	0	0	0	0	0	0	0	0	0	0	0	0	0	0	0	0	0	0	0	0	0	0	0	1	0	0	0	0	0	0	0	0	0	0	0	0	0	0	0	0	0	0	0	0	32
Zotu218	___fj487920.1__gi:218938069_ ;k__fungi;p__ascomycota;c__sordariomycetes;o__diaporthales;f__valsaceae;g__valsa;s__valsa brevispora;subclass sordariomycetidae;subphylum__pezizomycotina;subkingdom__dikarya;superkingdom__eukaryota	95.9259	1.79547e-118	430.488	0	0	0	1	0	0	0	0	0	0	0	0	0	0	0	0	0	1	4	0	0	0	0	0	0	0	0	0	23	0	0	5	0	0	0	0	0	0	0	0	0	0	0	0	0
Zotu219	___hq607954.1__gi:312434432_ ;k__fungi;p__basidiomycota;c__agaricomycetes;o__polyporales;f__meruliaceae;g__phlebia;s__phlebia subserialis; subphylum__agaricomycotina;subkingdom__dikarya;superkingdom__eukaryota;	76.2987	1.29077e-57	229.412	0	0	0	0	0	0	0	5	0	0	0	0	0	0	10	0	0	0	8	0	0	0	0	0	0	0	0	0	0	0	0	0	0	0	0	0	0	0	0	0	0	0	0	0	0
Zotu220	___fj478095.1__gi:218454071_ ;k__fungi;p__basidiomycota;c__agaricomycetes;o__agaricales;f__psathyrellaceae;g__psathyrella;s__psathyrella artemisiae;subclass agaricomycetidae;subkingdom__dikarya;superkingdom__eukaryota	100	5.02223e-158	562.134	0	0	0	0	0	0	0	0	0	0	0	0	0	0	0	0	0	0	0	0	0	0	0	0	0	0	0	0	0	0	0	0	0	0	0	0	0	0	0	0	0	0	0	0	0
Zotu221	___fj903297.1__gi:237641516_ ;k__fungi;p__basidiomycota;c__agaricomycetes;o__corticiales;f__corticiaceae;g__sistotrema;s__sistotrema brinkmannii;subkingdom__dikarya;superkingdom__eukaryota	86.7188	3.54458e-33	147.359	0	0	0	0	0	0	0	0	0	0	0	0	0	19	0	0	0	0	0	0	0	0	0	0	0	0	0	0	0	0	0	0	0	0	0	0	0	0	0	0	0	0	0	0	0
Zotu222	___af210819.1__gi:6563323_ ;k__fungi;p__basidiomycota;c__agaricomycetes;o__russulales;f__peniophoraceae;g__peniophora;s__peniophora aurantiaca;subkingdom__dikarya;superkingdom__eukaryota	91.4498	1.23146e-101	375.485	0	0	0	0	0	0	0	0	0	0	0	0	0	0	0	0	0	0	0	0	0	0	0	0	0	0	0	0	0	0	0	0	0	0	0	0	0	0	0	0	0	0	0	0	0
Zotu223	jatropha curcas ;k__viridiplantae;p__streptophyta;c__magnoliopsida;o__malpighiales;f__euphorbiaceae;g__jatropha;s__jatropha curcas; tribe__jatropheae;subfamily__crotonoideae;subphylum__streptophytina;superkingdom__eukaryota;	86.1111	2.14431	40.0587	0	0	0	0	0	0	0	0	0	0	0	0	0	0	0	0	0	0	0	0	0	0	64	0	0	0	0	0	0	0	0	0	0	0	0	0	0	0	0	0	0	0	0	0	0
Zotu224	___af237731.2__gi:13699894_ ;k__fungi;p__basidiomycota;c__agaricomycetes;o__hymenochaetales;f__hymenochaetaceae;g__inocutis;s__inocutis rheades;subkingdom__dikarya;superkingdom__eukaryota	82.2823	2.81201e-79	300.646	0	0	0	0	0	0	0	0	0	0	0	0	0	0	0	0	0	0	0	0	0	0	0	0	0	0	0	0	0	0	0	0	0	0	0	0	0	0	0	0	0	0	12	0	0
Zotu225	culex nigripalpus ;k__metazoa;p__arthropoda;c__insecta;o__diptera;f__culicidae;g__culex;s__culex nigripalpus;subgenus culex;tribe__culicini;subfamily__culicinae;superfamily__culicoidea;infraorder__culicomorpha;suborder__nematocera;infraclass endopterygota;subclass neoptera;superclass hexapoda;superkingdom__eukaryota	99.2233	0	911.988	1	1	2	0	1	1	3	0	1	0	70	1070	3	22	7	3	0	58	0	19	1	2	1	1	1	0	0	1	28	0	2	2	2	7	225	193	22	3	1	0	0	1	4	0	0
Zotu226	___aj560679.1__gi:46559598_ ;k__fungi;p__ascomycota;c__sordariomycetes;o__hypocreales;f__cordycipitaceae;g__beauveria;s__cordyceps bassiana;subclass hypocreomycetidae;subphylum__pezizomycotina;subkingdom__dikarya;superkingdom__eukaryota	100	5.49346e-118	428.685	0	0	0	0	0	0	0	0	1	0	0	0	0	0	0	0	0	0	0	0	0	0	0	0	0	0	0	0	0	0	0	29	0	0	0	0	0	0	0	0	0	0	0	0	0
Zotu227	culex nigripalpus ;k__metazoa;p__arthropoda;c__insecta;o__diptera;f__culicidae;g__culex;s__culex nigripalpus;subgenus culex;tribe__culicini;subfamily__culicinae;superfamily__culicoidea;infraorder__culicomorpha;suborder__nematocera;infraclass endopterygota;subclass neoptera;superclass hexapoda;superkingdom__eukaryota	94.7776	0	808.294	0	0	0	0	0	0	0	0	0	0	0	1	0	0	0	0	0	0	0	0	0	0	0	0	0	0	0	0	0	0	0	0	0	0	0	0	0	0	0	0	0	0	0	0	0
Zotu228	___am269796.1__gi:158934585_ ;k__fungi;p__basidiomycota;c__agaricomycetes;o__hymenochaetales;f__hymenochaetaceae;g__fuscoporia;s__fuscoporia gilva;subkingdom__dikarya;superkingdom__eukaryota	98.3923	2.42791e-149	533.28	4	0	0	0	0	0	0	0	1	0	0	5	3	0	0	0	2	0	0	0	0	0	0	0	0	0	0	0	0	0	0	26	0	0	0	0	0	4	2	0	0	0	0	0	0
Zotu229	___gu187509.1__gi:300394313_ ;k__fungi;p__basidiomycota;c__agaricomycetes;o__agaricales;f__radulomycetaceae;g__aphanobasidium;s__aphanobasidium pseudotsugae; subclass agaricomycetidae;subphylum__agaricomycotina;subkingdom__dikarya;superkingdom__eukaryota;	82.0122	8.79681e-73	279.005	0	0	0	0	0	0	0	0	0	0	0	0	8	26	0	0	0	0	0	0	0	0	0	0	0	0	0	0	0	0	0	0	0	0	0	0	0	0	0	0	0	0	0	0	0
Zotu230	___ay558595.1__gi:46810526_ ;k__fungi;p__basidiomycota;c__agaricomycetes;o__hymenochaetales;f__hymenochaetaceae;g__hymenochaete;s__hymenochaete denticulata;subkingdom__dikarya;superkingdom__eukaryota	90.6667	1.91479e-18	98.6682	0	0	0	0	0	0	0	0	0	0	0	0	0	0	0	0	0	30	0	0	0	0	0	0	0	0	0	0	0	0	0	0	0	0	0	0	0	0	0	0	0	0	0	0	0
Zotu231	___af210819.1__gi:6563323_ ;k__fungi;p__basidiomycota;c__agaricomycetes;o__russulales;f__peniophoraceae;g__peniophora;s__peniophora aurantiaca;subkingdom__dikarya;superkingdom__eukaryota	91.5751	8.36693e-104	382.699	0	0	0	0	0	0	0	0	0	0	0	0	0	0	0	0	0	0	0	0	0	0	0	0	0	0	0	0	0	0	0	0	0	0	0	0	0	0	0	0	0	0	0	0	0
Zotu232	sidera vulgaris ;k__fungi;p__basidiomycota;c__agaricomycetes;o__hymenochaetales;f__rickenellaceae;g__sidera;s__sidera vulgaris;subkingdom__dikarya;superkingdom__eukaryota	92.2535	7.45769e-48	196.952	0	0	0	0	0	0	0	0	0	0	0	0	0	0	0	0	0	0	0	0	0	0	0	14	0	11	0	0	16	0	0	0	0	0	0	0	0	1	0	0	0	0	0	0	0
Zotu233	culex nigripalpus ;k__metazoa;p__arthropoda;c__insecta;o__diptera;f__culicidae;g__culex;s__culex nigripalpus;subgenus culex;tribe__culicini;subfamily__culicinae;superfamily__culicoidea;infraorder__culicomorpha;suborder__nematocera;infraclass endopterygota;subclass neoptera;superclass hexapoda;superkingdom__eukaryota	97.4855	0	866.903	0	0	0	0	0	0	0	1	0	0	9	144	18	5	18	2	0	52	0	25	0	5	0	0	0	0	0	0	20	0	1	0	0	80	49	1	1170	0	0	1	0	1	4	0	0
Zotu234	ischnosiphon hirsutus ;k__viridiplantae;p__streptophyta;c__magnoliopsida;o__zingiberales;f__marantaceae;g__ischnosiphon;s__ischnosiphon hirsutus; subclass petrosaviidae;subphylum__streptophytina;superkingdom__eukaryota;	100	3.2329e-20	104.078	0	0	0	0	0	0	0	0	0	0	0	0	0	20	0	0	0	0	0	0	0	0	0	0	0	0	0	0	0	0	0	0	0	0	0	0	0	0	0	0	0	0	0	0	0
Zotu235	culex nigripalpus ;k__metazoa;p__arthropoda;c__insecta;o__diptera;f__culicidae;g__culex;s__culex nigripalpus;subgenus culex;tribe__culicini;subfamily__culicinae;superfamily__culicoidea;infraorder__culicomorpha;suborder__nematocera;infraclass endopterygota;subclass neoptera;superclass hexapoda;superkingdom__eukaryota	98.6381	0	890.347	4	3	4	3	5	4	0	1	4	3	8	25	59	1460	4	4	3	213	1	17	2	103	2	3	0	4	1	3	615	3	2	0	5	8	137	1164	94	1	2	2	1	1	41	1	1
Zotu236	___ay239214.1__gi:33694303_ ;k__fungi;p__ascomycota;c__taphrinomycetes;o__taphrinales;f__taphrinaceae;g__lalaria;s__lalaria inositophila;subphylum__taphrinomycotina;subkingdom__dikarya;superkingdom__eukaryota	99.5283	9.13564e-103	379.092	0	0	0	0	0	0	0	0	0	0	0	1	0	0	0	0	0	0	0	0	0	0	0	0	0	0	0	0	0	0	0	0	0	0	0	0	0	0	0	0	0	0	0	3	0
Zotu237	___ef175526.1__gi:140260217_ ;k__fungi;p__basidiomycota;c__agaricomycetes;o__agaricales;f__marasmiaceae;g__tetrapyrgos;s__tetrapyrgos subcinerea;subclass agaricomycetidae;subkingdom__dikarya;superkingdom__eukaryota	95.4704	2.54412e-123	446.718	0	0	0	0	0	0	0	0	0	0	0	0	0	0	11	0	0	0	0	0	0	0	0	0	0	0	0	0	0	0	0	0	0	0	0	0	0	0	0	0	0	0	7	0	0
Zotu238	___dq490627.1__gi:94962114_ ;k__fungi;p__basidiomycota;c__agaricomycetes;o__agaricales;f__porotheleaceae;g__hydropus;s__hydropus marginellus;superkingdom__eukaryota;subkingdom__dikarya;subphylum__agaricomycotina;subclass agaricomycetidae;	80.1802	5.3536e-76	289.825	0	0	0	0	0	0	1	0	0	0	0	0	0	0	0	0	0	0	0	0	0	0	36	2	0	0	0	0	0	0	0	0	0	0	0	0	0	0	0	0	0	0	0	0	0
Zotu239	sidera vulgaris ;k__fungi;p__basidiomycota;c__agaricomycetes;o__hymenochaetales;f__rickenellaceae;g__sidera;s__sidera vulgaris;subkingdom__dikarya;superkingdom__eukaryota	92.2535	7.45769e-48	196.952	0	0	0	0	1	0	0	0	0	0	0	0	0	1	0	0	0	0	0	0	0	0	0	0	0	0	11	0	1	0	0	20	0	0	0	0	0	0	2	0	0	0	0	0	0
Zotu240	___ay916686.1__gi:64475669_ ;k__fungi;p__basidiomycota;c__agaricomycetes;o__agaricales;f__marasmiaceae;g__chaetocalathus;s__chaetocalathus columellifer;subclass agaricomycetidae;subkingdom__dikarya;superkingdom__eukaryota	92.7481	5.4992e-100	370.075	0	0	0	0	0	0	0	0	0	0	5	0	0	0	0	0	0	0	0	0	0	0	23	0	0	0	0	0	0	0	0	0	0	0	0	0	3	0	0	0	0	0	0	0	0
Zotu241	engyodontium album ;k__fungi;p__ascomycota;c__ascomycota;o__ascomycota;f__ascomycota;g__engyodontium;s__engyodontium album;superkingdom__eukaryota;subkingdom__dikarya	100	4.23984e-126	455.735	0	0	0	0	0	0	0	0	0	0	0	0	1	0	0	0	0	0	1	0	0	0	0	0	0	0	0	0	0	0	0	0	0	0	0	0	0	0	0	0	0	0	25	0	0
Zotu242	neonothopanus nambi ;k__fungi;p__basidiomycota;c__agaricomycetes;o__agaricales;f__omphalotaceae;g__neonothopanus;s__neonothopanus nambi; subclass agaricomycetidae;subphylum__agaricomycotina;subkingdom__dikarya;superkingdom__eukaryota;	96.8454	2.7901e-142	510.738	0	0	0	0	0	0	0	0	0	0	0	0	0	0	0	0	0	0	0	0	0	0	0	0	0	0	0	0	0	1	0	0	0	0	0	0	0	0	0	0	0	0	28	0	0
Zotu243	neonothopanus nambi ;k__fungi;p__basidiomycota;c__agaricomycetes;o__agaricales;f__omphalotaceae;g__neonothopanus;s__neonothopanus nambi; subclass agaricomycetidae;subphylum__agaricomycotina;subkingdom__dikarya;superkingdom__eukaryota;	97.1609	6.56169e-144	515.246	0	0	0	0	0	0	0	0	0	0	20	0	0	0	0	0	0	0	0	0	0	0	0	0	0	0	0	0	0	0	0	0	0	0	0	0	0	0	0	0	0	0	0	0	0
Zotu244	___af200240.1__gi:6470316_ ;k__fungi;p__basidiomycota;c__agaricomycetes;o__hymenochaetales;f__hymenochaetaceae;g__phellinus;s__phellinus tremulae;subkingdom__dikarya;superkingdom__eukaryota	99.1968	1.2767e-120	437.702	14	0	0	0	0	0	0	0	1	0	0	0	0	36	10	0	3	0	0	0	0	0	0	4	0	3	0	0	3	0	0	0	0	11	1	0	0	0	0	0	4	0	0	0	0
Zotu245	___hq599594.1__gi:313800033_ ;k__fungi;p__ascomycota;c__dothideomycetes;o__mycosphaerellales;f__teratosphaeriaceae;g__phaeothecoidea;s__phaeothecoidea melaleuca; subclass dothideomycetidae;subphylum__pezizomycotina;subkingdom__dikarya;superkingdom__eukaryota;	85.8407	2.36711e-65	254.66	0	0	0	0	0	0	0	0	0	0	0	0	0	0	0	0	0	0	0	0	0	0	0	0	0	0	0	0	0	0	0	0	0	9	0	0	0	0	0	0	0	0	0	4	0
Zotu246	___ay571061.1__gi:50346958_ ;k__fungi;p__basidiomycota;c__agaricomycetes;o__agaricales;f__tricholomataceae;g__resupinatus;s__resupinatus conspersus;subclass agaricomycetidae;subkingdom__dikarya;superkingdom__eukaryota	86.194	7.64803e-79	299.744	0	0	0	0	0	0	0	0	0	0	0	0	0	0	0	0	0	0	0	0	0	0	0	0	0	0	0	0	1	0	0	0	0	0	0	0	0	0	0	0	1	0	0	0	0
Zotu247	___ab361644.1__gi:157678733_ ;k__fungi;p__basidiomycota;c__agaricomycetes;o__polyporales;f__phanerochaetaceae;g__phanerochaete;s__phanerochaete chrysosporium;subkingdom__dikarya;superkingdom__eukaryota	100	2.69635e-135	486.393	0	0	0	0	0	0	0	0	0	0	0	0	0	0	0	0	0	0	0	0	0	0	0	0	0	0	0	0	0	0	0	0	0	0	0	0	0	9	0	3	0	4	0	0	0
Zotu248	___fj882040.1__gi:269969917_ ;k__fungi;p__basidiomycota;c__agaricomycetes;o__russulales;f__peniophoraceae;g__peniophora;s__peniophora laxitexta;subkingdom__dikarya;superkingdom__eukaryota	98.6547	5.63759e-106	389.912	0	0	0	0	0	0	0	0	0	0	0	0	0	0	0	0	0	0	0	0	0	0	0	0	0	0	0	0	0	0	0	0	0	0	0	0	0	0	0	0	0	0	8	0	0
Zotu249	mythimna separata ;k__metazoa;p__arthropoda;c__insecta;o__lepidoptera;f__noctuidae;g__mythimna;s__mythimna separata;subfamily__hadeninae;superfamily__noctuoidea;parvorder__heteroneura;infraorder__neolepidoptera;suborder__glossata;superorder__amphiesmenoptera;infraclass endopterygota;subclass neoptera;superclass hexapoda;superkingdom__eukaryota	95.6522	4.50027	38.2554	0	0	2	0	5	0	0	0	0	0	0	0	0	0	0	0	0	0	0	0	0	0	0	0	0	37	0	0	0	1	12	0	0	0	0	0	0	0	0	0	0	0	0	0	0
Zotu250	culex nigripalpus ;k__metazoa;p__arthropoda;c__insecta;o__diptera;f__culicidae;g__culex;s__culex nigripalpus;subgenus culex;tribe__culicini;subfamily__culicinae;superfamily__culicoidea;infraorder__culicomorpha;suborder__nematocera;infraclass endopterygota;subclass neoptera;superclass hexapoda;superkingdom__eukaryota	93.2171	0	776.735	0	0	0	0	1	0	0	0	0	0	3	6	61	1	0	0	0	1	0	5	0	1	0	0	0	1	0	0	1	0	0	0	0	1	0	1	1	0	1	0	0	0	1	0	0
Zotu251	___jf951150.1__gi:338809112_ ;k__fungi;p__ascomycota;c__dothideomycetes;o__capnodiales;f__capnodiaceae;g__leptoxyphium;s__leptoxyphium kurandae;subclass dothideomycetidae;subphylum__pezizomycotina;subkingdom__dikarya;superkingdom__eukaryota	100	2.03907e-110	403.438	0	0	0	0	0	0	0	0	0	0	0	0	0	0	0	0	0	0	0	0	0	0	0	0	0	0	0	0	0	0	0	0	0	0	0	1	0	0	0	0	0	0	0	0	0
Zotu252	___gu222266.1__gi:281376773_ ;k__fungi;p__basidiomycota;c__agaricomycetes;o__polyporales;f__grifolaceae;g__grifola;s__grifola sordulenta; subphylum__agaricomycotina;subkingdom__dikarya;superkingdom__eukaryota;	84.8708	4.84697e-75	287.12	0	0	0	0	0	0	0	0	0	0	0	0	0	0	0	0	0	0	0	0	0	0	0	0	1	17	0	0	0	0	0	0	0	0	0	0	0	0	0	0	0	0	0	0	0
Zotu253	___ab041236.1__gi:13661066_ ;k__fungi;p__ascomycota;c__dothideomycetes;o__botryosphaeriales;f__phyllostictaceae;g__phyllosticta;s__guignardia mangiferae;subphylum__pezizomycotina;subkingdom__dikarya;superkingdom__eukaryota	99.6732	1.08647e-153	548.609	0	0	0	0	0	0	0	0	0	0	0	0	0	0	0	0	0	0	0	0	0	0	0	0	0	0	0	0	26	0	0	0	0	0	0	0	0	0	0	0	0	0	0	0	0
Zotu254	culex nigripalpus ;k__metazoa;p__arthropoda;c__insecta;o__diptera;f__culicidae;g__culex;s__culex nigripalpus;subgenus culex;tribe__culicini;subfamily__culicinae;superfamily__culicoidea;infraorder__culicomorpha;suborder__nematocera;infraclass endopterygota;subclass neoptera;superclass hexapoda;superkingdom__eukaryota	96.7118	0	847.968	0	0	0	1	0	1	0	0	0	0	7	5	8	1	30	0	0	5	0	7	3	2	0	0	0	0	0	0	6	0	0	2	0	5	3	7	3	0	0	1	0	0	5	1	0
Zotu255	___hq270178.1__gi:307948750_ ;k__fungi;p__basidiomycota;c__agaricomycetes;o__corticiales;f__corticiaceae;g__waitea;s__waitea circinata; subphylum__agaricomycotina;subkingdom__dikarya;superkingdom__eukaryota;subphylum__agaricomycotina;subkingdom__dikarya;superkingdom__eukaryota;subphylum__agaricomycotina;subkingdom__dikarya;superkingdom__eukaryota;subphylum__agaricomycotina;subkingdom__dikarya;sup…	100	8.27697e-136	488.196	0	0	0	0	0	0	0	0	0	0	0	0	0	0	0	0	0	0	0	0	0	0	0	0	0	27	0	0	0	0	0	0	0	0	0	0	0	0	0	0	0	0	0	0	0
Zotu256	amaranthus tricolor ;k__viridiplantae;p__streptophyta;c__magnoliopsida;o__caryophyllales;f__amaranthaceae;g__amaranthus;s__amaranthus tricolor; subphylum__streptophytina;superkingdom__eukaryota;	92	3.45133	37.3537	0	0	0	0	0	0	0	0	0	0	0	0	0	0	0	0	0	0	0	0	0	0	0	0	0	0	0	0	0	0	0	0	2	0	0	0	0	0	0	0	0	0	0	0	0
Zotu257	___ef429238.1__gi:149208235_ ;k__fungi;p__basidiomycota;c__agaricomycetes;o__hymenochaetales;f__hymenochaetaceae;g__phellinus;s__phellinus punctatus;subkingdom__dikarya;superkingdom__eukaryota	100	2.46396e-162	576.561	0	0	0	0	1	0	0	0	0	0	0	15	4	0	0	0	0	0	0	0	0	0	0	0	0	0	0	0	0	0	0	0	0	0	0	0	0	0	0	0	0	0	0	0	0
Zotu258	___eu232219.1__gi:166361546_ ;k__fungi;p__basidiomycota;c__agaricomycetes;o__polyporales;f__polyporaceae;g__ganoderma;s__ganoderma applanatum; superkingdom__bacteria;species__candidatus gloeomargarita;superkingdom__bacteria;strain__candidatus gloeomargarita;species__candidatus gloeomargarita;superkingdom__bacteria;species__candidatus gloeomargarita;subfamily__melolonthinae;superfamily__scarabaeoi…	91.9431	3.15516e-77	293.432	0	0	0	0	0	0	0	0	0	0	0	0	0	17	0	0	0	0	0	0	0	0	0	0	0	0	0	0	0	0	0	0	0	1	0	0	0	0	0	0	0	0	0	0	0
Zotu259	vaucheria litorea ;k__eukaryota;p__xanthophyceae;c__xanthophyceae;o__vaucheriales;f__vaucheriaceae;g__vaucheria;s__vaucheria litorea;superkingdom__eukaryota	98.3333	3.3439e-20	104.98	0	0	0	0	0	0	0	0	0	0	0	0	0	0	0	0	0	0	0	0	0	0	0	0	0	0	0	0	0	0	0	0	0	0	0	0	0	0	0	0	0	0	0	0	0
Zotu260	___u66455.1__gi:2289063_ ;k__fungi;p__basidiomycota;c__agaricomycetes;o__agaricales;f__hygrophoraceae;g__arrhenia;s__arrhenia velutipes;superkingdom__eukaryota;subkingdom__dikarya;subphylum__agaricomycotina;subclass agaricomycetidae;	75.5474	4.79382e-37	159.983	0	0	0	0	19	0	0	0	0	0	0	0	0	0	0	0	0	0	0	0	0	0	0	0	0	0	0	0	0	0	0	0	0	3	0	0	0	0	0	0	0	0	0	0	0
Zotu261	___dq911612.1__gi:115291780_ ;k__fungi;p__basidiomycota;c__agaricomycetes;o__corticiales;f__corticiaceae;g__haplotrichum;s__haplotrichum conspersum;subkingdom__dikarya;superkingdom__eukaryota	83.0769	4.98657e-43	179.82	0	0	0	0	0	0	0	0	0	0	0	0	0	0	0	0	0	0	0	0	0	0	0	0	0	0	0	0	0	0	0	0	0	0	0	0	0	0	0	0	0	0	0	0	0
Zotu262	___ab306311.1__gi:166197408_ ;k__fungi;p__basidiomycota;c__agaricomycetes;o__agaricales;f__psathyrellaceae;g__psathyrella;s__psathyrella candolleana;subclass agaricomycetidae;subkingdom__dikarya;superkingdom__eukaryota	97.8659	4.35202e-159	566.642	0	0	0	0	0	0	0	0	0	0	0	0	0	0	0	0	0	0	0	0	0	0	0	0	0	0	0	0	0	0	0	0	0	0	0	0	0	0	0	0	0	0	18	0	0
Zotu263	hyphoderma obtusiforme ;k__fungi;p__basidiomycota;c__agaricomycetes;o__polyporales;f__hyphodermataceae;g__hyphoderma;s__hyphoderma obtusiforme; subphylum__agaricomycotina;subkingdom__dikarya;superkingdom__eukaryota;	79.5053	3.29645e-58	231.216	0	0	1	0	0	0	0	0	0	0	0	0	0	0	0	0	0	0	0	0	0	0	0	0	0	0	0	0	0	0	0	0	0	0	0	0	0	0	0	0	0	0	11	3	0
Zotu264	culex nigripalpus ;k__metazoa;p__arthropoda;c__insecta;o__diptera;f__culicidae;g__culex;s__culex nigripalpus;subgenus culex;tribe__culicini;subfamily__culicinae;superfamily__culicoidea;infraorder__culicomorpha;suborder__nematocera;infraclass endopterygota;subclass neoptera;superclass hexapoda;superkingdom__eukaryota	93.8815	0	795.67	1	0	1	0	0	0	0	0	0	0	1	0	0	0	1	1	0	1	0	53	0	0	0	1	0	0	0	0	0	0	0	0	0	1	298	182	0	0	0	0	0	1	65	1	0
Zotu265	___eu622841.1__gi:187671968_ ;k__fungi;p__basidiomycota;c__agaricomycetes;o__corticiales;f__corticiaceae;g__laetisaria;s__laetisaria arvalis;subkingdom__dikarya;superkingdom__eukaryota	81.0909	6.09627e-61	239.331	0	0	0	0	0	0	0	0	0	0	0	0	0	0	0	0	0	0	0	0	0	0	0	0	0	14	0	0	0	0	0	0	0	0	0	0	0	0	0	0	0	0	0	0	0
Zotu266	___hq127243.1__gi:320148811_ ;k__fungi;p__basidiomycota;c__agaricomycetes;o__polyporales;f__polyporaceae;g__grammothele;s__grammothele fuligo;subkingdom__dikarya;superkingdom__eukaryota	99.1903	1.17889e-120	437.702	0	0	0	0	0	0	0	0	0	0	19	0	0	1	0	0	0	0	0	0	0	0	0	0	0	0	0	0	1	0	0	0	0	0	0	0	0	0	0	0	0	0	0	1	0
Zotu267	___fj810171.1__gi:226346625_ ;k__fungi;p__basidiomycota;c__agaricomycetes;o__hymenochaetales;f__hymenochaetaceae;g__hymenochaete;s__hymenochaete adusta;subkingdom__dikarya;superkingdom__eukaryota	85.0267	2.69064e-105	388.109	0	0	0	0	0	0	0	0	0	0	0	0	0	0	0	0	0	0	0	0	0	0	0	0	0	0	0	0	0	30	0	0	0	0	0	0	0	0	0	0	0	0	0	0	0
Zotu268	___fj852631.1__gi:226440794_ ;k__fungi;p__ascomycota;c__dothideomycetes;o__pleosporales;f__corynesporascaceae;g__corynespora;s__corynespora cassiicola;subclass pleosporomycetidae;subphylum__pezizomycotina;subkingdom__dikarya;superkingdom__eukaryota	82.7434	1.31299e-55	222.199	0	0	0	0	0	0	0	0	0	0	0	0	0	0	0	0	0	0	0	0	0	0	5	3	0	0	0	0	0	1	0	0	0	0	0	0	0	0	0	0	0	2	7	0	0
Zotu269	___am269796.1__gi:158934585_ ;k__fungi;p__basidiomycota;c__agaricomycetes;o__hymenochaetales;f__hymenochaetaceae;g__fuscoporia;s__fuscoporia gilva;subkingdom__dikarya;superkingdom__eukaryota	90.7937	4.71208e-114	416.061	0	0	0	0	0	0	0	0	0	0	0	0	0	0	0	0	0	0	0	0	0	0	0	0	0	0	0	0	0	0	0	0	0	0	0	0	31	0	0	0	0	0	0	0	0
Zotu270	___u85799.1__gi:4235186_ ;k__fungi;p__basidiomycota;c__agaricomycetes;o__atheliales;f__atheliaceae;g__athelia;s__athelia pellicularis;subclass agaricomycetidae;subkingdom__dikarya;superkingdom__eukaryota	92.0863	1.33684e-107	395.322	0	0	0	0	0	0	0	0	0	0	0	0	6	0	0	0	0	0	0	0	0	0	0	0	0	0	0	0	0	0	0	0	0	0	0	0	0	0	0	0	0	0	15	0	0
Zotu271	___eu118651.1__gi:157057303_ ;k__fungi;p__basidiomycota;c__agaricomycetes;o__russulales;f__peniophoraceae;g__peniophora;s__peniophora pini;subkingdom__dikarya;superkingdom__eukaryota	95.2206	1.83367e-118	431.39	0	0	0	0	0	0	0	0	0	0	0	0	0	0	0	0	0	0	0	0	0	0	0	0	0	0	0	0	0	0	0	0	14	0	0	0	0	0	0	0	0	0	0	0	0
Zotu272	sebacina vermifera ;k__fungi;p__basidiomycota;c__agaricomycetes;o__sebacinales;f__serendipitaceae;g__serendipita;s__sebacina vermifera; subphylum__agaricomycotina;subkingdom__dikarya;superkingdom__eukaryota;	78.7986	4.06152e-51	207.772	23	0	0	0	0	0	0	0	0	0	0	0	0	0	0	0	0	0	0	0	0	0	0	0	0	0	0	0	0	0	0	0	0	0	0	0	0	0	0	0	0	0	0	0	0
Zotu273	___fj882040.1__gi:269969917_ ;k__fungi;p__basidiomycota;c__agaricomycetes;o__russulales;f__peniophoraceae;g__peniophora;s__peniophora laxitexta;subkingdom__dikarya;superkingdom__eukaryota	98.2063	6.86799e-105	385.404	0	0	0	0	0	0	0	0	0	0	0	0	16	0	0	0	0	0	0	0	0	0	0	0	0	6	0	0	0	0	0	0	0	0	0	0	0	1	0	0	0	0	0	0	9
Zotu274	___hm536095.1__gi:317408930_ ;k__fungi;p__basidiomycota;c__agaricomycetes;o__gloeophyllales;f__polyporaceae;g__heliocybe;s__heliocybe sulcata; subphylum__agaricomycotina;subkingdom__dikarya;superkingdom__eukaryota;	71.2727	9.34193e-21	105.882	0	0	0	0	0	0	0	0	0	0	0	0	0	0	0	0	0	0	0	0	0	0	0	0	0	0	0	0	0	0	0	0	0	0	0	0	0	0	0	0	0	0	21	0	0
Zotu275	___ay509551.1__gi:40846329_ ;k__fungi;p__basidiomycota;c__agaricomycetes;o__auriculariales;f__exidiaceae;g__ductifera;s__ductifera sucina;subkingdom__dikarya;superkingdom__eukaryota	78.5388	2.52304e-39	167.196	0	0	0	0	0	0	0	0	0	0	0	0	0	0	0	0	0	0	0	0	0	0	0	0	0	0	0	0	0	0	0	0	0	0	0	0	0	0	0	0	0	0	0	0	0
Zotu276	___ab615456.1__gi:356995776_ ;k__fungi;p__basidiomycota;c__agaricomycetes;o__gloeophyllales;f__gloeophyllaceae;g__neolentinus;s__neolentinus lepideus;subkingdom__dikarya;superkingdom__eukaryota	98.008	2.64204e-116	424.176	0	0	0	0	0	0	0	1	0	0	0	0	0	0	0	0	0	0	0	0	0	0	0	12	0	0	0	0	0	0	0	0	0	0	0	0	0	0	0	0	0	0	0	0	0
Zotu277	___dq340326.1__gi:92110594_ ;k__fungi;p__basidiomycota;c__agaricomycetes;o__hymenochaetales;f__schizoporaceae;g__hyphodontia;s__hyphodontia sambuci; subphylum__agaricomycotina;subkingdom__dikarya;superkingdom__eukaryota;	84.375	2.6491e-72	277.202	0	0	0	0	0	0	0	0	0	0	0	0	0	0	0	0	0	0	0	0	0	0	0	0	0	0	6	0	0	0	0	0	0	0	4	0	22	0	0	0	0	0	0	0	0
Zotu278	culex nigripalpus ;k__metazoa;p__arthropoda;c__insecta;o__diptera;f__culicidae;g__culex;s__culex nigripalpus;subgenus culex;tribe__culicini;subfamily__culicinae;superfamily__culicoidea;infraorder__culicomorpha;suborder__nematocera;infraclass endopterygota;subclass neoptera;superclass hexapoda;superkingdom__eukaryota	96.3391	0	851.575	2	0	0	0	0	2	1	1	1	0	14	2	2	6	148	1	0	6	0	1663	1	2	0	1	0	0	0	1	4	0	0	3	0	0	5	2	2	0	0	1	0	1	3	1	1
Zotu279	___eu232219.1__gi:166361546_ ;k__fungi;p__basidiomycota;c__agaricomycetes;o__polyporales;f__polyporaceae;g__ganoderma;s__ganoderma applanatum; superkingdom__bacteria;species__candidatus gloeomargarita;superkingdom__bacteria;strain__candidatus gloeomargarita;species__candidatus gloeomargarita;superkingdom__bacteria;species__candidatus gloeomargarita;subfamily__melolonthinae;superfamily__scarabaeoi…	90.6977	4.76482e-75	286.219	0	0	0	0	0	0	1	0	0	0	0	0	0	1	0	0	0	0	0	0	0	0	0	0	0	1	0	2	0	0	0	0	0	11	0	0	0	0	0	0	0	0	14	0	0
Zotu280	___ef175514.1__gi:140260205_ ;k__fungi;p__basidiomycota;c__agaricomycetes;o__agaricales;f__omphalotaceae;g__marasmiellus;s__marasmiellus candidus; subclass agaricomycetidae;subphylum__agaricomycotina;subkingdom__dikarya;superkingdom__eukaryota;	92.6316	6.26904e-112	409.749	0	0	0	0	0	0	0	0	0	0	0	0	0	0	0	0	0	0	0	0	0	0	0	0	0	0	0	0	0	0	0	0	0	0	0	0	0	0	0	0	0	0	18	0	0
Zotu281	pyrofomes demidoffii ;k__fungi;p__basidiomycota;c__agaricomycetes;o__polyporales;f__polyporaceae;g__pyrofomes;s__pyrofomes demidoffii;subkingdom__dikarya;superkingdom__eukaryota	79.3919	7.566e-54	215.887	0	0	0	0	0	0	0	0	0	0	0	0	14	0	0	0	0	0	0	0	0	0	0	0	0	0	0	0	0	0	0	0	0	0	0	0	0	0	0	0	0	0	0	0	0
Zotu282	___ay129342.1__gi:27461740_ ;k__fungi;p__basidiomycota;c__agaricomycetes;o__agaricales;f__strophariaceae;g__psilocybe;s__psilocybe cubensis;subclass agaricomycetidae;subkingdom__dikarya;superkingdom__eukaryota	100	9.04798e-155	551.314	0	0	0	0	0	0	0	0	0	0	0	0	0	0	1	0	0	0	0	0	0	0	0	0	0	0	0	0	0	0	0	0	0	0	0	0	0	0	0	0	0	0	0	0	0
Zotu283	___af516601.1__gi:33325356_ ;k__fungi;p__basidiomycota;c__agaricomycetes;o__polyporales;f__polyporaceae;g__pseudofavolus;s__pseudofavolus cucullatus;subkingdom__dikarya;superkingdom__eukaryota	93.6877	1.13672e-121	441.308	0	0	0	0	0	0	0	0	0	0	0	0	0	0	0	0	0	0	0	0	0	0	0	0	0	0	0	0	0	0	0	0	0	0	0	0	0	0	0	0	1	0	17	0	0
Zotu284	___fj381698.1__gi:228485056_ ;k__fungi;p__ascomycota;c__saccharomycetes;o__saccharomycetales;f__phaffomycetaceae;g__cyberlindnera;s__candida mycetangii;subphylum__saccharomycotina;subkingdom__dikarya;superkingdom__eukaryota	92.0949	3.97512e-95	352.943	0	0	0	0	0	0	0	0	0	0	0	0	0	0	0	0	0	0	0	0	0	0	0	0	0	21	0	0	0	0	0	0	0	0	0	0	0	0	0	0	0	0	0	0	0
Zotu285	rhizoctonia solani ;k__fungi;p__basidiomycota;c__agaricomycetes;o__cantharellales;f__ceratobasidiaceae;g__rhizoctonia;s__rhizoctonia solani;subkingdom__dikarya;superkingdom__eukaryota	99.3197	6.09467e-144	515.246	0	0	0	0	0	0	0	0	0	0	0	0	0	0	24	0	0	0	0	0	0	0	0	0	0	0	0	0	0	0	0	0	0	0	0	0	0	0	0	0	0	0	0	0	0
Zotu286	___af291284.1__gi:14334007_ ;k__fungi;p__basidiomycota;c__agaricomycetes;o__auriculariales;f__exidiaceae;g__heterochaete;s__heterochaete shearii;subkingdom__dikarya;superkingdom__eukaryota	100	7.9947e-116	421.471	0	0	0	0	0	0	0	0	0	0	0	0	1	0	0	0	0	0	0	0	0	0	0	0	0	0	0	0	0	0	0	0	0	16	0	0	0	0	0	0	0	0	0	0	0
Zotu287	___gq169764.1__gi:241912466_ ;k__fungi;p__ascomycota;c__dothideomycetes;o__pleosporales;f__phaeosphaeriaceae;g__phaeosphaeriopsis;s__phaeosphaeriopsis musae;suborder__pleosporineae;subclass pleosporomycetidae;subphylum__pezizomycotina;subkingdom__dikarya;superkingdom__eukaryota	99	3.79618e-94	349.336	0	0	0	0	0	0	0	0	0	0	0	0	0	14	0	0	0	1	0	0	0	0	0	0	0	0	0	0	0	0	0	0	0	0	0	0	1	0	0	0	0	0	0	0	0
Zotu288	___eu118622.1__gi:157057274_ ;k__fungi;p__basidiomycota;c__agaricomycetes;o__agaricales;f__cystostereaceae;g__cystidiodontia;s__cystidiodontia laminifera; subclass agaricomycetidae;subphylum__agaricomycotina;subkingdom__dikarya;superkingdom__eukaryota;	82.9861	9.20913e-72	275.398	0	0	0	0	0	0	0	1	0	0	0	22	0	0	11	0	0	0	0	0	0	0	0	0	0	0	0	0	0	0	0	1	1	0	0	0	0	0	0	0	0	0	7	0	0
Zotu289	___fj430590.1__gi:238056460_ ;k__fungi;p__ascomycota;c__sordariomycetes;o__xylariales;f__xylariales;g__diatrypasimilis;s__diatrypasimilis australiensis;superkingdom__eukaryota;subkingdom__dikarya;subphylum__pezizomycotina;subclass xylariomycetidae	79.0441	6.38585e-55	220.396	0	0	0	0	0	0	0	0	0	0	0	0	0	0	14	0	0	0	0	0	0	0	0	0	0	0	0	0	0	0	0	0	0	0	0	0	0	0	0	0	0	0	0	0	0
Zotu290	___af210819.1__gi:6563323_ ;k__fungi;p__basidiomycota;c__agaricomycetes;o__russulales;f__peniophoraceae;g__peniophora;s__peniophora aurantiaca;subkingdom__dikarya;superkingdom__eukaryota	91.5751	8.36693e-104	382.699	0	0	0	0	0	0	0	0	0	0	0	0	0	0	0	0	0	0	0	0	0	0	0	0	0	0	0	0	0	0	0	0	0	0	0	0	0	0	0	0	0	0	0	0	0
Zotu291	___eu219559.1__gi:159024208_ ;k__fungi;p__ascomycota;c__sordariomycetes;o__hypocreales;f__nectriaceae;g__fusarium;s__fusarium oxysporum;subclass hypocreomycetidae;subphylum__pezizomycotina;subkingdom__dikarya;superkingdom__eukaryota	75	8.18384e-34	149.163	0	0	0	0	0	0	0	0	0	0	0	0	0	11	0	0	0	0	0	0	0	0	12	6	0	0	0	0	0	0	0	0	0	0	0	0	0	0	0	0	0	0	0	0	0
Zotu292	inocybe cf. rimosa tenn 062716 ;k__fungi;p__basidiomycota;c__agaricomycetes;o__agaricales;f__inocybaceae;g__inocybe;s__inocybe rimosa;subclass agaricomycetidae;subkingdom__dikarya;superkingdom__eukaryota	79.4212	3.05834e-59	234.823	0	0	0	0	0	0	0	0	0	0	0	0	0	0	0	26	0	0	0	0	0	0	0	0	0	0	0	0	0	0	0	0	0	0	0	0	0	0	0	0	0	0	0	0	0
Zotu293	___ef175555.1__gi:140260246_ ;k__fungi;p__basidiomycota;c__agaricomycetes;o__agaricales;f__marasmiaceae;g__tetrapyrgos;s__tetrapyrgos subcinerea;subclass agaricomycetidae;subkingdom__dikarya;superkingdom__eukaryota	94.7735	1.30244e-120	437.702	0	0	0	0	0	0	0	0	0	0	0	0	0	0	0	0	0	0	0	0	0	0	0	0	0	0	0	0	0	0	0	0	0	0	0	0	0	0	0	0	0	0	0	0	0
Zotu294	leptospora rubella ;k__fungi;p__ascomycota;c__dothideomycetes;o__dothideomycetes;f__dothideomycetes;g__leptospora;s__leptospora rubella;superkingdom__eukaryota;subkingdom__dikarya;subphylum__pezizomycotina	92.7273	5.66098e-106	389.912	0	0	0	0	0	0	0	0	0	0	0	0	0	0	19	0	0	0	0	0	0	0	0	0	0	1	0	0	0	0	0	0	0	0	0	0	0	0	0	0	0	0	0	0	0
Zotu295	___ay854086.1__gi:57232720_ ;k__fungi;p__basidiomycota;c__agaricomycetes;o__polyporales;f__phanerochaetaceae;g__phanerochaete;s__phanerochaete chrysosporium;subkingdom__dikarya;superkingdom__eukaryota	87.7698	2.12897e-92	344.828	0	0	11	0	0	0	0	0	0	0	0	0	0	0	0	0	0	0	0	0	0	0	0	0	0	0	0	0	0	0	0	0	0	0	0	0	0	0	0	0	0	0	0	0	0
Zotu296	___u68314.1__gi:3540222_ ;k__fungi;p__ascomycota;c__eurotiomycetes;o__onygenales;f__ascosphaeraceae;g__ascosphaera;s__ascosphaera atra;subclass eurotiomycetidae;subphylum__pezizomycotina;subkingdom__dikarya;superkingdom__eukaryota	100	1.12152e-07	62.6008	0	0	0	0	0	0	0	0	0	0	0	0	0	0	0	0	0	0	0	0	0	0	0	0	0	0	0	0	0	0	3	17	0	0	0	1	0	0	0	0	0	0	0	0	0
Zotu297	___fj810171.1__gi:226346625_ ;k__fungi;p__basidiomycota;c__agaricomycetes;o__hymenochaetales;f__hymenochaetaceae;g__hymenochaete;s__hymenochaete adusta;subkingdom__dikarya;superkingdom__eukaryota	88.2667	1.15693e-122	444.915	0	0	0	0	0	0	0	0	0	0	0	0	0	0	0	0	0	0	0	0	0	0	0	0	0	0	0	0	0	0	0	0	0	0	0	0	0	0	0	0	0	0	33	0	0
Zotu298	___hq441577.1__gi:332015805_ ;k__fungi;p__basidiomycota;c__agaricomycetes;o__auriculariales;f__auriculariales;g__oliveonia;s__oliveonia pauxilla;superkingdom__eukaryota;subkingdom__dikarya	83.6	2.65845e-65	253.758	0	0	0	0	0	0	0	0	0	0	0	0	0	0	0	0	0	0	1	0	0	0	0	0	0	0	0	0	17	0	0	0	0	0	0	0	0	0	0	0	0	0	0	0	0
Zotu299	___eu873528.1__gi:214014125_ ;k__fungi;p__ascomycota;c__sordariomycetes;o__sordariomycetes;f__sordariomycetes;g__dendroclathra;s__dendroclathra lignicola; subclass hypocreomycetidae;subphylum__pezizomycotina;subkingdom__dikarya;superkingdom__eukaryota;	85.6522	8.38914e-65	252.856	0	0	0	0	0	0	0	0	0	0	0	0	0	0	0	0	0	0	0	0	14	0	0	0	0	0	0	0	0	0	0	0	0	0	0	0	0	0	0	0	0	0	0	0	0
Zotu300	___dq826737.1__gi:110951114_ ;k__fungi;p__ascomycota;c__eurotiomycetes;o__chaetothyriales;f__herpotrichiellaceae;g__capronia;s__capronia pilosella;subclass chaetothyriomycetidae;subphylum__pezizomycotina;subkingdom__dikarya;superkingdom__eukaryota	76.7606	1.08939e-14	86.0446	0	0	0	0	0	0	0	0	0	0	0	0	0	0	0	0	0	0	0	0	0	0	0	0	0	0	0	0	0	22	0	0	0	0	0	0	0	0	0	0	0	0	14	0	0
Zotu301	___jf440573.1__gi:328942601_ ;k__fungi;p__basidiomycota;c__agaricomycetes;o__russulales;f__peniophoraceae;g__peniophora;s__peniophora cinerea;subkingdom__dikarya;superkingdom__eukaryota	85.7143	2.69214e-78	297.94	0	0	0	0	0	0	0	0	1	0	0	0	0	0	0	0	0	0	0	0	0	0	0	0	0	0	12	0	0	0	0	0	0	0	0	0	0	0	0	0	0	0	0	0	0
Zotu302	___hq608034.1__gi:312434512_ ;k__fungi;p__ascomycota;c__dothideomycetes;o__pleosporales;f__pleosporaceae;g__curvularia;s__cochliobolus australiensis;suborder__pleosporineae;subclass pleosporomycetidae;subphylum__pezizomycotina;subkingdom__dikarya;superkingdom__eukaryota	100	5.49346e-118	428.685	0	0	0	0	0	0	0	0	0	0	0	0	0	0	0	0	0	0	0	0	0	0	0	0	0	0	0	0	0	0	0	0	0	0	0	0	0	0	1	0	0	2	0	4	1
Zotu303	nigroporus vinosus ;k__fungi;p__basidiomycota;c__agaricomycetes;o__polyporales;f__steccherinaceae;g__nigroporus;s__nigroporus vinosus; subphylum__agaricomycotina;subkingdom__dikarya;superkingdom__eukaryota;	96.9388	1.03998e-134	484.589	0	0	0	0	0	0	0	0	0	0	0	0	0	0	0	0	0	0	0	0	0	0	0	0	0	22	0	0	0	0	0	0	0	0	0	0	0	0	0	0	0	0	0	0	0
Zotu305	___eu784176.1__gi:209870700_ ;k__fungi;p__basidiomycota;c__agaricomycetes;o__agaricales;f__physalacriaceae;g__armillaria;s__armillaria tabescens;subclass agaricomycetidae;subkingdom__dikarya;superkingdom__eukaryota	98.3051	3.42323e-141	507.131	0	0	0	0	0	0	0	0	0	0	0	0	1	0	0	0	7	0	2	0	0	0	0	5	0	0	0	0	4	19	0	0	0	0	0	0	0	0	0	0	2	0	0	0	0
Zotu306	___eu232219.1__gi:166361546_ ;k__fungi;p__basidiomycota;c__agaricomycetes;o__polyporales;f__polyporaceae;g__ganoderma;s__ganoderma applanatum; superkingdom__bacteria;species__candidatus gloeomargarita;superkingdom__bacteria;strain__candidatus gloeomargarita;species__candidatus gloeomargarita;superkingdom__bacteria;species__candidatus gloeomargarita;subfamily__melolonthinae;superfamily__scarabaeoi…	92.7885	7.25749e-79	298.842	0	0	0	0	0	0	0	0	0	0	0	0	0	0	0	0	0	0	0	0	0	0	0	0	0	0	0	0	0	0	0	0	0	0	0	0	0	0	0	0	0	0	3	0	0
Zotu308	___jf907840.1__gi:344332799_ ;k__fungi;p__basidiomycota;c__agaricomycetes;o__agaricales;f__psathyrellaceae;g__coprinopsis;s__coprinopsis spilospora;subclass agaricomycetidae;subkingdom__dikarya;superkingdom__eukaryota	89.1975	4.82318e-114	416.061	0	0	0	0	0	0	0	0	0	0	0	0	0	0	0	0	0	0	0	0	0	0	0	11	0	0	0	0	0	0	0	0	0	0	0	0	0	0	0	0	0	0	0	0	0
Zotu309	___gu214649.1__gi:284159062_ ;k__fungi;p__ascomycota;c__dothideomycetes;o__capnodiales;f__capnodiaceae;g__polychaeton;s__polychaeton citri;subclass dothideomycetidae;subphylum__pezizomycotina;subkingdom__dikarya;superkingdom__eukaryota	95.2174	1.14641e-94	352.042	0	0	0	0	0	0	0	0	0	0	0	0	0	0	0	0	0	0	0	0	0	0	0	0	0	0	0	0	0	0	0	0	0	0	0	0	0	0	0	0	0	0	0	0	0
Zotu310	___ay952467.1__gi:63253673_ ;k__fungi;p__ascomycota;c__sordariomycetes;o__hypocreales;f__hypocreales;g__stilbella;s__stilbella fimetaria;superkingdom__eukaryota;subkingdom__dikarya;subphylum__pezizomycotina;subclass hypocreomycetidae	88.0658	5.20425e-74	283.514	0	0	0	0	0	0	0	0	0	0	0	0	0	0	0	0	0	0	0	0	0	0	0	0	0	0	0	0	0	0	0	0	0	0	0	0	0	0	0	0	0	0	0	0	0
Zotu311	mythimna separata ;k__metazoa;p__arthropoda;c__insecta;o__lepidoptera;f__noctuidae;g__mythimna;s__mythimna separata;subfamily__hadeninae;superfamily__noctuoidea;parvorder__heteroneura;infraorder__neolepidoptera;suborder__glossata;superorder__amphiesmenoptera;infraclass endopterygota;subclass neoptera;superclass hexapoda;superkingdom__eukaryota	95.6522	4.50027	38.2554	25	2	1	0	9	0	0	0	0	0	0	0	0	0	0	0	0	0	0	0	0	0	0	0	0	0	0	0	0	0	0	11	0	0	0	0	0	0	0	0	0	0	0	0	0
Zotu312	fuscoporia ferruginosa ;k__fungi;p__basidiomycota;c__agaricomycetes;o__hymenochaetales;f__hymenochaetaceae;g__fuscoporia;s__fuscoporia ferruginosa;subkingdom__dikarya;superkingdom__eukaryota	99.5816	2.26179e-117	427.783	0	0	0	0	0	0	0	0	0	0	0	0	0	0	0	0	0	0	0	13	0	0	0	0	0	0	0	0	0	0	0	0	0	0	0	0	0	0	0	0	0	0	0	0	0
Zotu313	___ay256709.1__gi:32450888_ ;k__fungi;p__basidiomycota;c__agaricomycetes;o__agaricales;f__omphalotaceae;g__gymnopus;s__gymnopus luxurians; subclass agaricomycetidae;subphylum__agaricomycotina;subkingdom__dikarya;superkingdom__eukaryota;	100	1.67929e-138	497.213	5	0	0	0	0	0	0	1	0	0	0	0	0	1	0	0	0	0	0	0	0	0	6	0	0	0	0	0	0	19	0	0	0	0	0	0	0	0	0	0	0	0	0	0	0
Zotu314	___dq192178.1__gi:76152283_ ;k__fungi;p__basidiomycota;c__agaricomycetes;o__agaricales;f__porotheleaceae;g__clitocybula;s__clitocybula oculus;superkingdom__eukaryota;subkingdom__dikarya;subphylum__agaricomycotina;subclass agaricomycetidae;	76.5579	2.81848e-47	194.247	0	0	0	0	0	0	0	0	0	0	0	0	0	21	0	0	0	0	0	0	0	0	0	0	0	0	0	0	0	0	0	0	0	0	0	0	0	0	0	0	0	0	0	0	0
Zotu315	___jf894110.1__gi:335893278_ ;k__fungi;p__basidiomycota;c__agaricomycetes;o__polyporales;f__polyporaceae;g__megasporoporia;s__megasporoporia setulosa; subphylum__agaricomycotina;subkingdom__dikarya;superkingdom__eukaryota;	100	1.13307e-114	417.864	0	0	0	0	0	0	0	0	0	0	0	0	2	2	5	0	0	0	0	0	0	0	0	0	0	0	0	0	0	0	0	0	0	5	0	0	0	0	0	0	0	0	0	0	0
Zotu316	___ab263119.1__gi:109452377_ ;k__fungi;p__basidiomycota;c__microbotryomycetes;o__sporidiobolales;f__sporidiobolaceae;g__rhodotorula;s__rhodotorula lamellibrachiae; subphylum__pucciniomycotina;subkingdom__dikarya;superkingdom__eukaryota;	95	2.17478e-17	95.9632	0	0	0	0	0	3	7	4	2	11	0	0	0	0	0	0	7	0	3	0	0	0	0	8	0	0	0	2	0	0	0	0	0	0	0	0	0	3	2	5	3	4	0	3	0
Zotu317	___ef433562.1__gi:149364861_ ;k__fungi;p__basidiomycota;c__agaricomycetes;o__hymenochaetales;f__hymenochaetaceae;g__fomitiporia;s__fomitiporia dryophila;subkingdom__dikarya;superkingdom__eukaryota	98.75	4.46964e-159	565.741	0	0	0	0	0	0	0	0	0	0	0	0	0	0	0	0	0	0	0	0	0	0	0	0	0	0	0	0	0	0	0	0	0	0	0	0	0	0	0	0	0	0	14	0	0
Zotu318	___af210819.1__gi:6563323_ ;k__fungi;p__basidiomycota;c__agaricomycetes;o__russulales;f__peniophoraceae;g__peniophora;s__peniophora aurantiaca;subkingdom__dikarya;superkingdom__eukaryota	91.2088	1.0193e-102	378.19	0	0	0	0	0	0	0	0	0	0	10	0	0	0	0	0	0	0	0	0	0	0	0	0	0	0	0	0	0	0	0	0	0	0	0	0	0	0	0	0	0	0	0	0	0
Zotu319	___jf908431.1__gi:344333388_ ;k__fungi;p__basidiomycota;c__agaricomycetes;o__agaricales;f__tricholomataceae;g__hemimycena;s__hemimycena ochrogaleata;subclass agaricomycetidae;subkingdom__dikarya;superkingdom__eukaryota	84	1.91582e-87	328.598	0	0	0	0	0	0	0	0	0	0	0	0	0	14	0	0	0	0	0	0	0	0	0	0	0	0	0	0	0	0	0	0	0	0	0	0	0	0	0	0	0	0	0	0	0
Zotu320	___af085492.1__gi:5880391_ ;k__fungi;p__basidiomycota;c__agaricomycetes;o__agaricales;f__amanitaceae;g__amanita;s__amanita tenuifolia;subclass agaricomycetidae;subkingdom__dikarya;superkingdom__eukaryota	98.8235	8.32486e-123	444.915	0	0	0	0	0	0	0	0	0	0	0	0	1	0	0	12	0	0	0	6	0	0	0	0	0	0	0	0	0	0	0	0	0	0	0	0	0	0	0	0	1	0	0	0	0
Zotu321	___ef429240.1__gi:149208237_ ;k__fungi;p__basidiomycota;c__agaricomycetes;o__hymenochaetales;f__hymenochaetaceae;g__phellinus;s__phellinus punctatus;subkingdom__dikarya;superkingdom__eukaryota	99.6875	3.01162e-161	573.856	0	0	0	0	0	0	0	0	0	0	0	0	0	0	0	0	0	0	0	0	0	0	0	0	0	0	0	0	0	31	0	0	0	0	0	0	0	0	0	0	0	0	0	0	0
Zotu322	___ay509551.1__gi:40846329_ ;k__fungi;p__basidiomycota;c__agaricomycetes;o__auriculariales;f__exidiaceae;g__ductifera;s__ductifera sucina;subkingdom__dikarya;superkingdom__eukaryota	78.5388	2.55077e-39	167.196	0	0	0	0	0	0	0	2	0	0	0	0	0	0	0	0	0	0	0	9	0	0	0	0	0	0	0	0	0	0	0	0	0	0	0	0	0	0	0	0	0	0	0	0	0
Zotu323	___z95495.1__gi:3287273_ ;k__fungi;p__ascomycota;c__sordariomycetes;o__hypocreales;f__hypocreaceae;g__hypocrea;s__hypocrea ceramica;subclass hypocreomycetidae;subphylum__pezizomycotina;subkingdom__dikarya;superkingdom__eukaryota	100	1.99456e-130	470.162	0	0	0	0	0	0	0	0	0	0	0	0	0	0	0	0	0	0	0	0	1	0	0	0	0	0	0	0	0	0	0	0	0	0	0	0	0	0	0	0	0	0	0	0	0
Zotu324	___eu400587.1__gi:171466633_ ;k__fungi;p__basidiomycota;c__malasseziomycetes;o__malasseziales;f__malasseziaceae;g__malassezia;s__malassezia restricta;subphylum__ustilaginomycotina;subkingdom__dikarya;superkingdom__eukaryota	100	1.70601e-144	517.05	0	0	0	0	0	0	0	0	0	0	2	0	0	0	0	0	0	0	0	0	2	0	0	0	4	0	0	0	0	0	0	2	0	6	0	0	0	0	0	0	0	0	0	0	5
Zotu325	___ay681195.1__gi:56411539_ ;k__fungi;p__ascomycota;c__sordariomycetes;o__sordariales;f__sordariaceae;g__sordaria;s__sordaria tomento_alba;subclass sordariomycetidae;subphylum__pezizomycotina;subkingdom__dikarya;superkingdom__eukaryota	99.2395	2.46171e-129	466.555	0	11	0	0	4	0	0	0	0	0	13	0	0	0	0	0	0	0	0	0	0	0	0	0	0	0	0	0	0	0	0	0	0	0	0	0	0	0	0	0	0	0	0	0	0
Zotu326	___hq650601.1__gi:336397014_ ;k__fungi;p__ascomycota;c__lecanoromycetes;o__ostropales;f__stictidaceae;g__stictis;s__stictis urceolatum;subclass ostropomycetidae;subphylum__pezizomycotina;subkingdom__dikarya;superkingdom__eukaryota	77.9951	1.33573e-78	298.842	0	0	0	0	0	0	0	0	0	0	0	26	0	0	0	0	0	0	0	0	0	0	0	0	0	0	0	0	0	0	0	0	0	0	0	0	0	0	0	0	0	0	0	0	0
Zotu327	___hq607954.1__gi:312434432_ ;k__fungi;p__basidiomycota;c__agaricomycetes;o__polyporales;f__meruliaceae;g__phlebia;s__phlebia subserialis; subphylum__agaricomycotina;subkingdom__dikarya;superkingdom__eukaryota;	84.5614	6.75874e-80	303.351	0	0	0	0	0	0	0	0	0	0	0	0	0	10	9	0	0	0	0	0	0	0	0	0	0	0	0	0	4	0	0	0	0	0	0	0	0	0	0	0	0	0	0	0	0
Zotu328	___gu214634.1__gi:284159047_ ;k__fungi;p__ascomycota;c__dothideomycetes;o__mycosphaerellales;f__teratosphaeriaceae;g__devriesia;s__devriesia lagerstroemiae; subclass dothideomycetidae;subphylum__pezizomycotina;subkingdom__dikarya;superkingdom__eukaryota;	99.5798	6.72489e-117	425.98	0	0	0	0	0	0	0	0	0	0	0	0	0	0	0	0	0	0	0	0	0	0	0	0	0	0	0	0	0	0	0	9	0	0	0	0	0	0	0	0	0	0	0	0	0
Zotu329	___dq337383.1__gi:85001732_ ;k__fungi;p__ascomycota;c__dothideomycetes;o__pleosporales;f__pleosporaceae;g__bipolaris;s__cochliobolus sativus;suborder__pleosporineae;subclass pleosporomycetidae;subphylum__pezizomycotina;subkingdom__dikarya;superkingdom__eukaryota	98.5185	2.53598e-129	466.555	0	0	0	0	0	0	0	0	0	0	0	0	0	0	0	0	0	0	0	0	0	0	19	0	0	0	0	0	0	0	0	0	0	0	0	0	0	0	0	0	0	0	0	0	0
Zotu330	___ay509555.1__gi:40846333_ ;k__fungi;p__basidiomycota;c__agaricomycetes;o__auriculariales;f__exidiaceae;g__exidia;s__exidia glandulosa;subkingdom__dikarya;superkingdom__eukaryota	91.7355	1.38855e-87	328.598	0	0	0	0	0	0	0	0	0	0	0	4	0	0	0	0	0	0	0	0	0	0	0	0	0	0	0	0	0	0	0	0	0	4	0	0	0	0	0	0	0	0	20	0	0
Zotu331	___ay124130.1__gi:22530833_ ;k__fungi;p__ascomycota;c__lecanoromycetes;o__peltigerales;f__nephromataceae;g__nephroma;s__nephroma bellum;suborder__peltigerineae;subclass lecanoromycetidae;subphylum__pezizomycotina;subkingdom__dikarya;superkingdom__eukaryota	98.1481	1.01961e-16	94.1598	0	0	0	0	0	0	0	0	0	0	0	0	0	0	0	0	0	0	0	18	0	0	0	0	0	0	0	0	0	0	0	0	0	0	0	0	0	0	0	0	0	0	0	0	0
Zotu332	___ab263119.1__gi:109452377_ ;k__fungi;p__basidiomycota;c__microbotryomycetes;o__sporidiobolales;f__sporidiobolaceae;g__rhodotorula;s__rhodotorula lamellibrachiae; subphylum__pucciniomycotina;subkingdom__dikarya;superkingdom__eukaryota;	95	2.31833e-17	95.9632	0	0	0	0	0	4	4	4	6	0	0	0	0	0	0	0	2	0	9	0	0	0	0	4	0	0	0	4	0	0	0	0	0	0	0	0	0	1	1	1	5	1	0	5	0
[truncated: 15 more columns]

## Sheet: B. Annotated data
otu name	Taxonomy	A020.O [Ae tae]	A021.1.O [Ae tae]	A021.2.O [Ae tae]	A021.3.O [Ae tae]	A022.O [Ae tae]	B011.O [Ae tae]	B179.O [Ae tae]	B299.O [Ae tae]	B332.O [Ae tae]	B424.O [Ae tae]	C007.1.M [Ae tae]	C007.2.M [Ae tae]	C007.3.M [Ae tae]	D025.1.M [Ae tae]	D025.2.M [Ae tae]	D025.3.M [Ae tae]	D025.4.M [Ae tae]	A024.1.O [An atr]	A024.2.O [An atr]	A024.3.O [An atr]	A025.1.O [An atr]	A025.2.O [An atr]	B030.O [An atr]	B131.O [An atr]	B302.O [An atr]	B343.O [An atr]	B373.O [An atr]	C015.M [An atr]	C016.M [An atr]	C017.M [An atr]	C018.M [An atr]	C019.M [An atr]	D017.M [An atr]	D020.M [An atr]	D023.M [An atr]	D048.M [An atr]	D050.M [An atr]	A028.O [Cx nig]	A032.O [Cx nig]	A034.O [Cx nig]	A045.O [Cx nig]	A046.O [Cx nig]	B098.O [Cx nig]	B165.O [Cx nig]	B224.O [Cx nig]	B320.O [Cx nig]	B399.O [Cx nig]	C008.M [Cx nig]
Zotu1	___ab263119.1__gi:109452377_ ;k__fungi;p__basidiomycota;c__microbotryomycetes;o__sporidiobolales;f__sporidiobolaceae;g__rhodotorula;s__rhodotorula lamellibrachiae; subphylum__pucciniomycotina;subkingdom__dikarya;superkingdom__eukaryota;	95	2.17478e-17	95.0615			571	475	455	421	480	379	478	380	411	270	368	417	542	354	290	381	390	74762	72989	78958	68301	80124	70033	57156	72576	189	67068	78749	54518	71104	30006	74221	67480	42555	56320	54041	55564	411	393	482	392	493	362
Zotu2	___ab263119.1__gi:109452377_ ;k__fungi;p__basidiomycota;c__microbotryomycetes;o__sporidiobolales;f__sporidiobolaceae;g__rhodotorula;s__rhodotorula lamellibrachiae; subphylum__pucciniomycotina;subkingdom__dikarya;superkingdom__eukaryota;	95	2.17478e-17	95.0615			22	19	16	17	23	19	26	21	15	9	23	26	35	17	16	18	17	340	549	886	115	509	5271	203	141	9	211	951	2001	208	48124	495	108	543	634	44	5144	19	17	20	21	27	12
Zotu3	___ab263119.1__gi:109452377_ ;k__fungi;p__basidiomycota;c__microbotryomycetes;o__sporidiobolales;f__sporidiobolaceae;g__rhodotorula;s__rhodotorula lamellibrachiae; subphylum__pucciniomycotina;subkingdom__dikarya;superkingdom__eukaryota;	90.1408	6.53932e-18	96.8649			14	9	9	9	8	6	13	10	11	11	13	14	12	17	3	13	11	22	2093	567	580	634	27	719	10	3	2187	22	18739	164	19	6373	1179	905	102	1740	283	23	6	14	14	18	6
Zotu4	culex pilosus ;k__metazoa;p__arthropoda;c__insecta;o__diptera;f__culicidae;g__culex;s__culex pilosus;subgenus mochlostyrax;tribe__culicini;subfamily__culicinae;superfamily__culicoidea;infraorder__culicomorpha;suborder__nematocera;infraclass endopterygota;subclass neoptera;superclass hexapoda;superkingdom__eukaryota	93.1507	6.38755e-20	104.078			25601	33134	23496	37061	30248	18611	19151	4036	24084	15391	27625	28419	10478	21621	5707	27821	26466	114	131	154	116	121	150	120	135	65	117	126	129	118	122	115	127	42	83	92	97	138	156	160	116	176	125
Zotu5	culex pilosus ;k__metazoa;p__arthropoda;c__insecta;o__diptera;f__culicidae;g__culex;s__culex pilosus;subgenus mochlostyrax;tribe__culicini;subfamily__culicinae;superfamily__culicoidea;infraorder__culicomorpha;suborder__nematocera;infraclass endopterygota;subclass neoptera;superclass hexapoda;superkingdom__eukaryota	93.1507	6.4014e-20	104.078			21313	11915	22917	1585	12500	4824	2280	27827	11116	18556	6690	4899	37965	14445	20493	15228	6833	62	86	69	57	83	100	78	68	38	69	71	97	89	75	70	53	34	58	60	67	100	94	103	72	126	94
Zotu6	___ab263119.1__gi:109452377_ ;k__fungi;p__basidiomycota;c__microbotryomycetes;o__sporidiobolales;f__sporidiobolaceae;g__rhodotorula;s__rhodotorula lamellibrachiae; subphylum__pucciniomycotina;subkingdom__dikarya;superkingdom__eukaryota;	95	2.17478e-17	95.0615			5	5	4	6	3	5	8	4	3	3	5	1	3	3	6	9	3	74	145	81	47	2351	65	10952	72	4	60	290	125	55	150	62	307	821	62	31	55	3	3	7	4	11	4
Zotu7	___ab263119.1__gi:109452377_ ;k__fungi;p__basidiomycota;c__microbotryomycetes;o__sporidiobolales;f__sporidiobolaceae;g__rhodotorula;s__rhodotorula lamellibrachiae; subphylum__pucciniomycotina;subkingdom__dikarya;superkingdom__eukaryota;	95	2.34704e-17	95.0615			3	3	5	5	11	4	6	8	5	4	5	7	15	7	1	4	3	29	2444	474	554	543	38	464	28	3	1315	47	5750	99	39	2533	529	180	55	973	177	7	9	6	5	9	2
Zotu8	culex pilosus ;k__metazoa;p__arthropoda;c__insecta;o__diptera;f__culicidae;g__culex;s__culex pilosus;subgenus mochlostyrax;tribe__culicini;subfamily__culicinae;superfamily__culicoidea;infraorder__culicomorpha;suborder__nematocera;infraclass endopterygota;subclass neoptera;superclass hexapoda;superkingdom__eukaryota	93.1507	6.4014e-20	104.078			8498	226	1626	1755	54	44	2296	74	60	181	44	5364	123	68	1455	3261	44	6	10	6	7	15	9	10	12	6	8	9	16	7	7	3	7	3	9	8	5	7	5	9	9	8	8
Zotu9	thinophilus nitens ;k__metazoa;p__arthropoda;c__insecta;o__diptera;f__dolichopodidae;g__thinophilus;s__thinophilus nitens;subfamily__hydrophorinae;superfamily__empidoidea;infraorder__muscomorpha;suborder__brachycera;infraclass endopterygota;subclass neoptera;superclass hexapoda;superkingdom__eukaryota	92.8571	1.7474	39.157			21	25	24	106	321	11	9	5125	12	7	9	144	3	58	7	98	30	1	1	2	0	0	0	0	0	0	0	1	0	0	2	0	1	0	1	1	0	0	0	0	1	0	1
Zotu10	thinophilus nitens ;k__metazoa;p__arthropoda;c__insecta;o__diptera;f__dolichopodidae;g__thinophilus;s__thinophilus nitens;subfamily__hydrophorinae;superfamily__empidoidea;infraorder__muscomorpha;suborder__brachycera;infraclass endopterygota;subclass neoptera;superclass hexapoda;superkingdom__eukaryota	92.8571	1.7474	39.157			2	16	29	1	1	0	0	5264	0	0	2	0	1	2	1	0	1	0	1	1	0	0	1	3	1	0	0	1	2	1	0	0	0	0	1	0	1	0	0	1	0	0	0
Zotu11	culex pilosus ;k__metazoa;p__arthropoda;c__insecta;o__diptera;f__culicidae;g__culex;s__culex pilosus;subgenus mochlostyrax;tribe__culicini;subfamily__culicinae;superfamily__culicoidea;infraorder__culicomorpha;suborder__nematocera;infraclass endopterygota;subclass neoptera;superclass hexapoda;superkingdom__eukaryota	93.1507	6.38755e-20	104.078			69	58	51	48	59	42	17381	22	45	30	45	42	42	38	28	54	51	4	9	6	3	12	4	5	3	3	6	8	10	2	3	9	7	3	5	6	6	10	4	10	8	6	5
Zotu12	culex nigripalpus ;k__metazoa;p__arthropoda;c__insecta;o__diptera;f__culicidae;g__culex;s__culex nigripalpus;subgenus culex;tribe__culicini;subfamily__culicinae;superfamily__culicoidea;infraorder__culicomorpha;suborder__nematocera;infraclass endopterygota;subclass neoptera;superclass hexapoda;superkingdom__eukaryota	95.5426	0	827.229			14	10	4	3	6	6	6	2	12	4	8	10	8	3	1	8	7	6	6	12	7	5	7	3	9	3	8	6	6	4	4	12	8	1	1	14	7	231	42	64	390	392	18
Zotu13	culex nigripalpus ;k__metazoa;p__arthropoda;c__insecta;o__diptera;f__culicidae;g__culex;s__culex nigripalpus;subgenus culex;tribe__culicini;subfamily__culicinae;superfamily__culicoidea;infraorder__culicomorpha;suborder__nematocera;infraclass endopterygota;subclass neoptera;superclass hexapoda;superkingdom__eukaryota	95.7364	0	834.443			5	1	8	7	4	4	5	5	6	4	4	8	4	9	7	6	4	5	3	6	5	2	1	4	1	4	3	6	5	5	2	5	3	5	1	4	3	22	196	13052	27	27	69
Zotu14	culex nigripalpus ;k__metazoa;p__arthropoda;c__insecta;o__diptera;f__culicidae;g__culex;s__culex nigripalpus;subgenus culex;tribe__culicini;subfamily__culicinae;superfamily__culicoidea;infraorder__culicomorpha;suborder__nematocera;infraclass endopterygota;subclass neoptera;superclass hexapoda;superkingdom__eukaryota	94.8077	0	818.212			10	10	10	4	15	7	11	5	11	3	3	2	9	4	5	5	11	4	8	7	9	6	5	8	7	4	5	3	7	6	10	0	4	2	6	8	5	15	40	934	87	18	73
Zotu15	culex nigripalpus ;k__metazoa;p__arthropoda;c__insecta;o__diptera;f__culicidae;g__culex;s__culex nigripalpus;subgenus culex;tribe__culicini;subfamily__culicinae;superfamily__culicoidea;infraorder__culicomorpha;suborder__nematocera;infraclass endopterygota;subclass neoptera;superclass hexapoda;superkingdom__eukaryota	94.5946	0	805.589			7	8	9	5	9	10	9	7	9	4	4	7	6	10	3	13	5	3	2	5	4	3	6	7	5	5	6	5	6	4	4	6	8	1	1	6	1	21	22	35	13	26	20
Zotu16	culex pilosus ;k__metazoa;p__arthropoda;c__insecta;o__diptera;f__culicidae;g__culex;s__culex pilosus;subgenus mochlostyrax;tribe__culicini;subfamily__culicinae;superfamily__culicoidea;infraorder__culicomorpha;suborder__nematocera;infraclass endopterygota;subclass neoptera;superclass hexapoda;superkingdom__eukaryota	93.1507	6.42911e-20	104.078			24	3200	32	22	27	18	30	20	32	196	26	93	4326	17	12	13	9416	4	2	5	7	8	4	9	7	3	9	5	1	2	4	2	5	3	1	6	7	7	9	8	7	10	6
Zotu17	culex nigripalpus ;k__metazoa;p__arthropoda;c__insecta;o__diptera;f__culicidae;g__culex;s__culex nigripalpus;subgenus culex;tribe__culicini;subfamily__culicinae;superfamily__culicoidea;infraorder__culicomorpha;suborder__nematocera;infraclass endopterygota;subclass neoptera;superclass hexapoda;superkingdom__eukaryota	95.7282	0	834.443			6	12	8	11	10	2	9	5	9	6	9	5	12	6	3	8	9	9	8	6	8	6	4	4	7	2	3	8	6	13	7	5	2	3	4	7	5	278	3235	387	188	394	8483
Zotu18	culex nigripalpus ;k__metazoa;p__arthropoda;c__insecta;o__diptera;f__culicidae;g__culex;s__culex nigripalpus;subgenus culex;tribe__culicini;subfamily__culicinae;superfamily__culicoidea;infraorder__culicomorpha;suborder__nematocera;infraclass endopterygota;subclass neoptera;superclass hexapoda;superkingdom__eukaryota	96.1315	0	848.87			5	6	7	4	7	4	4	4	3	4	6	9	6	4	4	3	3	2	6	4	2	2	4	3	4	3	6	4	4	3	3	7	4	2	5	5	2	17	99	21	13648	30	58
Zotu19	culex nigripalpus ;k__metazoa;p__arthropoda;c__insecta;o__diptera;f__culicidae;g__culex;s__culex nigripalpus;subgenus culex;tribe__culicini;subfamily__culicinae;superfamily__culicoidea;infraorder__culicomorpha;suborder__nematocera;infraclass endopterygota;subclass neoptera;superclass hexapoda;superkingdom__eukaryota	93.9922	0	787.555			10	13	9	4	7	3	5	3	6	6	4	11	6	3	3	3	3	7	4	6	5	5	4	2	5	3	6	4	5	1	7	3	3	1	2	4	5	19	71	78	50	13	70
Zotu20	culex pilosus ;k__metazoa;p__arthropoda;c__insecta;o__diptera;f__culicidae;g__culex;s__culex pilosus;subgenus mochlostyrax;tribe__culicini;subfamily__culicinae;superfamily__culicoidea;infraorder__culicomorpha;suborder__nematocera;infraclass endopterygota;subclass neoptera;superclass hexapoda;superkingdom__eukaryota	93.1507	6.44297e-20	104.078			962	39	21	21	21	9571	11	14	42	17	37	17	24	22	17	24	16	4	5	7	5	3	1	3	6	4	3	0	4	4	6	0	2	1	2	3	2	3	4	6	0	8	2
Zotu21	culex nigripalpus ;k__metazoa;p__arthropoda;c__insecta;o__diptera;f__culicidae;g__culex;s__culex nigripalpus;subgenus culex;tribe__culicini;subfamily__culicinae;superfamily__culicoidea;infraorder__culicomorpha;suborder__nematocera;infraclass endopterygota;subclass neoptera;superclass hexapoda;superkingdom__eukaryota	97.8682	0	874.117			10	16	11	7	13	10	13	9	18	6	8	12	14	6	8	21	13	7	8	7	13	11	9	12	8	4	6	10	10	5	5	12	10	6	4	11	11	249	451	559	2807	244	654
Zotu22	culex nigripalpus ;k__metazoa;p__arthropoda;c__insecta;o__diptera;f__culicidae;g__culex;s__culex nigripalpus;subgenus culex;tribe__culicini;subfamily__culicinae;superfamily__culicoidea;infraorder__culicomorpha;suborder__nematocera;infraclass endopterygota;subclass neoptera;superclass hexapoda;superkingdom__eukaryota	95.5684	0	838.049			3	3	1	5	2	5	5	1	4	2	4	5	6	4	3	4	5	6	3	2	2	1	5	1	3	2	4	2	3	3	3	4	5	2	1	2	1	878	56	35	298	549	442
Zotu23	culex nigripalpus ;k__metazoa;p__arthropoda;c__insecta;o__diptera;f__culicidae;g__culex;s__culex nigripalpus;subgenus culex;tribe__culicini;subfamily__culicinae;superfamily__culicoidea;infraorder__culicomorpha;suborder__nematocera;infraclass endopterygota;subclass neoptera;superclass hexapoda;superkingdom__eukaryota	95.0096	0	830.836			10	4	12	7	4	4	7	2	6	6	6	4	3	6	4	6	7	5	4	2	3	1	0	3	5	3	2	8	6	4	6	5	4	1	2	5	4	264	82	153	36	15610	37
Zotu24	culex nigripalpus ;k__metazoa;p__arthropoda;c__insecta;o__diptera;f__culicidae;g__culex;s__culex nigripalpus;subgenus culex;tribe__culicini;subfamily__culicinae;superfamily__culicoidea;infraorder__culicomorpha;suborder__nematocera;infraclass endopterygota;subclass neoptera;superclass hexapoda;superkingdom__eukaryota	95.7611	0	841.656			2	4	1	4	2	1	3	2	6	1	2	4	4	3	0	3	3	0	7	7	5	0	5	3	1	1	3	3	0	1	2	2	0	0	2	2	1	174	75	160	51	6154	645
Zotu25	thinophilus nitens ;k__metazoa;p__arthropoda;c__insecta;o__diptera;f__dolichopodidae;g__thinophilus;s__thinophilus nitens;subfamily__hydrophorinae;superfamily__empidoidea;infraorder__muscomorpha;suborder__brachycera;infraclass endopterygota;subclass neoptera;superclass hexapoda;superkingdom__eukaryota	92.8571	1.7474	39.157			1	0	1	3	14	0	0	9	9	0	1151	0	0	0	0	2	0	0	0	0	0	0	1	0	0	0	1	0	0	0	0	0	0	0	0	0	0	0	0	0	0	1	0
Zotu26	culex nigripalpus ;k__metazoa;p__arthropoda;c__insecta;o__diptera;f__culicidae;g__culex;s__culex nigripalpus;subgenus culex;tribe__culicini;subfamily__culicinae;superfamily__culicoidea;infraorder__culicomorpha;suborder__nematocera;infraclass endopterygota;subclass neoptera;superclass hexapoda;superkingdom__eukaryota	96.5116	0	854.28			4	2	5	5	1	1	3	1	6	1	7	4	5	4	0	4	4	1	4	2	1	1	2	1	1	0	2	5	2	0	1	3	4	0	1	1	2	19	33	417	319	65	102
Zotu27	___ef405864.1__gi:125661831_ ;k__fungi;p__ascomycota;c__dothideomycetes;o__cladosporiales;f__cladosporiaceae;g__cladosporium;s__cladosporium cladosporioides; subclass hypocreomycetidae;subphylum__pezizomycotina;subkingdom__dikarya;superkingdom__eukaryota;species__gondwanamyces;subclass hypocreomycetidae;subphylum__pezizomycotina;subkingdom__dikarya;superkingdom__eukaryota;species__gondwanamyces;s…	100	3.34895e-114	416.061			0	0	0	0	2	2	1	0	2	0	285	153	92	20	1	52	54	0	0	0	0	0	0	1	0	0	0	22	0	2	2	0	4	21	0	0	2	0	1	1	0	1	0
Zotu28	thinophilus nitens ;k__metazoa;p__arthropoda;c__insecta;o__diptera;f__dolichopodidae;g__thinophilus;s__thinophilus nitens;subfamily__hydrophorinae;superfamily__empidoidea;infraorder__muscomorpha;suborder__brachycera;infraclass endopterygota;subclass neoptera;superclass hexapoda;superkingdom__eukaryota	92.8571	1.7474	39.157			0	0	1	0	3	0	0	20	1	0	1058	0	0	0	0	1	0	1	0	0	0	0	0	1	0	0	0	0	0	0	0	0	0	0	0	0	0	0	0	1	0	1	0
Zotu29	___fn298654.1__gi:227284155_ ;k__fungi;p__basidiomycota;c__tremellomycetes;o__tremellales;f__cryptococcaceae;g__cryptococcus;s__cryptococcus wieringae; subphylum__agaricomycotina;subkingdom__dikarya;superkingdom__eukaryota;	89.7959	2.13647e-65	253.758			0	1	609	0	0	1	1	0	0	0	0	1	0	0	0	0	0	0	0	0	1	0	0	0	1	0	0	0	0	1	0	0	0	0	0	1	0	0	0	0	0	0	0
Zotu30	culex nigripalpus ;k__metazoa;p__arthropoda;c__insecta;o__diptera;f__culicidae;g__culex;s__culex nigripalpus;subgenus culex;tribe__culicini;subfamily__culicinae;superfamily__culicoidea;infraorder__culicomorpha;suborder__nematocera;infraclass endopterygota;subclass neoptera;superclass hexapoda;superkingdom__eukaryota	98.6408	0	893.954			13	12	5	7	11	9	15	5	8	8	3	7	12	5	6	14	9	7	5	12	9	9	7	9	4	2	7	5	4	8	10	6	4	1	8	2	3	498	804	57	41	137	907
Zotu31	culex nigripalpus ;k__metazoa;p__arthropoda;c__insecta;o__diptera;f__culicidae;g__culex;s__culex nigripalpus;subgenus culex;tribe__culicini;subfamily__culicinae;superfamily__culicoidea;infraorder__culicomorpha;suborder__nematocera;infraclass endopterygota;subclass neoptera;superclass hexapoda;superkingdom__eukaryota	96.3107	0	852.476			3	3	2	0	0	4	3	4	3	2	4	3	1	1	1	8	2	3	0	0	1	4	4	3	4	2	1	5	1	1	4	3	3	1	5	1	5	94	523	25	220	55	48
Zotu32	___dq826553.1__gi:112363302_ ;k__fungi;p__basidiomycota;c__agaricomycetes;o__hymenochaetales;f__hymenochaetales;g__resinicium;s__resinicium monticola;superkingdom__eukaryota;subkingdom__dikarya	89.5833	4.5392e-81	306.957			0	0	0	0	0	0	0	0	0	0	0	0	1	0	0	0	1	0	0	1	0	0	0	0	1	626	0	0	0	1	0	0	2	0	0	0	0	0	0	1	1	1	0
Zotu33	culex pilosus ;k__metazoa;p__arthropoda;c__insecta;o__diptera;f__culicidae;g__culex;s__culex pilosus;subgenus mochlostyrax;tribe__culicini;subfamily__culicinae;superfamily__culicoidea;infraorder__culicomorpha;suborder__nematocera;infraclass endopterygota;subclass neoptera;superclass hexapoda;superkingdom__eukaryota	93.1507	6.45683e-20	104.078			149	16	9	7	23	4512	9	17	26	7	13	19	17	13	13	10	17	0	0	1	2	1	1	2	2	1	1	1	0	1	3	1	0	0	0	0	1	0	2	2	1	6	2
Zotu34	culex nigripalpus ;k__metazoa;p__arthropoda;c__insecta;o__diptera;f__culicidae;g__culex;s__culex nigripalpus;subgenus culex;tribe__culicini;subfamily__culicinae;superfamily__culicoidea;infraorder__culicomorpha;suborder__nematocera;infraclass endopterygota;subclass neoptera;superclass hexapoda;superkingdom__eukaryota	94.2197	0	811.901			3	0	0	1	3	2	2	0	6	1	2	0	1	0	1	0	2	1	0	0	0	0	1	0	1	0	1	1	2	0	0	2	1	1	2	1	0	4551	21	105	12	6	3
Zotu35	culex nigripalpus ;k__metazoa;p__arthropoda;c__insecta;o__diptera;f__culicidae;g__culex;s__culex nigripalpus;subgenus culex;tribe__culicini;subfamily__culicinae;superfamily__culicoidea;infraorder__culicomorpha;suborder__nematocera;infraclass endopterygota;subclass neoptera;superclass hexapoda;superkingdom__eukaryota	96.1464	0	854.28			7	3	1	2	1	2	4	2	4	2	1	3	4	1	1	1	5	1	4	5	3	4	2	4	0	1	1	2	4	1	2	4	0	2	3	2	4	7135	101	32	97	175	48
Zotu36	culex nigripalpus ;k__metazoa;p__arthropoda;c__insecta;o__diptera;f__culicidae;g__culex;s__culex nigripalpus;subgenus culex;tribe__culicini;subfamily__culicinae;superfamily__culicoidea;infraorder__culicomorpha;suborder__nematocera;infraclass endopterygota;subclass neoptera;superclass hexapoda;superkingdom__eukaryota	94.971	0	812.802			1	2	4	0	1	0	2	1	2	3	0	2	4	2	1	3	4	0	4	0	1	0	0	2	1	0	1	1	0	2	2	1	0	1	1	1	1	19	5	10	29	11	8
Zotu37	culex nigripalpus ;k__metazoa;p__arthropoda;c__insecta;o__diptera;f__culicidae;g__culex;s__culex nigripalpus;subgenus culex;tribe__culicini;subfamily__culicinae;superfamily__culicoidea;infraorder__culicomorpha;suborder__nematocera;infraclass endopterygota;subclass neoptera;superclass hexapoda;superkingdom__eukaryota	95.0287	0	833.541			5	4	2	8	5	10	2	3	3	2	1	2	5	3	2	8	2	1	3	4	0	2	3	2	6	0	5	3	3	1	2	2	4	2	2	2	3	9843	199	109	138	1348	46
Zotu38	No hits found						9	1	0	0	1	0	0	0	2	0	4	0	0	1	1	0	619	0	0	0	0	0	0	1	0	0	0	0	0	0	0	0	0	0	0	0	0	0	1	0	0	0	1
Zotu39	culex nigripalpus ;k__metazoa;p__arthropoda;c__insecta;o__diptera;f__culicidae;g__culex;s__culex nigripalpus;subgenus culex;tribe__culicini;subfamily__culicinae;superfamily__culicoidea;infraorder__culicomorpha;suborder__nematocera;infraclass endopterygota;subclass neoptera;superclass hexapoda;superkingdom__eukaryota	97.2868	0	858.788			8	4	5	4	5	6	2	2	2	2	3	4	4	0	2	4	2	5	4	1	3	1	0	4	3	3	2	3	5	2	3	2	3	3	6	2	1	9	103	77	11	9	13
Zotu40	culex nigripalpus ;k__metazoa;p__arthropoda;c__insecta;o__diptera;f__culicidae;g__culex;s__culex nigripalpus;subgenus culex;tribe__culicini;subfamily__culicinae;superfamily__culicoidea;infraorder__culicomorpha;suborder__nematocera;infraclass endopterygota;subclass neoptera;superclass hexapoda;superkingdom__eukaryota	95.3398	0	829.033			1	0	0	3	2	0	1	1	0	0	0	0	2	1	1	0	1	0	1	1	2	2	0	0	1	0	0	1	2	0	0	1	1	0	1	1	1	13	36	2005	53	27	10
Zotu41	___ay341338.1__gi:33356633_ ;k__fungi;p__ascomycota;c__taphrinomycetes;o__taphrinales;f__taphrinaceae;g__taphrina;s__taphrina kruchii;subphylum__taphrinomycotina;subkingdom__dikarya;superkingdom__eukaryota	86.4662	1.79099e-80	305.154			0	0	0	0	0	0	0	0	0	0	5	14	0	0	5	16	0	0	1	0	0	0	0	0	0	0	0	0	1	0	0	1	0	1	0	0	0	0	0	1	0	0	0
Zotu42	culex nigripalpus ;k__metazoa;p__arthropoda;c__insecta;o__diptera;f__culicidae;g__culex;s__culex nigripalpus;subgenus culex;tribe__culicini;subfamily__culicinae;superfamily__culicoidea;infraorder__culicomorpha;suborder__nematocera;infraclass endopterygota;subclass neoptera;superclass hexapoda;superkingdom__eukaryota	95.534	0	829.934			4	1	3	2	4	2	0	0	1	1	1	1	3	2	0	3	1	2	2	3	4	2	1	4	0	0	3	0	0	4	5	5	0	1	3	0	1	2642	394	43	348	100	85
Zotu43	culex nigripalpus ;k__metazoa;p__arthropoda;c__insecta;o__diptera;f__culicidae;g__culex;s__culex nigripalpus;subgenus culex;tribe__culicini;subfamily__culicinae;superfamily__culicoidea;infraorder__culicomorpha;suborder__nematocera;infraclass endopterygota;subclass neoptera;superclass hexapoda;superkingdom__eukaryota	94.9904	0	825.426			0	1	2	2	1	0	2	0	4	0	1	0	1	2	1	2	3	2	1	1	2	0	1	4	1	2	0	2	3	2	0	1	2	0	0	1	1	68	148	25	7	25	257
Zotu44	___aj300334.1__gi:13539171_ ;k__fungi;p__ascomycota;c__dothideomycetes;o__cladosporiales;f__cladosporiaceae;g__cladosporium;s__cladosporium cladosporioides; subclass hypocreomycetidae;subphylum__pezizomycotina;subkingdom__dikarya;superkingdom__eukaryota;species__gondwanamyces;subclass hypocreomycetidae;subphylum__pezizomycotina;subkingdom__dikarya;superkingdom__eukaryota;species__gondwanamyces;su…	100	9.64311e-115	417.864			0	1	0	0	1	6	8	0	10	0	16	40	9	21	1	43	22	1	1	0	0	0	0	0	0	0	0	25	1	1	1	15	4	8	0	1	2	23	25	2	10	0	5
Zotu45	culex nigripalpus ;k__metazoa;p__arthropoda;c__insecta;o__diptera;f__culicidae;g__culex;s__culex nigripalpus;subgenus culex;tribe__culicini;subfamily__culicinae;superfamily__culicoidea;infraorder__culicomorpha;suborder__nematocera;infraclass endopterygota;subclass neoptera;superclass hexapoda;superkingdom__eukaryota	94.5946	0	806.49			4	2	3	2	6	3	2	1	6	2	4	2	4	0	0	1	1	2	6	2	2	2	2	0	0	0	4	1	2	0	3	0	1	0	3	6	2	51	53	67	16	15	55
Zotu46	culex nigripalpus ;k__metazoa;p__arthropoda;c__insecta;o__diptera;f__culicidae;g__culex;s__culex nigripalpus;subgenus culex;tribe__culicini;subfamily__culicinae;superfamily__culicoidea;infraorder__culicomorpha;suborder__nematocera;infraclass endopterygota;subclass neoptera;superclass hexapoda;superkingdom__eukaryota	97.6744	0	866.903			2	6	0	2	1	4	2	3	3	3	2	3	3	1	1	3	3	1	3	4	1	3	3	8	1	0	1	3	2	3	1	2	4	0	2	4	1	5	7153	209	64	13	9
Zotu47	culex nigripalpus ;k__metazoa;p__arthropoda;c__insecta;o__diptera;f__culicidae;g__culex;s__culex nigripalpus;subgenus culex;tribe__culicini;subfamily__culicinae;superfamily__culicoidea;infraorder__culicomorpha;suborder__nematocera;infraclass endopterygota;subclass neoptera;superclass hexapoda;superkingdom__eukaryota	99.2263	0	909.282			16	4	14	10	6	11	10	6	11	1	9	14	13	10	9	6	17	8	8	13	5	9	11	9	6	6	12	6	6	6	9	10	6	2	5	5	8	93	78	80	444	184	1099
Zotu48	culex nigripalpus ;k__metazoa;p__arthropoda;c__insecta;o__diptera;f__culicidae;g__culex;s__culex nigripalpus;subgenus culex;tribe__culicini;subfamily__culicinae;superfamily__culicoidea;infraorder__culicomorpha;suborder__nematocera;infraclass endopterygota;subclass neoptera;superclass hexapoda;superkingdom__eukaryota	95.3668	0	827.229			7	4	7	1	5	0	4	1	4	4	2	0	7	6	1	4	3	5	0	1	5	5	2	1	0	3	2	1	2	1	2	1	2	1	2	1	1	23	53	181	49	15	19
Zotu49	culex nigripalpus ;k__metazoa;p__arthropoda;c__insecta;o__diptera;f__culicidae;g__culex;s__culex nigripalpus;subgenus culex;tribe__culicini;subfamily__culicinae;superfamily__culicoidea;infraorder__culicomorpha;suborder__nematocera;infraclass endopterygota;subclass neoptera;superclass hexapoda;superkingdom__eukaryota	95.1644	0	821.819			4	6	3	3	5	3	3	6	3	1	3	5	3	5	3	1	1	2	3	1	0	1	0	3	1	0	2	1	3	1	2	2	0	1	0	5	1	274	40	146	14	157	404
Zotu50	___ay046207.1__gi:31746865_ ;k__fungi;p__ascomycota;c__saccharomycetes;o__saccharomycetales;f__saccharomycetaceae;g__lachancea;s__lachancea thermotolerans;subphylum__saccharomycotina;subkingdom__dikarya;superkingdom__eukaryota	99.2032	9.22671e-123	444.915			1	0	0	0	0	0	0	0	0	0	0	0	0	344	0	0	0	0	1	0	0	0	0	0	2	0	0	2	0	0	1	2	0	8	1	1	0	0	0	1	0	0	0
Zotu51	picea glauca ;k__viridiplantae;p__streptophyta;c__pinopsida;o__pinales;f__pinaceae;g__picea;s__picea glauca; subclass pinidae;subphylum__streptophytina;superkingdom__eukaryota;	92	3.50209	37.3537			0	0	0	0	0	0	0	0	0	0	0	0	0	0	0	0	0	0	0	0	0	0	0	0	1	0	0	0	0	0	0	0	0	0	0	0	0	0	0	28	0	62	81
Zotu52	___aj437693.1__gi:28865716_ ;k__fungi;p__basidiomycota;c__malasseziomycetes;o__malasseziales;f__malasseziaceae;g__malassezia;s__malassezia globosa;subphylum__ustilaginomycotina;subkingdom__dikarya;superkingdom__eukaryota	96.3636	2.17565e-150	536.887			0	0	3	0	1	0	1	0	0	0	0	0	1	0	1	1	1	0	0	0	0	0	0	1	0	0	0	1	0	0	0	0	0	0	0	0	0	6	0	0	3	1	0
Zotu53	No hits found						0	0	0	0	0	0	0	0	316	0	0	0	0	0	0	0	1	0	0	0	0	0	0	0	0	0	0	0	0	0	0	0	0	0	0	0	0	0	0	0	0	0	0
Zotu54	___eu030147.1__gi:154431721_ ;k__fungi;p__basidiomycota;c__agaricomycetes;o__polyporales;f__polyporaceae;g__coriolopsis;s__coriolopsis caperata; subphylum__agaricomycotina;subkingdom__dikarya;superkingdom__eukaryota;	99.5169	5.58684e-100	370.075			40	0	4	0	12	0	0	0	40	5	0	0	0	0	0	0	0	1	0	0	5	0	1	0	11	0	1	1	0	0	0	0	0	0	0	0	0	0	16	75	0	31	9
Zotu55	culex nigripalpus ;k__metazoa;p__arthropoda;c__insecta;o__diptera;f__culicidae;g__culex;s__culex nigripalpus;subgenus culex;tribe__culicini;subfamily__culicinae;superfamily__culicoidea;infraorder__culicomorpha;suborder__nematocera;infraclass endopterygota;subclass neoptera;superclass hexapoda;superkingdom__eukaryota	95.3846	0	834.443			1	1	2	1	2	1	4	0	3	0	1	2	0	3	1	3	0	2	3	2	1	3	2	0	2	0	0	0	0	0	0	1	0	0	1	0	1	25	8	94	14	9	28
Zotu56	culex nigripalpus ;k__metazoa;p__arthropoda;c__insecta;o__diptera;f__culicidae;g__culex;s__culex nigripalpus;subgenus culex;tribe__culicini;subfamily__culicinae;superfamily__culicoidea;infraorder__culicomorpha;suborder__nematocera;infraclass endopterygota;subclass neoptera;superclass hexapoda;superkingdom__eukaryota	95.3488	0	823.622			0	3	2	0	0	1	1	0	1	1	3	5	1	0	3	0	1	0	2	4	0	1	1	1	3	0	3	1	1	3	3	2	1	0	1	1	0	22	44	211	8	17	201
Zotu57	culex nigripalpus ;k__metazoa;p__arthropoda;c__insecta;o__diptera;f__culicidae;g__culex;s__culex nigripalpus;subgenus culex;tribe__culicini;subfamily__culicinae;superfamily__culicoidea;infraorder__culicomorpha;suborder__nematocera;infraclass endopterygota;subclass neoptera;superclass hexapoda;superkingdom__eukaryota	95.3935	0	837.148			2	5	2	3	2	1	4	0	4	1	2	4	2	3	2	2	4	2	2	2	1	1	1	1	5	0	4	1	5	4	3	1	1	0	1	3	1	170	17	5	131	31	495
Zotu58	culex nigripalpus ;k__metazoa;p__arthropoda;c__insecta;o__diptera;f__culicidae;g__culex;s__culex nigripalpus;subgenus culex;tribe__culicini;subfamily__culicinae;superfamily__culicoidea;infraorder__culicomorpha;suborder__nematocera;infraclass endopterygota;subclass neoptera;superclass hexapoda;superkingdom__eukaryota	95.1923	0	829.934			1	4	4	2	1	4	2	0	3	1	4	5	6	5	3	1	3	2	1	3	2	1	2	2	3	1	3	2	2	2	2	5	2	1	1	1	1	262	293	975	185	27	25
Zotu59	ganoderma orbiforme ;k__fungi;p__basidiomycota;c__agaricomycetes;o__polyporales;f__polyporaceae;g__ganoderma;s__ganoderma orbiforme; superkingdom__bacteria;species__candidatus gloeomargarita;superkingdom__bacteria;strain__candidatus gloeomargarita;species__candidatus gloeomargarita;superkingdom__bacteria;species__candidatus gloeomargarita;subfamily__melolonthinae;superfamily__scarabaeoidea;infrao…	95.4545	2.5143e-123	447.62			13	18	0	0	0	0	1	1	0	1	0	21	5	0	0	6	0	0	0	8	3	0	0	1	14	0	0	0	2	0	13	2	0	0	0	0	0	12	55	14	15	19	0
Zotu60	culex nigripalpus ;k__metazoa;p__arthropoda;c__insecta;o__diptera;f__culicidae;g__culex;s__culex nigripalpus;subgenus culex;tribe__culicini;subfamily__culicinae;superfamily__culicoidea;infraorder__culicomorpha;suborder__nematocera;infraclass endopterygota;subclass neoptera;superclass hexapoda;superkingdom__eukaryota	98.2692	0	893.954			31	19	17	17	19	17	15	15	13	10	18	21	28	15	15	21	11	21	14	16	11	18	18	18	19	10	19	24	14	18	15	16	20	7	16	8	10	520	1507	362	2266	1043	6708
Zotu61	culex nigripalpus ;k__metazoa;p__arthropoda;c__insecta;o__diptera;f__culicidae;g__culex;s__culex nigripalpus;subgenus culex;tribe__culicini;subfamily__culicinae;superfamily__culicoidea;infraorder__culicomorpha;suborder__nematocera;infraclass endopterygota;subclass neoptera;superclass hexapoda;superkingdom__eukaryota	98.062	0	878.625			6	4	4	3	4	6	5	7	5	3	2	7	7	4	3	6	4	1	5	4	4	2	7	6	1	0	3	5	3	6	6	0	1	1	2	3	1	34	145	317	64	47	112
Zotu62	No hits found						0	2	0	2	1	1	0	0	71	0	2	0	2	1	0	1	155	0	0	0	0	0	0	0	0	0	0	0	0	0	0	0	0	0	0	0	0	0	0	0	0	0	0
Zotu63	helonias bullata ;k__viridiplantae;p__streptophyta;c__magnoliopsida;o__liliales;f__melanthiaceae;g__helonias;s__helonias bullata; subclass petrosaviidae;subphylum__streptophytina;superkingdom__eukaryota;	82.5	7.67024	38.2554			0	0	0	0	0	0	0	0	0	893	1	0	0	2	0	0	0	0	0	0	0	0	0	0	0	0	0	0	0	0	0	0	1	0	0	0	0	0	0	0	0	0	0
Zotu64	culex nigripalpus ;k__metazoa;p__arthropoda;c__insecta;o__diptera;f__culicidae;g__culex;s__culex nigripalpus;subgenus culex;tribe__culicini;subfamily__culicinae;superfamily__culicoidea;infraorder__culicomorpha;suborder__nematocera;infraclass endopterygota;subclass neoptera;superclass hexapoda;superkingdom__eukaryota	95.2015	0	832.639			2	1	1	0	0	2	0	1	0	0	1	1	1	0	0	0	0	0	0	0	1	3	0	2	2	0	0	0	1	1	1	0	1	0	2	0	0	44	8	18	5	2	4
Zotu65	culex nigripalpus ;k__metazoa;p__arthropoda;c__insecta;o__diptera;f__culicidae;g__culex;s__culex nigripalpus;subgenus culex;tribe__culicini;subfamily__culicinae;superfamily__culicoidea;infraorder__culicomorpha;suborder__nematocera;infraclass endopterygota;subclass neoptera;superclass hexapoda;superkingdom__eukaryota	98.6434	0	896.659			12	8	9	8	7	11	9	10	12	9	5	9	9	8	6	10	5	4	10	7	5	11	10	14	5	8	7	6	4	4	5	6	7	3	2	3	7	39	9842	72	720	37	193
Zotu66	culex nigripalpus ;k__metazoa;p__arthropoda;c__insecta;o__diptera;f__culicidae;g__culex;s__culex nigripalpus;subgenus culex;tribe__culicini;subfamily__culicinae;superfamily__culicoidea;infraorder__culicomorpha;suborder__nematocera;infraclass endopterygota;subclass neoptera;superclass hexapoda;superkingdom__eukaryota	96.8992	0	849.771			1	2	3	0	3	2	2	1	2	3	1	1	3	1	0	5	1	0	4	5	1	1	2	2	2	0	0	0	1	1	2	0	0	0	0	1	0	5	4	5010	5	57	1
Zotu67	thinophilus nitens ;k__metazoa;p__arthropoda;c__insecta;o__diptera;f__dolichopodidae;g__thinophilus;s__thinophilus nitens;subfamily__hydrophorinae;superfamily__empidoidea;infraorder__muscomorpha;suborder__brachycera;infraclass endopterygota;subclass neoptera;superclass hexapoda;superkingdom__eukaryota	92.8571	1.7474	39.157			0	0	0	0	326	0	0	0	0	0	3	0	0	0	0	0	0	0	0	0	0	0	0	0	0	0	0	0	0	0	0	0	0	0	0	0	0	0	0	0	0	0	0
Zotu68	___xm_003005510.1__gi:302415448_ ;k__fungi;p__ascomycota;c__sordariomycetes;o__glomerellales;f__plectosphaerellaceae;g__verticillium;s__verticillium alfalfae; subclass hypocreomycetidae;subphylum__pezizomycotina;subkingdom__dikarya;superkingdom__eukaryota;	90	4.58486	38.2554			0	0	1	0	0	0	0	1	0	0	0	0	0	0	0	0	0	0	0	0	0	0	0	0	0	0	0	0	0	0	0	0	0	0	0	1	0	0	0	0	0	0	0
Zotu69	culex nigripalpus ;k__metazoa;p__arthropoda;c__insecta;o__diptera;f__culicidae;g__culex;s__culex nigripalpus;subgenus culex;tribe__culicini;subfamily__culicinae;superfamily__culicoidea;infraorder__culicomorpha;suborder__nematocera;infraclass endopterygota;subclass neoptera;superclass hexapoda;superkingdom__eukaryota	94.5631	0	805.589			3	3	1	0	5	2	3	1	3	0	0	0	1	1	2	2	1	3	1	2	1	1	1	2	3	1	1	1	1	3	2	3	0	0	0	0	0	755	173	759	102	1866	53
Zotu70	culex nigripalpus ;k__metazoa;p__arthropoda;c__insecta;o__diptera;f__culicidae;g__culex;s__culex nigripalpus;subgenus culex;tribe__culicini;subfamily__culicinae;superfamily__culicoidea;infraorder__culicomorpha;suborder__nematocera;infraclass endopterygota;subclass neoptera;superclass hexapoda;superkingdom__eukaryota	97.0646	0	863.297			2	1	6	4	1	4	0	2	7	1	1	4	12	0	3	3	2	3	4	2	3	2	7	3	0	1	5	3	3	2	1	2	2	1	1	3	2	125	12	422	631	1786	79
Zotu71	culex nigripalpus ;k__metazoa;p__arthropoda;c__insecta;o__diptera;f__culicidae;g__culex;s__culex nigripalpus;subgenus culex;tribe__culicini;subfamily__culicinae;superfamily__culicoidea;infraorder__culicomorpha;suborder__nematocera;infraclass endopterygota;subclass neoptera;superclass hexapoda;superkingdom__eukaryota	95.3488	0	826.328			5	2	2	1	1	0	1	0	4	0	1	1	0	0	2	1	4	0	2	1	1	1	1	2	1	0	0	2	0	0	0	0	1	0	1	0	0	609	2	66	3	290	2
Zotu72	culex nigripalpus ;k__metazoa;p__arthropoda;c__insecta;o__diptera;f__culicidae;g__culex;s__culex nigripalpus;subgenus culex;tribe__culicini;subfamily__culicinae;superfamily__culicoidea;infraorder__culicomorpha;suborder__nematocera;infraclass endopterygota;subclass neoptera;superclass hexapoda;superkingdom__eukaryota	93.8462	0	793.867			1	0	0	0	2	1	0	2	1	2	1	0	2	1	0	2	1	0	0	3	2	0	2	0	2	0	1	2	0	1	1	1	2	0	2	0	0	61	16	335	1	5	70
Zotu73	___jn164922.1__gi:357216417_ ;k__fungi;p__basidiomycota;c__agaricomycetes;o__polyporales;f__polyporaceae;g__trametes;s__trametes cubensis; subphylum__agaricomycotina;subkingdom__dikarya;superkingdom__eukaryota;	100	1.5289e-138	497.213			0	0	0	0	0	0	0	0	0	0	4	0	12	0	0	0	0	0	0	0	0	0	0	0	0	0	0	100	6	3	6	23	4	0	0	1	0	0	0	1	0	0	0
Zotu74	culex nigripalpus ;k__metazoa;p__arthropoda;c__insecta;o__diptera;f__culicidae;g__culex;s__culex nigripalpus;subgenus culex;tribe__culicini;subfamily__culicinae;superfamily__culicoidea;infraorder__culicomorpha;suborder__nematocera;infraclass endopterygota;subclass neoptera;superclass hexapoda;superkingdom__eukaryota	98.2692	0	893.954			6	1	3	6	1	2	6	3	5	2	0	2	2	1	5	4	5	4	3	1	4	10	5	1	2	1	3	5	3	1	5	6	2	2	3	1	5	57	476	54	7	45	58
Zotu75	___ab094666.1__gi:37998958_ ;k__fungi;p__ascomycota;c__dothideomycetes;o__pleosporales;f__pleosporaceae;g__alternaria;s__alternaria alternata;suborder__pleosporineae;subclass pleosporomycetidae;subphylum__pezizomycotina;subkingdom__dikarya;superkingdom__eukaryota	100	1.31075e-119	434.095			0	0	5	10	6	0	3	4	3	0	0	36	0	0	23	0	0	1	1	0	0	0	0	0	0	0	0	2	1	0	0	30	4	0	0	1	0	0	0	1	0	0	0
Zotu76	culex nigripalpus ;k__metazoa;p__arthropoda;c__insecta;o__diptera;f__culicidae;g__culex;s__culex nigripalpus;subgenus culex;tribe__culicini;subfamily__culicinae;superfamily__culicoidea;infraorder__culicomorpha;suborder__nematocera;infraclass endopterygota;subclass neoptera;superclass hexapoda;superkingdom__eukaryota	98.646	0	897.561			1	1	1	5	5	1	3	1	6	2	3	3	2	3	2	3	4	4	2	4	1	3	1	1	1	6	2	1	3	2	5	4	4	0	1	4	0	28	60	293	238	8	191
Zotu77	culex pilosus ;k__metazoa;p__arthropoda;c__insecta;o__diptera;f__culicidae;g__culex;s__culex pilosus;subgenus mochlostyrax;tribe__culicini;subfamily__culicinae;superfamily__culicoidea;infraorder__culicomorpha;suborder__nematocera;infraclass endopterygota;subclass neoptera;superclass hexapoda;superkingdom__eukaryota	93.1507	5.48692e-20	104.078			0	0	1	0	123	0	1	0	1	0	0	1	0	0	0	147	0	0	0	0	0	0	0	0	0	0	0	0	0	0	0	0	1	0	0	0	0	0	0	1	0	0	0
Zotu78	culex nigripalpus ;k__metazoa;p__arthropoda;c__insecta;o__diptera;f__culicidae;g__culex;s__culex nigripalpus;subgenus culex;tribe__culicini;subfamily__culicinae;superfamily__culicoidea;infraorder__culicomorpha;suborder__nematocera;infraclass endopterygota;subclass neoptera;superclass hexapoda;superkingdom__eukaryota	96.325	0	853.378			2	3	4	1	4	2	1	1	7	1	5	4	2	3	1	6	9	0	1	2	2	4	1	1	2	1	4	2	3	0	5	1	4	0	1	1	4	188	178	407	536	287	285
Zotu79	culex nigripalpus ;k__metazoa;p__arthropoda;c__insecta;o__diptera;f__culicidae;g__culex;s__culex nigripalpus;subgenus culex;tribe__culicini;subfamily__culicinae;superfamily__culicoidea;infraorder__culicomorpha;suborder__nematocera;infraclass endopterygota;subclass neoptera;superclass hexapoda;superkingdom__eukaryota	96.9052	0	852.476			3	2	0	2	6	0	4	1	0	0	1	1	7	1	0	2	3	1	1	1	0	2	1	2	0	0	1	1	0	2	2	1	1	2	2	2	1	35	16	27	4	162	11
Zotu80	culex nigripalpus ;k__metazoa;p__arthropoda;c__insecta;o__diptera;f__culicidae;g__culex;s__culex nigripalpus;subgenus culex;tribe__culicini;subfamily__culicinae;superfamily__culicoidea;infraorder__culicomorpha;suborder__nematocera;infraclass endopterygota;subclass neoptera;superclass hexapoda;superkingdom__eukaryota	98.6538	0	902.971			11	5	6	11	8	5	5	4	7	3	5	6	13	7	3	5	4	1	1	11	4	3	8	6	5	5	5	4	9	6	6	3	3	2	6	3	1	42	464	822	1816	435	238
Zotu81	culex nigripalpus ;k__metazoa;p__arthropoda;c__insecta;o__diptera;f__culicidae;g__culex;s__culex nigripalpus;subgenus culex;tribe__culicini;subfamily__culicinae;superfamily__culicoidea;infraorder__culicomorpha;suborder__nematocera;infraclass endopterygota;subclass neoptera;superclass hexapoda;superkingdom__eukaryota	94.971	0	812.802			0	1	2	1	0	1	0	2	2	0	0	0	0	0	0	0	2	1	1	1	1	0	1	1	1	0	0	1	0	2	1	2	1	0	1	1	0	4	0	7	6	1	2
Zotu82	culex erraticus ;k__metazoa;p__arthropoda;c__insecta;o__diptera;f__culicidae;g__culex;s__culex erraticus;subgenus melanoconion;tribe__culicini;subfamily__culicinae;superfamily__culicoidea;infraorder__culicomorpha;suborder__nematocera;infraclass endopterygota;subclass neoptera;superclass hexapoda;superkingdom__eukaryota	88.2353	4.87926e-21	107.685			39	21	8	19	143	7	7	27	15	16	13	14	20	20	124	21	23	0	0	0	0	0	0	0	0	0	0	0	0	0	0	0	0	0	0	0	0	0	0	0	0	2	0
Zotu83	ganoderma orbiforme ;k__fungi;p__basidiomycota;c__agaricomycetes;o__polyporales;f__polyporaceae;g__ganoderma;s__ganoderma orbiforme; superkingdom__bacteria;species__candidatus gloeomargarita;superkingdom__bacteria;strain__candidatus gloeomargarita;species__candidatus gloeomargarita;superkingdom__bacteria;species__candidatus gloeomargarita;subfamily__melolonthinae;superfamily__scarabaeoidea;infrao…	95.1049	3.06305e-122	443.112			20	0	0	0	0	0	0	0	1	0	0	1	8	0	0	0	0	0	0	2	4	0	0	0	0	0	0	0	0	0	0	1	0	0	0	0	0	0	19	42	0	0	0
Zotu84	culex nigripalpus ;k__metazoa;p__arthropoda;c__insecta;o__diptera;f__culicidae;g__culex;s__culex nigripalpus;subgenus culex;tribe__culicini;subfamily__culicinae;superfamily__culicoidea;infraorder__culicomorpha;suborder__nematocera;infraclass endopterygota;subclass neoptera;superclass hexapoda;superkingdom__eukaryota	98.2524	0	883.134			4	4	4	0	1	1	3	3	0	3	2	4	1	5	4	3	3	4	1	3	0	4	4	0	5	0	1	4	4	4	2	2	1	2	1	1	2	554	136	172	31	701	4456
Zotu85	culex nigripalpus ;k__metazoa;p__arthropoda;c__insecta;o__diptera;f__culicidae;g__culex;s__culex nigripalpus;subgenus culex;tribe__culicini;subfamily__culicinae;superfamily__culicoidea;infraorder__culicomorpha;suborder__nematocera;infraclass endopterygota;subclass neoptera;superclass hexapoda;superkingdom__eukaryota	96.3391	0	851.575			1	1	0	1	0	0	1	0	2	0	0	0	2	3	1	2	1	0	1	0	0	3	0	0	0	0	1	0	2	0	3	2	0	1	0	0	0	31	9	10	2	6	7
Zotu86	culex pilosus ;k__metazoa;p__arthropoda;c__insecta;o__diptera;f__culicidae;g__culex;s__culex pilosus;subgenus mochlostyrax;tribe__culicini;subfamily__culicinae;superfamily__culicoidea;infraorder__culicomorpha;suborder__nematocera;infraclass endopterygota;subclass neoptera;superclass hexapoda;superkingdom__eukaryota	93.1507	6.49839e-20	104.078			28	10	97	13	73	12	2587	47	162	7	234	172	58	8	137	38	12	1	3	2	1	2	0	1	1	1	0	2	4	4	1	2	2	0	0	0	1	1	1	4	2	0	1
Zotu87	culex nigripalpus ;k__metazoa;p__arthropoda;c__insecta;o__diptera;f__culicidae;g__culex;s__culex nigripalpus;subgenus culex;tribe__culicini;subfamily__culicinae;superfamily__culicoidea;infraorder__culicomorpha;suborder__nematocera;infraclass endopterygota;subclass neoptera;superclass hexapoda;superkingdom__eukaryota	93.7864	0	792.064			0	0	0	2	1	0	0	0	0	0	0	1	0	0	0	0	0	1	0	0	0	1	0	0	0	0	0	1	0	0	0	0	0	0	1	0	0	146	55	15	2	2	1
Zotu88	culex nigripalpus ;k__metazoa;p__arthropoda;c__insecta;o__diptera;f__culicidae;g__culex;s__culex nigripalpus;subgenus culex;tribe__culicini;subfamily__culicinae;superfamily__culicoidea;infraorder__culicomorpha;suborder__nematocera;infraclass endopterygota;subclass neoptera;superclass hexapoda;superkingdom__eukaryota	97.4757	0	865.1			2	1	2	3	2	3	1	2	1	2	1	0	6	3	2	4	2	2	2	1	3	2	2	3	2	1	2	2	1	0	3	0	1	0	3	2	0	903	190	405	39	2918	53
Zotu89	___af455436.1__gi:21666866_ ;k__fungi;p__ascomycota;c__eurotiomycetes;o__eurotiales;f__aspergillaceae;g__penicillium;s__penicillium commune;subclass eurotiomycetidae;subphylum__pezizomycotina;subkingdom__dikarya;superkingdom__eukaryota	100	1.47315e-125	453.932			0	0	0	1	2	106	0	0	0	0	0	5	0	0	0	0	1	0	0	0	0	0	1	0	0	0	0	0	0	0	0	0	0	0	0	0	0	0	0	0	1	0	0
Zotu90	___eu030125.1__gi:154431699_ ;k__fungi;p__basidiomycota;c__agaricomycetes;o__polyporales;f__polyporaceae;g__coriolopsis;s__coriolopsis caperata; subphylum__agaricomycotina;subkingdom__dikarya;superkingdom__eukaryota;	100	1.07851e-102	378.19			43	0	0	0	1	0	0	0	0	0	0	0	0	0	0	0	0	0	0	0	0	0	2	0	0	0	1	0	0	0	0	0	0	1	0	0	0	0	46	10	0	8	6
Zotu91	culex pilosus ;k__metazoa;p__arthropoda;c__insecta;o__diptera;f__culicidae;g__culex;s__culex pilosus;subgenus mochlostyrax;tribe__culicini;subfamily__culicinae;superfamily__culicoidea;infraorder__culicomorpha;suborder__nematocera;infraclass endopterygota;subclass neoptera;superclass hexapoda;superkingdom__eukaryota	91.7808	2.49217e-18	99.5699			0	0	0	1	0	0	1	223	0	0	0	1	205	83	1	0	0	0	0	0	0	0	2	0	0	0	0	0	1	0	0	0	0	0	1	0	0	0	0	0	0	0	0
Zotu92	___jn182920.1__gi:342674548_ ;k__fungi;p__basidiomycota;c__agaricomycetes;o__polyporales;f__meripilaceae;g__physisporinus;s__physisporinus vitreus; subphylum__agaricomycotina;subkingdom__dikarya;superkingdom__eukaryota;	99.2308	1.33566e-126	457.539			0	0	0	0	18	4	0	1	0	0	1	0	0	0	0	0	0	0	0	0	3	0	0	0	0	9	1	0	0	0	0	0	0	0	7	0	0	0	0	0	13	0	42
Zotu93	culex nigripalpus ;k__metazoa;p__arthropoda;c__insecta;o__diptera;f__culicidae;g__culex;s__culex nigripalpus;subgenus culex;tribe__culicini;subfamily__culicinae;superfamily__culicoidea;infraorder__culicomorpha;suborder__nematocera;infraclass endopterygota;subclass neoptera;superclass hexapoda;superkingdom__eukaryota	95.7529	0	838.049			1	0	2	0	0	1	0	1	1	0	0	0	0	1	1	2	1	0	1	2	0	0	1	0	1	0	0	1	1	1	0	3	2	0	0	1	0	42	2	30	47	16	9
Zotu94	culex nigripalpus ;k__metazoa;p__arthropoda;c__insecta;o__diptera;f__culicidae;g__culex;s__culex nigripalpus;subgenus culex;tribe__culicini;subfamily__culicinae;superfamily__culicoidea;infraorder__culicomorpha;suborder__nematocera;infraclass endopterygota;subclass neoptera;superclass hexapoda;superkingdom__eukaryota	98.2659	0	893.954			7	10	9	12	8	2	8	10	9	6	12	7	11	8	5	12	5	10	12	10	8	7	11	10	4	2	3	8	9	9	6	10	7	1	8	2	6	989	5044	366	146	2069	1290
Zotu95	culex nigripalpus ;k__metazoa;p__arthropoda;c__insecta;o__diptera;f__culicidae;g__culex;s__culex nigripalpus;subgenus culex;tribe__culicini;subfamily__culicinae;superfamily__culicoidea;infraorder__culicomorpha;suborder__nematocera;infraclass endopterygota;subclass neoptera;superclass hexapoda;superkingdom__eukaryota	98.0658	0	881.33			3	2	1	2	0	1	2	3	0	2	3	1	2	1	1	4	1	3	1	2	1	2	1	1	2	1	1	1	0	3	2	0	0	0	0	2	1	10	50	11	4	43	3268
Zotu96	___fj882040.1__gi:269969917_ ;k__fungi;p__basidiomycota;c__agaricomycetes;o__russulales;f__peniophoraceae;g__peniophora;s__peniophora laxitexta;subkingdom__dikarya;superkingdom__eukaryota	98.2063	6.811e-105	385.404			0	0	0	0	0	0	1	0	1	0	0	0	0	0	0	0	0	0	0	0	0	0	0	0	0	0	0	0	0	0	0	0	0	0	0	0	0	0	0	0	0	0	0
Zotu97	___gq267480.1__gi:254351295_ ;k__fungi;p__basidiomycota;c__agaricomycetes;o__thelephorales;f__thelephoraceae;g__pseudotomentella;s__pseudotomentella tristis;subkingdom__dikarya;superkingdom__eukaryota	96.4912	2.05994e-17	95.0615			0	0	0	1	1	0	0	0	0	0	0	0	0	0	0	0	0	1	0	0	0	0	0	0	0	0	0	1	0	0	0	0	0	0	0	0	0	0	0	0	0	0	0
Zotu98	culex nigripalpus ;k__metazoa;p__arthropoda;c__insecta;o__diptera;f__culicidae;g__culex;s__culex nigripalpus;subgenus culex;tribe__culicini;subfamily__culicinae;superfamily__culicoidea;infraorder__culicomorpha;suborder__nematocera;infraclass endopterygota;subclass neoptera;superclass hexapoda;superkingdom__eukaryota	96.7054	0	845.263			0	0	1	2	0	0	0	0	0	0	1	0	0	0	2	1	1	1	0	0	0	0	0	1	0	0	1	1	0	0	1	1	1	0	1	1	1	0	1	4	1	1512	0
Zotu99	___ay124130.1__gi:22530833_ ;k__fungi;p__ascomycota;c__lecanoromycetes;o__peltigerales;f__nephromataceae;g__nephroma;s__nephroma bellum;suborder__peltigerineae;subclass lecanoromycetidae;subphylum__pezizomycotina;subkingdom__dikarya;superkingdom__eukaryota	98.1481	1.01961e-16	94.1598			0	0	0	0	0	0	0	0	0	0	0	0	0	0	0	0	0	1	1	1	0	0	0	0	0	0	0	0	1	0	0	0	0	0	0	0	0	0	0	0	0	0	0
Zotu100	culex nigripalpus ;k__metazoa;p__arthropoda;c__insecta;o__diptera;f__culicidae;g__culex;s__culex nigripalpus;subgenus culex;tribe__culicini;subfamily__culicinae;superfamily__culicoidea;infraorder__culicomorpha;suborder__nematocera;infraclass endopterygota;subclass neoptera;superclass hexapoda;superkingdom__eukaryota	99.2248	0	910.184			20	9	7	5	2	4	6	5	4	2	8	5	5	1	7	14	11	9	6	2	6	4	3	4	3	0	1	3	4	7	1	4	4	3	0	4	7	39	161	1787	4668	167	74
Zotu101	___fj430590.1__gi:238056460_ ;k__fungi;p__ascomycota;c__sordariomycetes;o__xylariales;f__xylariales;g__diatrypasimilis;s__diatrypasimilis australiensis;superkingdom__eukaryota;subkingdom__dikarya;subphylum__pezizomycotina;subclass xylariomycetidae	79.0441	6.38585e-55	220.396			0	0	0	0	0	4	0	0	0	0	0	0	0	0	0	0	107	0	0	0	0	0	0	0	0	0	0	0	0	0	0	0	0	0	0	0	0	0	0	0	0	0	0
Zotu102	culex nigripalpus ;k__metazoa;p__arthropoda;c__insecta;o__diptera;f__culicidae;g__culex;s__culex nigripalpus;subgenus culex;tribe__culicini;subfamily__culicinae;superfamily__culicoidea;infraorder__culicomorpha;suborder__nematocera;infraclass endopterygota;subclass neoptera;superclass hexapoda;superkingdom__eukaryota	97.7011	0	881.33			6	5	2	2	4	2	3	4	5	1	4	5	4	6	7	3	7	2	3	3	4	4	2	10	2	2	2	3	4	3	4	4	0	3	3	1	2	499	114	6122	744	871	97
Zotu103	___dq826737.1__gi:110951114_ ;k__fungi;p__ascomycota;c__eurotiomycetes;o__chaetothyriales;f__herpotrichiellaceae;g__capronia;s__capronia pilosella;subclass chaetothyriomycetidae;subphylum__pezizomycotina;subkingdom__dikarya;superkingdom__eukaryota	76.5957	3.80233e-14	84.2413			0	0	0	0	0	0	0	0	0	115	0	0	0	0	0	0	0	0	0	0	0	0	0	0	0	0	0	0	0	0	0	0	0	0	0	0	0	0	0	0	0	0	1
Zotu104	culex nigripalpus ;k__metazoa;p__arthropoda;c__insecta;o__diptera;f__culicidae;g__culex;s__culex nigripalpus;subgenus culex;tribe__culicini;subfamily__culicinae;superfamily__culicoidea;infraorder__culicomorpha;suborder__nematocera;infraclass endopterygota;subclass neoptera;superclass hexapoda;superkingdom__eukaryota	93.7984	0	785.752			0	1	0	1	0	1	0	0	0	0	0	0	0	0	0	1	0	0	0	0	0	0	0	0	0	0	0	0	0	1	0	1	0	0	0	2	0	2	20	758	1	6	3
Zotu105	___ef405864.1__gi:125661831_ ;k__fungi;p__ascomycota;c__dothideomycetes;o__cladosporiales;f__cladosporiaceae;g__cladosporium;s__cladosporium cladosporioides; subclass hypocreomycetidae;subphylum__pezizomycotina;subkingdom__dikarya;superkingdom__eukaryota;species__gondwanamyces;subclass hypocreomycetidae;subphylum__pezizomycotina;subkingdom__dikarya;superkingdom__eukaryota;species__gondwanamyces;s…	99.5652	1.42401e-112	411.553			0	0	0	0	0	1	0	0	0	0	50	14	17	4	0	9	13	0	0	0	0	1	0	1	0	0	0	3	0	1	0	0	2	1	0	0	0	1	0	2	1	0	0
Zotu106	culex pilosus ;k__metazoa;p__arthropoda;c__insecta;o__diptera;f__culicidae;g__culex;s__culex pilosus;subgenus mochlostyrax;tribe__culicini;subfamily__culicinae;superfamily__culicoidea;infraorder__culicomorpha;suborder__nematocera;infraclass endopterygota;subclass neoptera;superclass hexapoda;superkingdom__eukaryota	93.1507	5.88874e-20	104.078			9	2	2	1	14	96	108	0	3	0	4	1	4	0	5	1	1	0	0	0	0	0	0	0	0	0	1	0	0	0	0	0	0	0	0	0	1	0	0	0	0	1	0
Zotu107	___ay571045.1__gi:50346942_ ;k__fungi;p__basidiomycota;c__agaricomycetes;o__agaricales;f__schizophyllaceae;g__henningsomyces;s__henningsomyces puber;subclass agaricomycetidae;subkingdom__dikarya;superkingdom__eukaryota	95.5556	2.76057e-117	426.881			0	0	0	0	0	0	0	0	0	0	0	1	0	0	0	0	4	0	0	0	0	0	0	0	1	0	0	0	0	0	0	0	0	0	6	0	1	1	0	0	99	8	0
Zotu108	helonias bullata ;k__viridiplantae;p__streptophyta;c__magnoliopsida;o__liliales;f__melanthiaceae;g__helonias;s__helonias bullata; subclass petrosaviidae;subphylum__streptophytina;superkingdom__eukaryota;	82.5	7.67024	38.2554			40	1	2	0	0	0	0	0	0	291	25	0	0	0	0	0	0	0	0	0	0	0	0	0	1	0	0	0	0	0	0	0	0	0	0	0	0	0	0	0	0	0	0
Zotu109	___xm_003005510.1__gi:302415448_ ;k__fungi;p__ascomycota;c__sordariomycetes;o__glomerellales;f__plectosphaerellaceae;g__verticillium;s__verticillium alfalfae; subclass hypocreomycetidae;subphylum__pezizomycotina;subkingdom__dikarya;superkingdom__eukaryota;	90	4.58486	38.2554			0	0	0	0	0	0	0	0	0	0	0	0	0	0	0	0	0	0	0	0	0	0	0	0	0	0	0	0	0	0	0	0	0	0	0	0	0	0	98	0	0	0	1
Zotu110	___jn164922.1__gi:357216417_ ;k__fungi;p__basidiomycota;c__agaricomycetes;o__polyporales;f__polyporaceae;g__trametes;s__trametes cubensis; subphylum__agaricomycotina;subkingdom__dikarya;superkingdom__eukaryota;	100	2.2505e-136	489.999			0	0	0	0	0	0	0	0	0	0	0	0	0	0	0	0	0	0	0	0	0	0	0	0	0	0	0	0	0	0	0	0	0	0	0	0	0	0	0	0	0	0	0
Zotu111	culex nigripalpus ;k__metazoa;p__arthropoda;c__insecta;o__diptera;f__culicidae;g__culex;s__culex nigripalpus;subgenus culex;tribe__culicini;subfamily__culicinae;superfamily__culicoidea;infraorder__culicomorpha;suborder__nematocera;infraclass endopterygota;subclass neoptera;superclass hexapoda;superkingdom__eukaryota	99.8058	0	925.513			3	1	0	2	4	1	0	4	2	0	3	2	0	0	1	3	1	0	2	1	2	1	2	2	2	1	0	2	1	1	1	4	1	2	3	3	0	389	59	22	429	109	326
Zotu112	culex nigripalpus ;k__metazoa;p__arthropoda;c__insecta;o__diptera;f__culicidae;g__culex;s__culex nigripalpus;subgenus culex;tribe__culicini;subfamily__culicinae;superfamily__culicoidea;infraorder__culicomorpha;suborder__nematocera;infraclass endopterygota;subclass neoptera;superclass hexapoda;superkingdom__eukaryota	97.3333	0	878.625			6	3	2	3	3	4	5	2	3	2	2	2	6	2	1	2	0	2	2	1	3	1	3	2	4	2	2	4	5	2	4	1	3	0	3	1	0	25	44	93	8	1486	188
Zotu113	___af210819.1__gi:6563323_ ;k__fungi;p__basidiomycota;c__agaricomycetes;o__russulales;f__peniophoraceae;g__peniophora;s__peniophora aurantiaca;subkingdom__dikarya;superkingdom__eukaryota	91.5751	8.36693e-104	382.699			0	0	0	0	0	1	0	11	0	0	0	0	0	0	0	11	0	0	1	0	0	0	0	1	0	0	0	0	0	0	1	0	0	0	0	2	0	0	0	7	0	40	0
Zotu114	culex nigripalpus ;k__metazoa;p__arthropoda;c__insecta;o__diptera;f__culicidae;g__culex;s__culex nigripalpus;subgenus culex;tribe__culicini;subfamily__culicinae;superfamily__culicoidea;infraorder__culicomorpha;suborder__nematocera;infraclass endopterygota;subclass neoptera;superclass hexapoda;superkingdom__eukaryota	94.4015	0	802.884			1	1	2	0	3	2	1	0	2	4	2	3	2	1	1	2	1	0	2	2	1	1	0	2	1	1	2	4	2	0	3	2	0	0	1	5	0	10	86	29	20	8	54
Zotu115	___eu784262.1__gi:209870786_ ;k__fungi;p__basidiomycota;c__agaricomycetes;o__russulales;f__hericiaceae;g__hericium;s__hericium coralloides;subkingdom__dikarya;superkingdom__eukaryota	79.1822	1.29074e-50	205.067			0	0	0	0	0	0	0	0	46	0	0	0	0	0	0	0	0	0	0	0	0	0	0	0	0	0	0	0	0	0	0	0	0	8	0	0	0	0	13	0	0	0	0
Zotu116	No hits found						0	0	0	0	0	0	0	0	0	0	0	0	0	2	0	1	0	0	0	0	0	0	0	0	0	0	0	0	0	0	0	0	0	0	0	0	0	0	0	0	0	0	0
Zotu117	culex nigripalpus ;k__metazoa;p__arthropoda;c__insecta;o__diptera;f__culicidae;g__culex;s__culex nigripalpus;subgenus culex;tribe__culicini;subfamily__culicinae;superfamily__culicoidea;infraorder__culicomorpha;suborder__nematocera;infraclass endopterygota;subclass neoptera;superclass hexapoda;superkingdom__eukaryota	94.4656	0	818.212			2	1	3	1	1	0	1	1	0	1	2	1	2	0	1	0	2	2	1	1	0	2	0	1	0	0	0	2	1	1	1	0	0	1	0	0	2	1618	20	98	135	42	9
Zotu118	___jf951150.1__gi:338809112_ ;k__fungi;p__ascomycota;c__dothideomycetes;o__capnodiales;f__capnodiaceae;g__leptoxyphium;s__leptoxyphium kurandae;subclass dothideomycetidae;subphylum__pezizomycotina;subkingdom__dikarya;superkingdom__eukaryota	99.5516	8.67036e-109	398.929			0	0	0	0	0	0	0	0	0	0	0	0	0	0	0	0	84	0	0	0	0	0	0	0	0	0	0	0	0	0	0	0	0	0	0	0	0	0	0	0	0	0	0
Zotu119	___fj537071.1__gi:254681453_ ;k__fungi;p__ascomycota;c__sordariomycetes;o__xylariales;f__diatrypaceae;g__eutypella;s__eutypella vitis;subclass xylariomycetidae;subphylum__pezizomycotina;subkingdom__dikarya;superkingdom__eukaryota	99.1736	5.73346e-118	428.685			0	0	0	0	0	0	0	0	0	0	0	0	0	0	1	0	0	0	0	0	0	0	0	0	0	0	0	0	0	0	0	0	0	0	0	0	0	0	0	0	0	0	0
Zotu120	___dq647495.1__gi:109644650_ ;k__fungi;p__basidiomycota;c__agaricomycetes;o__corticiales;f__corticiaceae;g__peniophorella;s__hyphoderma rude;subkingdom__dikarya;superkingdom__eukaryota	100	2.89675e-129	466.555			1	0	0	0	0	0	0	0	0	0	0	0	0	0	0	0	0	0	0	0	0	0	0	0	0	0	0	0	0	0	0	1	0	0	0	0	0	0	0	0	0	0	0
Zotu121	culex nigripalpus ;k__metazoa;p__arthropoda;c__insecta;o__diptera;f__culicidae;g__culex;s__culex nigripalpus;subgenus culex;tribe__culicini;subfamily__culicinae;superfamily__culicoidea;infraorder__culicomorpha;suborder__nematocera;infraclass endopterygota;subclass neoptera;superclass hexapoda;superkingdom__eukaryota	95.7364	0	837.148			1	0	0	0	1	0	0	2	0	0	1	1	1	0	0	1	0	0	0	0	1	0	1	1	0	0	0	1	0	1	1	1	0	2	0	0	0	4	27	8	17	1	2
Zotu122	___ay124130.1__gi:22530833_ ;k__fungi;p__ascomycota;c__lecanoromycetes;o__peltigerales;f__nephromataceae;g__nephroma;s__nephroma bellum;suborder__peltigerineae;subclass lecanoromycetidae;subphylum__pezizomycotina;subkingdom__dikarya;superkingdom__eukaryota	98.1481	1.01711e-16	94.1598			0	0	0	0	0	0	0	0	0	0	0	0	0	1	0	0	0	0	0	1	0	0	0	0	0	0	0	0	0	0	0	0	0	0	0	0	0	0	0	1	1	0	0
Zotu123	culex nigripalpus ;k__metazoa;p__arthropoda;c__insecta;o__diptera;f__culicidae;g__culex;s__culex nigripalpus;subgenus culex;tribe__culicini;subfamily__culicinae;superfamily__culicoidea;infraorder__culicomorpha;suborder__nematocera;infraclass endopterygota;subclass neoptera;superclass hexapoda;superkingdom__eukaryota	93.9922	0	790.26			1	0	0	0	1	0	0	0	1	0	1	1	1	0	0	0	2	0	0	0	0	0	0	1	0	0	2	1	0	1	0	0	0	0	0	0	0	101	1	360	6	34	1
Zotu124	___ay216475.1__gi:29373924_ ;k__fungi;p__basidiomycota;c__agaricomycetes;o__agaricales;f__marasmiaceae;g__marasmius;s__marasmius cladophyllus;subclass agaricomycetidae;subkingdom__dikarya;superkingdom__eukaryota	99.2063	2.71195e-122	443.112			0	0	0	0	6	0	0	16	0	0	0	0	1	0	0	0	0	0	0	0	0	0	1	6	7	0	0	1	0	0	2	0	0	0	0	0	0	0	20	7	1	0	0
Zotu125	___ay216475.1__gi:29373924_ ;k__fungi;p__basidiomycota;c__agaricomycetes;o__agaricales;f__marasmiaceae;g__marasmius;s__marasmius cladophyllus;subclass agaricomycetidae;subkingdom__dikarya;superkingdom__eukaryota	98.8095	1.15315e-120	438.603			0	0	0	0	40	0	0	0	0	0	0	17	0	0	0	0	0	0	0	0	0	0	0	0	0	0	0	0	0	0	0	0	0	0	0	0	0	0	0	17	0	0	0
Zotu126	culex nigripalpus ;k__metazoa;p__arthropoda;c__insecta;o__diptera;f__culicidae;g__culex;s__culex nigripalpus;subgenus culex;tribe__culicini;subfamily__culicinae;superfamily__culicoidea;infraorder__culicomorpha;suborder__nematocera;infraclass endopterygota;subclass neoptera;superclass hexapoda;superkingdom__eukaryota	96.8992	0	849.771			0	0	1	1	0	0	0	0	2	1	0	0	1	1	0	3	0	0	0	1	0	0	1	1	1	1	0	0	2	0	0	0	0	1	0	0	1	1	16	1130	275	72	1
Zotu127	culex pilosus ;k__metazoa;p__arthropoda;c__insecta;o__diptera;f__culicidae;g__culex;s__culex pilosus;subgenus mochlostyrax;tribe__culicini;subfamily__culicinae;superfamily__culicoidea;infraorder__culicomorpha;suborder__nematocera;infraclass endopterygota;subclass neoptera;superclass hexapoda;superkingdom__eukaryota	93.1507	5.91645e-20	104.078			139	0	1	0	1	1	88	1	0	0	0	1	0	0	0	196	0	0	0	0	0	1	0	0	0	0	0	0	0	0	0	0	0	0	0	0	0	0	0	0	1	0	0
Zotu128	___dq996040.1__gi:116090385_ ;k__fungi;p__ascomycota;c__sordariomycetes;o__diaporthales;f__valsaceae;g__cytospora;s__cytospora rhizophorae;subclass sordariomycetidae;subphylum__pezizomycotina;subkingdom__dikarya;superkingdom__eukaryota	100	3.2601e-115	419.668			0	0	0	0	0	0	0	0	0	0	3	0	0	1	0	0	0	0	0	0	1	0	0	0	0	0	0	1	4	0	0	0	0	0	0	0	0	0	0	0	0	0	75
Zotu129	___gq409535.1__gi:299483230_ ;k__fungi;p__basidiomycota;c__agaricomycetes;o__polyporales;f__hyphodermataceae;g__hyphoderma;s__hyphoderma puberum; subphylum__agaricomycotina;subkingdom__dikarya;superkingdom__eukaryota;	84.6975	2.94205e-78	297.039			0	0	0	0	0	0	0	0	0	0	0	0	0	0	0	70	0	0	0	0	0	0	0	0	0	0	0	0	0	0	0	0	0	0	0	0	0	0	0	0	0	0	0
Zotu130	___jn164922.1__gi:357216417_ ;k__fungi;p__basidiomycota;c__agaricomycetes;o__polyporales;f__polyporaceae;g__trametes;s__trametes cubensis; subphylum__agaricomycotina;subkingdom__dikarya;superkingdom__eukaryota;	99.6364	6.50107e-137	492.704			3	0	0	0	0	0	0	0	0	0	1	11	0	2	0	0	2	0	0	0	0	0	0	0	0	0	0	15	8	0	0	0	0	0	0	0	0	0	0	0	0	0	0
Zotu131	___ab084616.1__gi:27544648_ ;k__fungi;p__basidiomycota;c__agaricomycetes;o__polyporales;f__meruliaceae;g__phlebia;s__phlebia brevispora; subphylum__agaricomycotina;subkingdom__dikarya;superkingdom__eukaryota;	99.6441	3.743e-140	503.525			0	0	0	0	0	0	0	0	69	0	0	0	0	0	0	0	0	0	0	0	0	0	0	0	0	0	1	0	0	0	0	0	0	0	0	0	0	0	0	0	0	0	0
Zotu132	culex pilosus ;k__metazoa;p__arthropoda;c__insecta;o__diptera;f__culicidae;g__culex;s__culex pilosus;subgenus mochlostyrax;tribe__culicini;subfamily__culicinae;superfamily__culicoidea;infraorder__culicomorpha;suborder__nematocera;infraclass endopterygota;subclass neoptera;superclass hexapoda;superkingdom__eukaryota	93.1507	4.94654e-20	104.078			9	8	9	2	3	4	5	6	4	4	4	2	4512	5	2	4	4	0	0	2	1	0	0	1	0	1	1	2	4	2	2	1	0	0	0	1	1	0	1	1	1	1	1
Zotu133	___fj810129.1__gi:226346583_ ;k__fungi;p__basidiomycota;c__agaricomycetes;o__russulales;f__stereaceae;g__stereum;s__stereum hirsutum;subkingdom__dikarya;superkingdom__eukaryota	84.7015	7.28499e-73	279.005			0	0	0	0	0	0	0	0	1	0	0	0	0	0	0	0	0	0	0	5	0	0	0	0	7	0	0	5	1	0	0	0	0	0	0	0	0	0	0	0	0	0	0
Zotu134	culex nigripalpus ;k__metazoa;p__arthropoda;c__insecta;o__diptera;f__culicidae;g__culex;s__culex nigripalpus;subgenus culex;tribe__culicini;subfamily__culicinae;superfamily__culicoidea;infraorder__culicomorpha;suborder__nematocera;infraclass endopterygota;subclass neoptera;superclass hexapoda;superkingdom__eukaryota	97.5191	0	882.232			9	2	3	2	3	3	4	4	1	2	2	3	5	3	3	3	2	1	0	4	2	1	1	4	1	1	7	2	3	3	6	2	2	2	0	1	0	59	70	33	27	109	42
Zotu135	___eu707868.1__gi:189031672_ ;k__fungi;p__ascomycota;c__dothideomycetes;o__mycosphaerellales;f__teratosphaeriaceae;g__parateratosphaeria;s__teratosphaeria marasasii; subclass dothideomycetidae;subphylum__pezizomycotina;subkingdom__dikarya;superkingdom__eukaryota;	92	8.17008e-84	315.072			0	0	0	0	0	4	3	4	0	0	8	4	1	0	0	8	0	0	0	5	0	0	0	0	0	0	0	4	0	0	1	0	0	0	0	0	0	0	0	0	0	0	0
Zotu136	___ay341338.1__gi:33356633_ ;k__fungi;p__ascomycota;c__taphrinomycetes;o__taphrinales;f__taphrinaceae;g__taphrina;s__taphrina kruchii;subphylum__taphrinomycotina;subkingdom__dikarya;superkingdom__eukaryota	86.0902	2.18187e-79	300.646			0	0	0	0	0	0	0	0	0	0	0	0	0	0	0	0	0	0	0	0	0	0	0	0	0	0	0	0	0	0	0	0	0	0	0	0	0	0	0	0	0	0	0
Zotu137	___dq826549.1__gi:112363298_ ;k__fungi;p__basidiomycota;c__agaricomycetes;o__hymenochaetales;f__hymenochaetales;g__resinicium;s__resinicium saccharicola;superkingdom__eukaryota;subkingdom__dikarya	100	6.62742e-117	425.078			8	0	0	0	0	3	0	0	0	0	0	0	0	0	0	16	0	0	0	0	0	0	0	0	0	0	0	2	0	0	1	0	5	0	0	0	0	0	7	0	8	0	0
Zotu138	___ab210078.1__gi:113208370_ ;k__fungi;p__basidiomycota;c__agaricomycetes;o__polyporales;f__phanerochaetaceae;g__phanerochaete;s__phanerochaete sordida;subkingdom__dikarya;superkingdom__eukaryota	100	5.91415e-131	471.966			0	0	0	0	0	0	0	0	0	0	0	0	0	0	0	0	0	0	0	0	0	0	0	0	0	0	0	0	0	0	0	4	0	0	0	0	0	0	0	1	36	16	0
Zotu139	___fj810171.1__gi:226346625_ ;k__fungi;p__basidiomycota;c__agaricomycetes;o__hymenochaetales;f__hymenochaetaceae;g__hymenochaete;s__hymenochaete adusta;subkingdom__dikarya;superkingdom__eukaryota	85.0667	7.7088e-106	389.912			0	0	0	0	0	0	0	0	0	10	0	0	0	49	0	4	0	1	0	0	0	0	0	0	0	0	0	0	0	0	0	0	0	0	0	0	0	0	0	2	0	0	0
Zotu140	___dq647497.1__gi:109644652_ ;k__fungi;p__basidiomycota;c__agaricomycetes;o__corticiales;f__corticiaceae;g__peniophorella;s__hyphoderma rude;subkingdom__dikarya;superkingdom__eukaryota	100	2.87553e-129	466.555			0	0	0	0	0	0	0	0	1	0	0	0	0	0	0	0	0	0	0	0	0	0	0	0	0	0	0	0	0	0	0	0	0	0	0	0	0	0	0	0	0	0	0
Zotu141	___gu214649.1__gi:284159062_ ;k__fungi;p__ascomycota;c__dothideomycetes;o__capnodiales;f__capnodiaceae;g__polychaeton;s__polychaeton citri;subclass dothideomycetidae;subphylum__pezizomycotina;subkingdom__dikarya;superkingdom__eukaryota	94.7826	1.39662e-93	347.533			0	0	0	0	1	0	0	0	0	0	0	0	0	0	0	0	2	0	0	0	0	0	0	0	0	0	0	1	0	0	0	0	0	1	7	0	0	0	0	0	1	0	21
Zotu142	___fm876211.1__gi:285307442_ ;k__fungi;p__basidiomycota;c__agaricomycetes;o__hymenochaetales;f__schizoporaceae;g__lagarobasidium;s__lagarobasidium detriticum;subkingdom__dikarya;superkingdom__eukaryota	82.5726	1.69325e-55	222.199			0	0	0	0	0	0	0	0	0	0	0	0	0	0	0	0	1	0	0	0	0	0	0	0	0	0	0	0	0	0	0	0	0	0	0	0	0	0	0	0	0	0	0
Zotu143	moniliophthora roreri ;k__fungi;p__basidiomycota;c__agaricomycetes;o__agaricales;f__marasmiaceae;g__moniliophthora;s__moniliophthora roreri;subclass agaricomycetidae;subkingdom__dikarya;superkingdom__eukaryota	100	4.348	37.3537			0	0	0	0	0	0	0	0	0	0	0	0	0	0	0	0	51	0	0	0	0	0	0	0	0	0	0	0	0	0	0	0	0	0	0	0	0	0	0	0	0	0	0
Zotu144	___u66441.1__gi:2289049_ ;k__fungi;p__basidiomycota;c__agaricomycetes;o__hymenochaetales;f__hymenochaetales;g__sphagnomphalia;s__sphagnomphalia brevibasidiata;superkingdom__eukaryota;subkingdom__dikarya	77.5362	1.51626e-18	99.5699			0	0	0	0	0	0	2	0	0	0	0	0	0	0	0	0	0	0	0	0	0	0	2	0	2	0	0	2	0	0	1	1	0	0	0	0	0	0	0	7	11	20	0
Zotu145	___gq919077.1__gi:260875648_ ;k__fungi;p__ascomycota;c__sordariomycetes;o__xylariales;f__apiosporaceae;g__nigrospora;s__nigrospora sphaerica; subclass xylariomycetidae;subphylum__pezizomycotina;subkingdom__dikarya;superkingdom__eukaryota;	100	3.34895e-114	416.061			0	0	0	1	0	0	0	0	0	0	0	0	0	0	0	0	0	0	0	0	0	0	0	0	0	0	0	0	49	0	0	0	0	0	0	0	0	0	0	0	0	0	0
Zotu146	___ef175526.1__gi:140260217_ ;k__fungi;p__basidiomycota;c__agaricomycetes;o__agaricales;f__marasmiaceae;g__tetrapyrgos;s__tetrapyrgos subcinerea;subclass agaricomycetidae;subkingdom__dikarya;superkingdom__eukaryota	94.4056	6.72015e-118	428.685			0	0	0	0	0	1	0	0	1	0	0	0	0	0	0	0	0	0	0	0	0	0	0	0	0	0	0	0	0	0	0	0	0	0	0	0	0	0	0	0	55	1	0
Zotu147	___gq409535.1__gi:299483230_ ;k__fungi;p__basidiomycota;c__agaricomycetes;o__polyporales;f__hyphodermataceae;g__hyphoderma;s__hyphoderma puberum; subphylum__agaricomycotina;subkingdom__dikarya;superkingdom__eukaryota;	85.0534	2.39633e-79	301.547			0	0	0	0	0	0	0	0	0	0	0	0	0	0	0	0	0	0	0	0	0	0	0	0	0	0	0	0	0	0	0	0	0	0	0	0	0	0	0	0	0	0	0
Zotu148	culex nigripalpus ;k__metazoa;p__arthropoda;c__insecta;o__diptera;f__culicidae;g__culex;s__culex nigripalpus;subgenus culex;tribe__culicini;subfamily__culicinae;superfamily__culicoidea;infraorder__culicomorpha;suborder__nematocera;infraclass endopterygota;subclass neoptera;superclass hexapoda;superkingdom__eukaryota	95.3935	0	837.148			0	1	0	0	0	0	1	0	0	1	0	1	0	0	0	1	1	1	1	0	0	1	1	1	2	1	2	0	0	0	1	1	0	0	0	2	0	465	152	397	144	165	13
Zotu149	culex nigripalpus ;k__metazoa;p__arthropoda;c__insecta;o__diptera;f__culicidae;g__culex;s__culex nigripalpus;subgenus culex;tribe__culicini;subfamily__culicinae;superfamily__culicoidea;infraorder__culicomorpha;suborder__nematocera;infraclass endopterygota;subclass neoptera;superclass hexapoda;superkingdom__eukaryota	100	0	930.021			7	5	5	2	3	2	2	1	6	1	4	5	1	1	3	1	2	3	2	3	4	2	2	2	4	1	1	1	3	3	1	6	3	0	4	3	2	2272	194	175	535	535	690
Zotu150	___ay571044.1__gi:50346941_ ;k__fungi;p__basidiomycota;c__agaricomycetes;o__agaricales;f__schizophyllaceae;g__henningsomyces;s__henningsomyces candidus;subclass agaricomycetidae;subkingdom__dikarya;superkingdom__eukaryota	77.1875	3.64523e-52	211.379			0	0	0	0	0	0	0	0	0	0	0	1	0	0	0	0	0	0	0	0	0	0	0	0	0	0	0	0	0	0	0	0	0	0	0	0	0	0	0	0	58	7	0
Zotu151	culex nigripalpus ;k__metazoa;p__arthropoda;c__insecta;o__diptera;f__culicidae;g__culex;s__culex nigripalpus;subgenus culex;tribe__culicini;subfamily__culicinae;superfamily__culicoidea;infraorder__culicomorpha;suborder__nematocera;infraclass endopterygota;subclass neoptera;superclass hexapoda;superkingdom__eukaryota	95.1923	0	829.934			1	2	1	0	0	2	0	1	1	0	2	0	1	0	0	1	2	1	1	1	1	0	1	1	0	1	0	0	1	0	1	1	1	0	0	0	0	12	12	556	9	13	35
Zotu152	lobochlamys culleus ;k__viridiplantae;p__chlorophyta;c__chlorophyceae;o__chlamydomonadales;f__chlamydomonadaceae;g__lobochlamys;s__lobochlamys culleus;superkingdom__eukaryota	76.6667	0.19628	43.6655			1	0	0	0	0	0	0	0	0	0	0	0	0	0	0	0	0	0	0	0	0	0	0	0	0	0	0	0	0	0	0	0	0	0	0	0	0	0	0	0	0	0	0
Zotu153	___ay341338.1__gi:33356633_ ;k__fungi;p__ascomycota;c__taphrinomycetes;o__taphrinales;f__taphrinaceae;g__taphrina;s__taphrina kruchii;subphylum__taphrinomycotina;subkingdom__dikarya;superkingdom__eukaryota	85.8779	3.21051e-77	293.432			0	0	0	0	0	0	0	0	0	0	0	0	0	0	1	0	0	0	0	0	0	0	0	0	0	0	0	0	0	0	0	0	0	0	0	0	0	0	0	0	0	0	0
Zotu154	culex nigripalpus ;k__metazoa;p__arthropoda;c__insecta;o__diptera;f__culicidae;g__culex;s__culex nigripalpus;subgenus culex;tribe__culicini;subfamily__culicinae;superfamily__culicoidea;infraorder__culicomorpha;suborder__nematocera;infraclass endopterygota;subclass neoptera;superclass hexapoda;superkingdom__eukaryota	95.7364	0	837.148			0	0	1	0	0	0	0	0	0	0	0	0	0	1	0	0	0	0	0	0	0	0	0	0	4	0	1	1	1	0	0	0	2	0	0	0	1	0	68	63	11	2	2
Zotu155	___ay509555.1__gi:40846333_ ;k__fungi;p__basidiomycota;c__agaricomycetes;o__auriculariales;f__exidiaceae;g__exidia;s__exidia glandulosa;subkingdom__dikarya;superkingdom__eukaryota	87.2951	5.12919e-74	283.514			7	0	0	0	0	1	0	0	0	0	0	0	1	0	0	0	0	0	0	7	0	0	0	0	0	0	0	0	0	0	0	0	0	0	0	0	0	1	0	18	11	0	0
Zotu156	___fj903297.1__gi:237641516_ ;k__fungi;p__basidiomycota;c__agaricomycetes;o__corticiales;f__corticiaceae;g__sistotrema;s__sistotrema brinkmannii;subkingdom__dikarya;superkingdom__eukaryota	76.7528	1.47903e-43	182.525			0	0	0	0	0	0	0	0	0	0	0	0	0	0	0	0	0	0	0	0	0	0	0	0	0	0	0	0	0	0	0	0	0	0	0	0	0	0	42	0	0	0	0
Zotu157	culex pilosus ;k__metazoa;p__arthropoda;c__insecta;o__diptera;f__culicidae;g__culex;s__culex pilosus;subgenus mochlostyrax;tribe__culicini;subfamily__culicinae;superfamily__culicoidea;infraorder__culicomorpha;suborder__nematocera;infraclass endopterygota;subclass neoptera;superclass hexapoda;superkingdom__eukaryota	93.1507	6.04115e-20	104.078			1	419	8	4	7	2	2916	0	3	0	5	6	3	5	2	1	4	1	0	0	1	4	1	1	1	2	0	2	1	1	1	1	0	1	1	1	1	1	0	2	4	2	1
Zotu158	___eu935573.1__gi:219562430_ ;k__fungi;p__basidiomycota;c__agaricomycetes;o__agaricales;f__marasmiaceae;g__marasmius;s__marasmius nigrobrunneus;forma__marasmius nigrobrunneus nw_2008a;subclass agaricomycetidae;subkingdom__dikarya;superkingdom__eukaryota	99.2982	8.90666e-142	508.033			0	0	0	0	0	0	0	0	0	0	0	0	0	0	0	0	0	0	0	0	0	0	0	0	0	0	0	0	0	0	0	0	0	0	0	0	0	0	0	1	37	0	0
Zotu159	___dq361059.1__gi:86517166_ ;k__fungi;p__ascomycota;c__saccharomycetes;o__saccharomycetales;f__saccharomycopsidaceae;g__arthroascus;s__arthroascus fermentans;subphylum__saccharomycotina;subkingdom__dikarya;superkingdom__eukaryota	98.9583	3.57551e-141	507.131			0	0	0	0	0	0	0	0	0	0	0	0	0	0	0	0	0	0	0	0	0	0	0	0	0	0	0	0	0	0	0	0	0	0	0	0	0	0	0	0	0	0	0
Zotu160	___ef175514.1__gi:140260205_ ;k__fungi;p__basidiomycota;c__agaricomycetes;o__agaricales;f__omphalotaceae;g__marasmiellus;s__marasmiellus candidus; subclass agaricomycetidae;subphylum__agaricomycotina;subkingdom__dikarya;superkingdom__eukaryota;	92.9825	1.47434e-113	414.258			0	0	0	0	0	0	0	0	0	0	0	0	0	0	0	1	0	0	0	1	0	0	0	0	0	0	0	0	0	0	0	0	0	13	14	0	0	0	0	0	0	0	0
Zotu161	___gq303287.1__gi:258578862_ ;k__fungi;p__ascomycota;c__sordariomycetes;o__xylariales;f__xylariales;g__polyscytalum;s__polyscytalum algarvense; subclass xylariomycetidae;subphylum__pezizomycotina;subkingdom__dikarya;superkingdom__eukaryota;	80.083	5.829e-48	196.952			0	0	0	0	0	0	0	0	0	0	0	0	0	0	0	0	0	0	0	0	0	0	1	0	0	0	0	0	0	0	0	0	0	0	0	0	0	0	0	0	0	0	37
Zotu162	___eu552138.1__gi:189909466_ ;k__fungi;p__ascomycota;c__dothideomycetes;o__pleosporales;f__lophiostomataceae;g__lophiostoma;s__lophiostoma cynaroidis;subclass pleosporomycetidae;subphylum__pezizomycotina;subkingdom__dikarya;superkingdom__eukaryota	82.5503	1.90093e-29	135.637			0	0	0	0	0	0	0	0	0	0	0	0	0	0	0	0	0	1	0	0	0	0	0	0	0	0	0	0	0	0	0	0	0	0	0	0	0	0	0	0	0	0	0
Zotu163	___eu118629.1__gi:157057281_ ;k__fungi;p__basidiomycota;c__agaricomycetes;o__corticiales;f__corticiaceae;g__haplotrichum;s__haplotrichum curtisii;subkingdom__dikarya;superkingdom__eukaryota	75.9124	1.42868e-43	181.623			0	0	0	0	0	0	0	0	0	0	0	0	0	0	1	0	0	0	0	0	0	0	0	0	0	0	0	0	0	0	0	0	0	0	0	0	0	0	0	0	0	0	0
Zotu164	___ef175514.1__gi:140260205_ ;k__fungi;p__basidiomycota;c__agaricomycetes;o__agaricales;f__omphalotaceae;g__marasmiellus;s__marasmiellus candidus; subclass agaricomycetidae;subphylum__agaricomycotina;subkingdom__dikarya;superkingdom__eukaryota;	92.6316	6.26904e-112	409.749			0	0	0	0	0	0	0	0	0	0	0	0	0	0	0	38	0	0	0	0	0	0	0	0	0	0	0	0	0	0	0	0	0	0	0	0	0	0	0	0	0	0	0
Zotu165	___dq534563.1__gi:108744853_ ;k__fungi;p__basidiomycota;c__agaricomycetes;o__boletales;f__boletaceae;g__tylopilus;s__porphyrellus porphyrosporus;subfamily__boletoideae;suborder__boletineae;subclass agaricomycetidae;subkingdom__dikarya;superkingdom__eukaryota	80.5085	1.91479e-18	98.6682			0	0	0	1	0	0	0	0	0	0	0	0	0	0	0	0	0	1	0	0	0	0	0	0	0	0	0	0	0	0	0	0	0	0	0	0	0	0	0	0	20	0	0
Zotu166	culex nigripalpus ;k__metazoa;p__arthropoda;c__insecta;o__diptera;f__culicidae;g__culex;s__culex nigripalpus;subgenus culex;tribe__culicini;subfamily__culicinae;superfamily__culicoidea;infraorder__culicomorpha;suborder__nematocera;infraclass endopterygota;subclass neoptera;superclass hexapoda;superkingdom__eukaryota	99.0329	0	906.577			1	0	0	0	1	0	1	0	1	0	0	0	1	0	1	1	0	0	0	0	0	0	0	1	0	1	1	0	0	0	0	0	0	0	0	0	0	10	5	27	9	174	57
Zotu167	cryptococcus albidus ;k__fungi;p__basidiomycota;c__tremellomycetes;o__tremellales;f__cryptococcaceae;g__cryptococcus;s__cryptococcus albidus; subphylum__agaricomycotina;subkingdom__dikarya;superkingdom__eukaryota;	100	3.34895e-114	416.061			0	0	0	0	0	0	1	0	0	0	0	0	0	0	0	0	0	0	0	0	0	0	0	0	0	0	0	0	0	0	4	0	0	0	0	0	0	0	0	0	0	30	0
Zotu168	___gu258309.1__gi:294938564_ ;k__fungi;p__basidiomycota;c__agaricomycetes;o__russulales;f__russulaceae;g__lactarius;s__lactarius wirrabara;subkingdom__dikarya;superkingdom__eukaryota	100	2.92924e-16	91.4547			0	0	0	0	0	0	1	0	0	0	0	0	0	0	0	0	0	0	0	0	1	0	0	0	0	0	0	1	0	0	0	0	0	0	0	0	0	0	0	4	0	0	0
Zotu169	culex pilosus ;k__metazoa;p__arthropoda;c__insecta;o__diptera;f__culicidae;g__culex;s__culex pilosus;subgenus mochlostyrax;tribe__culicini;subfamily__culicinae;superfamily__culicoidea;infraorder__culicomorpha;suborder__nematocera;infraclass endopterygota;subclass neoptera;superclass hexapoda;superkingdom__eukaryota	93.1507	6.38755e-20	104.078			0	0	0	0	0	0	1	273	0	0	1	1	0	0	0	0	0	0	0	0	0	0	0	0	0	0	0	0	0	0	0	0	0	0	0	0	0	0	0	1	0	0	0
Zotu170	___jf440592.1__gi:328942620_ ;k__fungi;p__ascomycota;c__sordariomycetes;o__sordariales;f__lasiosphaeriaceae;g__fimetariella;s__fimetariella rabenhorstii;subclass sordariomycetidae;subphylum__pezizomycotina;subkingdom__dikarya;superkingdom__eukaryota	93.3884	3.46981e-95	352.943			0	0	0	0	0	0	3	0	0	0	0	0	0	0	0	0	0	0	0	0	0	0	0	0	0	0	0	0	0	0	0	0	0	0	0	0	0	0	0	0	0	0	0
Zotu171	___ab512315.1__gi:254553112_ ;k__fungi;p__basidiomycota;c__agaricomycetes;o__agaricales;f__omphalotaceae;g__marasmiellus;s__marasmiellus candidus; subclass agaricomycetidae;subphylum__agaricomycotina;subkingdom__dikarya;superkingdom__eukaryota;	97.2441	2.32695e-117	427.783			0	0	0	0	0	0	0	0	0	0	0	0	0	0	0	38	0	0	0	0	0	0	0	0	0	0	0	0	0	0	1	0	0	0	0	0	1	0	0	0	0	0	0
Zotu172	___ay509555.1__gi:40846333_ ;k__fungi;p__basidiomycota;c__agaricomycetes;o__auriculariales;f__exidiaceae;g__exidia;s__exidia glandulosa;subkingdom__dikarya;superkingdom__eukaryota	87.0833	7.53812e-72	276.3			0	0	0	0	0	0	0	0	0	0	0	0	0	0	0	0	0	0	0	0	0	0	0	0	0	0	0	0	0	0	0	0	0	0	0	0	0	0	0	0	0	0	0
Zotu173	culex nigripalpus ;k__metazoa;p__arthropoda;c__insecta;o__diptera;f__culicidae;g__culex;s__culex nigripalpus;subgenus culex;tribe__culicini;subfamily__culicinae;superfamily__culicoidea;infraorder__culicomorpha;suborder__nematocera;infraclass endopterygota;subclass neoptera;superclass hexapoda;superkingdom__eukaryota	93.9922	0	790.26			1	0	0	0	1	0	0	0	0	1	0	1	0	0	0	0	0	1	0	0	0	0	1	0	0	0	0	0	0	1	0	0	0	0	0	0	0	1	1	526	1	1	1
Zotu174	___hq607954.1__gi:312434432_ ;k__fungi;p__basidiomycota;c__agaricomycetes;o__polyporales;f__meruliaceae;g__phlebia;s__phlebia subserialis; subphylum__agaricomycotina;subkingdom__dikarya;superkingdom__eukaryota;	86.2191	8.75655e-85	319.581			0	0	0	0	0	0	0	0	0	0	0	0	0	0	0	0	0	0	0	0	0	0	0	0	0	0	0	1	0	0	0	4	0	0	0	0	0	0	0	0	0	0	0
Zotu175	hyphoderma obtusiforme ;k__fungi;p__basidiomycota;c__agaricomycetes;o__polyporales;f__hyphodermataceae;g__hyphoderma;s__hyphoderma obtusiforme; subphylum__agaricomycotina;subkingdom__dikarya;superkingdom__eukaryota;	81.0526	1.87684e-61	241.134			0	0	0	0	0	0	0	0	0	0	0	1	0	0	0	0	0	0	0	2	0	0	0	0	0	0	0	0	0	0	0	0	0	0	0	0	0	0	0	0	15	0	0
Zotu176	pteris vittata ;k__viridiplantae;p__streptophyta;c__polypodiopsida;o__polypodiales;f__pteridaceae;g__pteris;s__pteris vittata; subfamily__pteridoideae;suborder__pteridineae;subclass polypodiidae;subphylum__streptophytina;superkingdom__eukaryota;	82.7434	3.08786e-57	226.707			0	0	0	0	0	0	0	7	0	0	0	0	0	0	0	0	0	0	0	0	0	0	2	0	11	0	0	0	0	0	0	0	0	0	0	0	1	0	0	0	6	0	0
Zotu177	culex nigripalpus ;k__metazoa;p__arthropoda;c__insecta;o__diptera;f__culicidae;g__culex;s__culex nigripalpus;subgenus culex;tribe__culicini;subfamily__culicinae;superfamily__culicoidea;infraorder__culicomorpha;suborder__nematocera;infraclass endopterygota;subclass neoptera;superclass hexapoda;superkingdom__eukaryota	95.5426	0	829.934			0	0	0	1	1	1	0	0	0	0	1	2	1	1	0	1	2	0	1	1	0	0	1	1	0	0	2	0	0	0	0	0	1	0	0	0	1	0	15	26	22	11	336
Zotu178	anthoceros angustus ;k__viridiplantae;p__streptophyta;c__anthocerotopsida;o__anthocerotales;f__anthocerotaceae;g__anthoceros;s__anthoceros angustus;subclass anthocerotidae;superkingdom__eukaryota	78.7234	2.4024	38.2554			0	0	0	0	0	0	0	0	0	0	0	0	0	0	0	0	0	0	0	0	0	0	0	0	0	0	43	0	0	0	0	0	0	0	0	0	0	0	0	0	0	0	0
Zotu179	amaranthus tricolor ;k__viridiplantae;p__streptophyta;c__magnoliopsida;o__caryophyllales;f__amaranthaceae;g__amaranthus;s__amaranthus tricolor; subphylum__streptophytina;superkingdom__eukaryota;	92	3.45133	37.3537			0	0	0	0	9	0	0	0	0	0	0	0	0	0	0	30	0	0	0	0	0	0	0	0	0	0	0	0	0	0	0	0	0	0	0	0	0	0	0	0	0	0	0
Zotu180	___eu030147.1__gi:154431721_ ;k__fungi;p__basidiomycota;c__agaricomycetes;o__polyporales;f__polyporaceae;g__coriolopsis;s__coriolopsis caperata; subphylum__agaricomycotina;subkingdom__dikarya;superkingdom__eukaryota;	99.5169	5.58684e-100	370.075			0	0	0	0	0	0	0	0	0	34	0	0	0	0	0	0	0	0	0	0	0	0	0	0	0	0	0	0	0	0	0	0	0	0	0	0	0	0	0	0	0	0	0
Zotu181	___ab015696.1__gi:4630822_ ;k__fungi;p__basidiomycota;c__agaricomycetes;o__agaricales;f__amanitaceae;g__amanita;s__amanita flavipes;subclass agaricomycetidae;subkingdom__dikarya;superkingdom__eukaryota	93.5385	3.98318e-134	483.687			0	0	0	0	0	0	0	0	0	0	0	0	0	0	0	0	0	0	0	0	0	0	0	0	0	0	0	0	0	0	0	0	0	0	0	0	0	0	51	0	0	0	0
Zotu182	___hq533018.1__gi:314913962_ ;k__fungi;p__basidiomycota;c__agaricomycetes;o__hymenochaetales;f__hymenochaetaceae;g__hymenochaete;s__hymenochaete cinnamomea;subkingdom__dikarya;superkingdom__eukaryota	85.5191	4.26362e-109	399.831			0	0	0	0	0	0	0	0	0	0	0	0	0	0	0	0	0	0	0	0	0	0	0	0	0	0	0	1	0	2	0	3	0	0	0	0	0	9	0	3	8	0	0
Zotu183	___dq659348.1__gi:110520348_ ;k__fungi;p__ascomycota;c__saccharomycetes;o__saccharomycetales;f__pichiaceae;g__pichia;s__pichia fermentans;subphylum__saccharomycotina;subkingdom__dikarya;superkingdom__eukaryota	84.375	6.00822e-39	166.295			0	0	0	0	0	0	0	0	0	0	0	0	0	1	0	1	0	0	0	0	0	0	0	0	0	1	0	2	0	0	0	0	7	0	0	0	0	0	0	0	0	0	0
Zotu184	No hits found						0	1	0	13	13	0	0	14	4	0	8	0	0	17	0	0	0	0	0	0	0	0	0	0	0	0	0	0	0	0	0	0	0	0	0	0	0	0	0	0	0	0	0
Zotu185	xylaria longipes ;k__fungi;p__ascomycota;c__sordariomycetes;o__xylariales;f__xylariaceae;g__xylaria;s__xylaria longipes;subclass xylariomycetidae;subphylum__pezizomycotina;subkingdom__dikarya;superkingdom__eukaryota	80.5668	1.68641e-48	198.755			0	0	0	0	0	0	0	0	0	0	0	10	0	0	0	0	0	0	0	0	0	0	0	0	0	0	0	0	0	0	0	0	0	0	0	0	0	0	0	0	2	0	9
Zotu186	talaromyces radicus ;k__fungi;p__ascomycota;c__eurotiomycetes;o__eurotiales;f__trichocomaceae;g__talaromyces;s__talaromyces radicus;subclass eurotiomycetidae;subphylum__pezizomycotina;subkingdom__dikarya;superkingdom__eukaryota	99.6109	3.55901e-127	460.244			0	0	0	0	0	0	0	0	0	0	0	0	0	0	0	0	0	0	0	0	0	0	0	0	0	0	0	0	0	0	0	0	0	0	0	0	0	0	0	0	0	0	0
Zotu187	mythimna separata ;k__metazoa;p__arthropoda;c__insecta;o__lepidoptera;f__noctuidae;g__mythimna;s__mythimna separata;subfamily__hadeninae;superfamily__noctuoidea;parvorder__heteroneura;infraorder__neolepidoptera;suborder__glossata;superorder__amphiesmenoptera;infraclass endopterygota;subclass neoptera;superclass hexapoda;superkingdom__eukaryota	96.1538	0.10703	43.6655			0	0	0	8	0	1	9	0	34	2	2	0	0	8	1	0	43	0	0	0	0	0	0	0	0	0	0	0	0	0	0	0	0	0	0	0	0	0	0	0	0	0	0
Zotu188	___ab360356.1__gi:189332652_ ;k__fungi;p__ascomycota;c__sordariomycetes;o__hypocreales;f__cordycipitaceae;g__lecanicillium;s__lecanicillium kalimantanense;subclass hypocreomycetidae;subphylum__pezizomycotina;subkingdom__dikarya;superkingdom__eukaryota	100	1.39855e-119	434.095			0	0	0	0	0	0	0	0	0	0	0	0	1	0	0	0	0	0	0	0	0	0	0	0	0	0	0	0	0	0	0	0	0	0	0	0	1	0	24	0	0	0	0
Zotu189	culex nigripalpus ;k__metazoa;p__arthropoda;c__insecta;o__diptera;f__culicidae;g__culex;s__culex nigripalpus;subgenus culex;tribe__culicini;subfamily__culicinae;superfamily__culicoidea;infraorder__culicomorpha;suborder__nematocera;infraclass endopterygota;subclass neoptera;superclass hexapoda;superkingdom__eukaryota	97.7011	0	881.33			0	0	1	1	1	1	2	2	2	1	1	5	1	1	2	0	0	0	3	0	0	2	1	2	2	2	0	0	4	1	0	0	2	0	2	2	1	45	12	4	77	34	353
Zotu190	___dq411529.1__gi:89887360_ ;k__fungi;p__basidiomycota;c__agaricomycetes;o__trechisporales;f__hydnodontaceae;g__trechispora;s__trechispora alnicola; subphylum__agaricomycotina;subkingdom__dikarya;superkingdom__eukaryota;	85.4545	3.26586e-77	293.432			0	0	0	0	11	0	0	0	1	0	0	0	4	0	1	0	0	0	0	0	0	0	0	0	0	0	0	0	0	0	0	0	0	0	4	0	0	0	0	3	13	0	0
Zotu191	hypoxylon fendleri ;k__fungi;p__ascomycota;c__sordariomycetes;o__xylariales;f__hypoxylaceae;g__hypoxylon;s__hypoxylon fendleri; subclass xylariomycetidae;subphylum__pezizomycotina;subkingdom__dikarya;superkingdom__eukaryota;	95.5102	5.35688e-106	389.912			0	0	0	0	1	0	0	0	0	0	0	0	1	0	0	0	0	0	0	0	4	0	0	0	0	0	0	0	0	0	0	0	0	0	0	0	0	0	0	0	42	0	0
Zotu192	culex nigripalpus ;k__metazoa;p__arthropoda;c__insecta;o__diptera;f__culicidae;g__culex;s__culex nigripalpus;subgenus culex;tribe__culicini;subfamily__culicinae;superfamily__culicoidea;infraorder__culicomorpha;suborder__nematocera;infraclass endopterygota;subclass neoptera;superclass hexapoda;superkingdom__eukaryota	95.1923	0	829.934			0	1	1	0	0	0	0	0	1	1	0	0	0	0	1	1	0	0	0	0	0	0	0	0	0	0	0	0	0	1	1	0	0	1	0	0	0	11	30	14	61	4	9
Zotu193	culex pilosus ;k__metazoa;p__arthropoda;c__insecta;o__diptera;f__culicidae;g__culex;s__culex pilosus;subgenus mochlostyrax;tribe__culicini;subfamily__culicinae;superfamily__culicoidea;infraorder__culicomorpha;suborder__nematocera;infraclass endopterygota;subclass neoptera;superclass hexapoda;superkingdom__eukaryota	93.1507	6.42911e-20	104.078			1	0	0	1	0	272	1	0	0	0	0	1	0	1	1	0	1	0	0	0	0	0	0	1	0	0	0	0	0	0	1	0	0	0	0	0	0	1	0	0	0	0	0
Zotu194	No hits found						0	0	0	0	0	0	0	0	0	0	1	0	0	0	0	0	24	0	0	0	0	0	0	0	0	0	0	0	0	0	0	0	0	0	0	0	0	0	0	0	0	0	0
Zotu195	___eu232219.1__gi:166361546_ ;k__fungi;p__basidiomycota;c__agaricomycetes;o__polyporales;f__polyporaceae;g__ganoderma;s__ganoderma applanatum; superkingdom__bacteria;species__candidatus gloeomargarita;superkingdom__bacteria;strain__candidatus gloeomargarita;species__candidatus gloeomargarita;superkingdom__bacteria;species__candidatus gloeomargarita;subfamily__melolonthinae;superfamily__scarabaeoi…	92.4528	9.07932e-78	296.137			0	0	0	0	0	0	0	30	10	0	0	0	0	0	3	6	0	0	0	0	0	0	0	0	1	0	0	0	0	0	0	0	0	0	0	0	0	0	0	0	0	0	0
Zotu196	___aj301908.1__gi:17426612_ ;k__fungi;p__ascomycota;c__sordariomycetes;o__glomerellales;f__glomerellaceae;g__colletotrichum;s__glomerella cingulata;subclass hypocreomycetidae;subphylum__pezizomycotina;subkingdom__dikarya;superkingdom__eukaryota	99.1903	1.11197e-120	437.702			35	0	0	0	0	0	0	0	0	0	0	0	0	0	0	0	0	0	0	0	0	0	0	0	0	0	0	0	0	0	0	0	0	0	0	0	0	0	0	0	0	0	0
Zotu197	thorea hispida ;k__eukaryota;p__rhodophyta;c__florideophyceae;o__thoreales;f__thoreaceae;g__thorea;s__thorea hispida;superkingdom__eukaryota;subclass nemaliophycidae;	89.2857	3.45133	38.2554			1	0	0	0	0	0	0	1	0	0	0	0	1	0	1	27	3	0	0	0	0	0	0	0	0	0	0	0	0	0	0	0	0	0	0	0	0	0	0	0	0	0	0
Zotu198	culex nigripalpus ;k__metazoa;p__arthropoda;c__insecta;o__diptera;f__culicidae;g__culex;s__culex nigripalpus;subgenus culex;tribe__culicini;subfamily__culicinae;superfamily__culicoidea;infraorder__culicomorpha;suborder__nematocera;infraclass endopterygota;subclass neoptera;superclass hexapoda;superkingdom__eukaryota	95.3578	0	829.033			7	1	1	1	1	1	3	2	0	0	2	2	1	2	1	6	1	0	1	0	0	1	1	1	1	1	3	0	0	2	1	1	2	0	0	0	1	89	28	1531	457	12	10
Zotu199	No hits found						0	0	0	0	0	0	0	0	0	0	0	0	0	0	0	0	25	0	0	0	0	0	0	0	0	0	0	0	0	0	0	0	0	0	0	0	0	0	0	0	0	0	0
Zotu200	___fj481022.1__gi:218664615_ ;k__fungi;p__basidiomycota;c__agaricomycetes;o__hymenochaetales;f__hymenochaetaceae;g__pseudochaete;s__pseudochaete tabacina;subkingdom__dikarya;superkingdom__eukaryota	84.0731	2.81294e-105	387.207			0	0	0	0	0	0	0	0	0	0	0	0	0	0	0	0	0	0	0	0	0	0	0	0	0	0	0	0	0	0	0	0	0	0	0	0	0	0	0	0	0	0	0
Zotu201	fuscoporia ferruginosa ;k__fungi;p__basidiomycota;c__agaricomycetes;o__hymenochaetales;f__hymenochaetaceae;g__fuscoporia;s__fuscoporia ferruginosa;subkingdom__dikarya;superkingdom__eukaryota	100	5.31923e-119	432.291			0	0	0	0	0	1	0	0	0	0	0	0	0	0	0	0	0	0	0	0	0	0	0	0	0	0	0	0	1	0	0	1	1	0	0	0	0	29	3	0	13	0	0
Zotu202	___gq409535.1__gi:299483230_ ;k__fungi;p__basidiomycota;c__agaricomycetes;o__polyporales;f__hyphodermataceae;g__hyphoderma;s__hyphoderma puberum; subphylum__agaricomycotina;subkingdom__dikarya;superkingdom__eukaryota;	85.0534	2.41498e-79	301.547			0	0	0	0	0	0	0	0	0	0	0	0	0	20	0	0	0	0	0	0	0	0	0	0	0	0	0	0	0	0	0	0	0	0	0	1	0	0	0	0	0	0	0
Zotu203	culex pilosus ;k__metazoa;p__arthropoda;c__insecta;o__diptera;f__culicidae;g__culex;s__culex pilosus;subgenus mochlostyrax;tribe__culicini;subfamily__culicinae;superfamily__culicoidea;infraorder__culicomorpha;suborder__nematocera;infraclass endopterygota;subclass neoptera;superclass hexapoda;superkingdom__eukaryota	93.1507	5.88874e-20	104.078			0	1	89	0	0	0	0	0	0	0	0	0	0	0	0	0	0	0	0	0	0	0	0	0	0	0	0	0	0	0	0	0	0	0	0	0	0	0	0	0	0	0	0
Zotu204	culex nigripalpus ;k__metazoa;p__arthropoda;c__insecta;o__diptera;f__culicidae;g__culex;s__culex nigripalpus;subgenus culex;tribe__culicini;subfamily__culicinae;superfamily__culicoidea;infraorder__culicomorpha;suborder__nematocera;infraclass endopterygota;subclass neoptera;superclass hexapoda;superkingdom__eukaryota	96.7308	0	860.592			2	3	1	1	0	1	2	0	1	1	0	0	2	0	1	2	1	0	0	2	0	1	0	0	0	0	1	0	0	1	0	0	1	1	0	0	0	410	118	477	39	3	4
Zotu205	___jf908384.1__gi:344333341_ ;k__fungi;p__basidiomycota;c__agaricomycetes;o__agaricales;f__mycenaceae;g__mycena;s__mycena acicula; subclass agaricomycetidae;subphylum__agaricomycotina;subkingdom__dikarya;superkingdom__eukaryota;	88.4106	3.94153e-102	376.387			0	0	0	0	0	0	0	0	0	0	0	0	0	0	0	0	0	0	0	0	0	0	0	0	0	0	0	0	0	0	0	0	0	0	0	0	0	0	0	0	0	0	0
Zotu206	___gu207282.1__gi:288887199_ ;k__fungi;p__basidiomycota;c__agaricomycetes;o__polyporales;f__polyporaceae;g__lentinus;s__lentinus crinitus; subphylum__agaricomycotina;subkingdom__dikarya;superkingdom__eukaryota;	100	8.76385e-136	488.196			0	0	0	0	1	0	0	0	0	0	0	0	0	0	0	0	0	0	0	0	0	0	0	0	0	0	0	2	0	0	0	0	0	0	0	0	0	0	7	0	0	0	0
Zotu207	___ay216474.1__gi:29373923_ ;k__fungi;p__basidiomycota;c__agaricomycetes;o__agaricales;f__physalacriaceae;g__oudemansiella;s__oudemansiella canarii;subclass agaricomycetidae;subkingdom__dikarya;superkingdom__eukaryota	97.4453	3.88971e-127	460.244			0	0	0	0	0	0	0	0	0	0	0	0	2	0	0	0	0	0	0	0	0	0	7	0	0	0	0	0	0	0	0	0	0	0	0	0	0	0	0	0	24	0	0
Zotu208	___af210819.1__gi:6563323_ ;k__fungi;p__basidiomycota;c__agaricomycetes;o__russulales;f__peniophoraceae;g__peniophora;s__peniophora aurantiaca;subkingdom__dikarya;superkingdom__eukaryota	91.9414	1.96771e-105	387.207			0	0	0	0	0	0	0	0	0	0	0	0	0	0	0	0	6	0	0	0	2	0	0	0	0	0	0	0	0	0	0	1	0	0	6	0	0	10	0	0	10	0	0
Zotu209	___hq607954.1__gi:312434432_ ;k__fungi;p__basidiomycota;c__agaricomycetes;o__polyporales;f__meruliaceae;g__phlebia;s__phlebia subserialis; subphylum__agaricomycotina;subkingdom__dikarya;superkingdom__eukaryota;	86.1702	3.04421e-84	316.876			0	0	0	0	0	0	0	0	0	0	0	0	0	0	0	0	0	0	0	0	0	0	0	0	0	0	0	0	7	0	5	1	0	0	0	0	0	0	0	0	0	0	0
Zotu210	rigidoporus crocatus ;k__fungi;p__basidiomycota;c__agaricomycetes;o__polyporales;f__meripilaceae;g__rigidoporus;s__rigidoporus crocatus; subphylum__agaricomycotina;subkingdom__dikarya;superkingdom__eukaryota;	82.6087	9.0606e-72	275.398			0	0	0	0	0	0	0	0	0	0	0	0	0	0	0	0	0	0	0	0	0	0	0	0	0	0	0	0	0	0	0	0	0	0	0	0	0	12	27	0	0	0	0
Zotu211	culex nigripalpus ;k__metazoa;p__arthropoda;c__insecta;o__diptera;f__culicidae;g__culex;s__culex nigripalpus;subgenus culex;tribe__culicini;subfamily__culicinae;superfamily__culicoidea;infraorder__culicomorpha;suborder__nematocera;infraclass endopterygota;subclass neoptera;superclass hexapoda;superkingdom__eukaryota	96.8689	0	858.788			0	0	0	0	0	0	0	0	0	0	0	1	0	0	0	0	0	0	0	0	0	0	0	0	0	0	0	0	0	0	0	0	0	0	0	0	0	1	1	2	0	3	0
Zotu212	culex pilosus ;k__metazoa;p__arthropoda;c__insecta;o__diptera;f__culicidae;g__culex;s__culex pilosus;subgenus mochlostyrax;tribe__culicini;subfamily__culicinae;superfamily__culicoidea;infraorder__culicomorpha;suborder__nematocera;infraclass endopterygota;subclass neoptera;superclass hexapoda;superkingdom__eukaryota	93.1507	5.47306e-20	104.078			0	0	0	0	21	0	0	0	0	0	0	0	1	0	0	17	0	0	0	0	0	0	0	0	0	0	0	0	0	0	0	0	0	0	0	0	0	0	0	0	0	0	0
Zotu213	culex nigripalpus ;k__metazoa;p__arthropoda;c__insecta;o__diptera;f__culicidae;g__culex;s__culex nigripalpus;subgenus culex;tribe__culicini;subfamily__culicinae;superfamily__culicoidea;infraorder__culicomorpha;suborder__nematocera;infraclass endopterygota;subclass neoptera;superclass hexapoda;superkingdom__eukaryota	96.332	0	837.148			0	0	0	0	1	0	1	0	1	0	0	0	1	1	1	0	1	0	3	1	0	0	1	1	0	0	0	0	3	0	0	0	0	0	0	0	1	2	25	219	16	14	9
Zotu214	___ay571031.1__gi:50346928_ ;k__fungi;p__basidiomycota;c__agaricomycetes;o__agaricales;f__tricholomataceae;g__calyptella;s__calyptella capula;subclass agaricomycetidae;subkingdom__dikarya;superkingdom__eukaryota	82.0339	5.19363e-69	267.283			0	0	0	0	0	0	0	0	0	0	0	0	0	0	0	0	0	0	0	0	0	0	0	0	0	0	0	0	1	0	0	0	0	0	0	0	0	0	0	30	0	0	0
Zotu215	___hq607954.1__gi:312434432_ ;k__fungi;p__basidiomycota;c__agaricomycetes;o__polyporales;f__meruliaceae;g__phlebia;s__phlebia subserialis; subphylum__agaricomycotina;subkingdom__dikarya;superkingdom__eukaryota;	99.631	9.49027e-135	485.491			0	0	0	0	0	0	0	0	0	0	0	0	0	0	0	1	0	0	0	0	0	0	0	0	0	0	0	3	0	2	0	0	0	0	0	0	0	0	0	0	8	0	0
Zotu216	culex nigripalpus ;k__metazoa;p__arthropoda;c__insecta;o__diptera;f__culicidae;g__culex;s__culex nigripalpus;subgenus culex;tribe__culicini;subfamily__culicinae;superfamily__culicoidea;infraorder__culicomorpha;suborder__nematocera;infraclass endopterygota;subclass neoptera;superclass hexapoda;superkingdom__eukaryota	94.8276	0	821.819			0	1	2	0	2	0	3	2	2	2	0	2	2	2	0	1	0	2	1	0	0	1	1	1	1	2	0	2	3	1	2	1	1	1	0	1	1	34	7	5	36	9	82
Zotu217	___jn164922.1__gi:357216417_ ;k__fungi;p__basidiomycota;c__agaricomycetes;o__polyporales;f__polyporaceae;g__trametes;s__trametes cubensis; subphylum__agaricomycotina;subkingdom__dikarya;superkingdom__eukaryota;	100	5.3364e-138	495.409			0	0	0	0	0	0	0	0	0	0	0	0	0	0	0	0	0	0	0	0	0	0	0	0	1	0	0	0	0	0	0	0	0	32	0	0	0	0	0	0	0	0	0
Zotu218	___fj487920.1__gi:218938069_ ;k__fungi;p__ascomycota;c__sordariomycetes;o__diaporthales;f__valsaceae;g__valsa;s__valsa brevispora;subclass sordariomycetidae;subphylum__pezizomycotina;subkingdom__dikarya;superkingdom__eukaryota	95.9259	1.79547e-118	430.488			0	0	0	1	0	0	0	0	0	0	0	5	0	0	0	0	0	0	0	0	0	0	0	4	0	0	0	0	0	0	0	0	0	0	3	0	0	0	0	0	0	0	1
Zotu219	___hq607954.1__gi:312434432_ ;k__fungi;p__basidiomycota;c__agaricomycetes;o__polyporales;f__meruliaceae;g__phlebia;s__phlebia subserialis; subphylum__agaricomycotina;subkingdom__dikarya;superkingdom__eukaryota;	76.2987	1.29077e-57	229.412			0	0	0	0	0	0	0	0	0	0	0	0	0	0	0	0	0	0	0	5	0	0	0	8	0	0	0	0	0	0	0	0	0	0	0	0	0	0	0	0	0	10	0
Zotu220	___fj478095.1__gi:218454071_ ;k__fungi;p__basidiomycota;c__agaricomycetes;o__agaricales;f__psathyrellaceae;g__psathyrella;s__psathyrella artemisiae;subclass agaricomycetidae;subkingdom__dikarya;superkingdom__eukaryota	100	5.02223e-158	562.134			0	0	0	0	0	0	0	0	0	0	0	0	0	0	0	0	0	0	0	0	0	0	0	0	0	0	0	0	0	0	0	0	0	0	0	0	0	0	0	0	0	0	0
Zotu221	___fj903297.1__gi:237641516_ ;k__fungi;p__basidiomycota;c__agaricomycetes;o__corticiales;f__corticiaceae;g__sistotrema;s__sistotrema brinkmannii;subkingdom__dikarya;superkingdom__eukaryota	86.7188	3.54458e-33	147.359			0	0	0	0	0	0	0	0	0	0	0	0	0	0	0	0	0	0	0	0	0	0	0	0	0	0	0	0	0	0	0	0	0	0	0	0	0	0	0	0	19	0	0
Zotu222	___af210819.1__gi:6563323_ ;k__fungi;p__basidiomycota;c__agaricomycetes;o__russulales;f__peniophoraceae;g__peniophora;s__peniophora aurantiaca;subkingdom__dikarya;superkingdom__eukaryota	91.4498	1.23146e-101	375.485			0	0	0	0	0	0	0	0	0	0	0	0	0	0	0	0	0	0	0	0	0	0	0	0	0	0	0	0	0	0	0	0	0	0	0	0	0	0	0	0	0	0	0
Zotu223	jatropha curcas ;k__viridiplantae;p__streptophyta;c__magnoliopsida;o__malpighiales;f__euphorbiaceae;g__jatropha;s__jatropha curcas; tribe__jatropheae;subfamily__crotonoideae;subphylum__streptophytina;superkingdom__eukaryota;	86.1111	2.14431	40.0587			0	0	0	0	0	0	0	64	0	0	0	0	0	0	0	0	0	0	0	0	0	0	0	0	0	0	0	0	0	0	0	0	0	0	0	0	0	0	0	0	0	0	0
Zotu224	___af237731.2__gi:13699894_ ;k__fungi;p__basidiomycota;c__agaricomycetes;o__hymenochaetales;f__hymenochaetaceae;g__inocutis;s__inocutis rheades;subkingdom__dikarya;superkingdom__eukaryota	82.2823	2.81201e-79	300.646			0	0	0	0	0	0	0	0	0	0	0	0	0	0	0	0	0	0	0	0	0	0	0	0	0	0	0	0	0	0	0	0	0	0	0	0	0	0	0	0	0	0	0
Zotu225	culex nigripalpus ;k__metazoa;p__arthropoda;c__insecta;o__diptera;f__culicidae;g__culex;s__culex nigripalpus;subgenus culex;tribe__culicini;subfamily__culicinae;superfamily__culicoidea;infraorder__culicomorpha;suborder__nematocera;infraclass endopterygota;subclass neoptera;superclass hexapoda;superkingdom__eukaryota	99.2233	0	911.988			1	1	2	0	1	3	1	1	0	0	2	2	2	3	2	0	0	1	3	0	1	0	0	0	1	0	1	3	1	0	0	1	0	0	0	0	0	70	1070	3	22	7	58
Zotu226	___aj560679.1__gi:46559598_ ;k__fungi;p__ascomycota;c__sordariomycetes;o__hypocreales;f__cordycipitaceae;g__beauveria;s__cordyceps bassiana;subclass hypocreomycetidae;subphylum__pezizomycotina;subkingdom__dikarya;superkingdom__eukaryota	100	5.49346e-118	428.685			0	0	0	0	0	0	0	0	0	0	0	29	0	0	0	0	0	0	0	0	1	0	0	0	0	0	0	0	0	0	0	0	0	0	0	0	0	0	0	0	0	0	0
Zotu227	culex nigripalpus ;k__metazoa;p__arthropoda;c__insecta;o__diptera;f__culicidae;g__culex;s__culex nigripalpus;subgenus culex;tribe__culicini;subfamily__culicinae;superfamily__culicoidea;infraorder__culicomorpha;suborder__nematocera;infraclass endopterygota;subclass neoptera;superclass hexapoda;superkingdom__eukaryota	94.7776	0	808.294			0	0	0	0	0	0	0	0	0	0	0	0	0	0	0	0	0	0	0	0	0	0	0	0	0	0	0	0	0	0	0	0	0	0	0	0	0	0	1	0	0	0	0
Zotu228	___am269796.1__gi:158934585_ ;k__fungi;p__basidiomycota;c__agaricomycetes;o__hymenochaetales;f__hymenochaetaceae;g__fuscoporia;s__fuscoporia gilva;subkingdom__dikarya;superkingdom__eukaryota	98.3923	2.42791e-149	533.28			4	0	0	0	0	0	0	0	0	0	0	26	0	0	0	0	0	0	0	0	1	0	2	0	0	0	0	4	2	0	0	0	0	0	0	0	0	0	5	3	0	0	0
Zotu229	___gu187509.1__gi:300394313_ ;k__fungi;p__basidiomycota;c__agaricomycetes;o__agaricales;f__radulomycetaceae;g__aphanobasidium;s__aphanobasidium pseudotsugae; subclass agaricomycetidae;subphylum__agaricomycotina;subkingdom__dikarya;superkingdom__eukaryota;	82.0122	8.79681e-73	279.005			0	0	0	0	0	0	0	0	0	0	0	0	0	0	0	0	0	0	0	0	0	0	0	0	0	0	0	0	0	0	0	0	0	0	0	0	0	0	0	8	26	0	0
Zotu230	___ay558595.1__gi:46810526_ ;k__fungi;p__basidiomycota;c__agaricomycetes;o__hymenochaetales;f__hymenochaetaceae;g__hymenochaete;s__hymenochaete denticulata;subkingdom__dikarya;superkingdom__eukaryota	90.6667	1.91479e-18	98.6682			0	0	0	0	0	0	0	0	0	0	0	0	0	0	0	0	0	0	0	0	0	0	0	0	0	0	0	0	0	0	0	0	0	0	0	0	0	0	0	0	0	0	30
Zotu231	___af210819.1__gi:6563323_ ;k__fungi;p__basidiomycota;c__agaricomycetes;o__russulales;f__peniophoraceae;g__peniophora;s__peniophora aurantiaca;subkingdom__dikarya;superkingdom__eukaryota	91.5751	8.36693e-104	382.699			0	0	0	0	0	0	0	0	0	0	0	0	0	0	0	0	0	0	0	0	0	0	0	0	0	0	0	0	0	0	0	0	0	0	0	0	0	0	0	0	0	0	0
Zotu232	sidera vulgaris ;k__fungi;p__basidiomycota;c__agaricomycetes;o__hymenochaetales;f__rickenellaceae;g__sidera;s__sidera vulgaris;subkingdom__dikarya;superkingdom__eukaryota	92.2535	7.45769e-48	196.952			0	0	0	0	0	0	0	0	11	0	0	0	0	0	0	0	0	0	0	0	0	0	0	0	14	0	0	1	0	0	0	0	0	0	0	0	0	0	0	0	0	0	0
Zotu233	culex nigripalpus ;k__metazoa;p__arthropoda;c__insecta;o__diptera;f__culicidae;g__culex;s__culex nigripalpus;subgenus culex;tribe__culicini;subfamily__culicinae;superfamily__culicoidea;infraorder__culicomorpha;suborder__nematocera;infraclass endopterygota;subclass neoptera;superclass hexapoda;superkingdom__eukaryota	97.4855	0	866.903			0	0	0	0	0	2	0	0	0	0	1	0	0	0	0	0	0	0	0	1	0	0	0	0	0	0	0	0	0	1	0	1	0	0	0	0	2	9	144	18	5	18	52
Zotu234	ischnosiphon hirsutus ;k__viridiplantae;p__streptophyta;c__magnoliopsida;o__zingiberales;f__marantaceae;g__ischnosiphon;s__ischnosiphon hirsutus; subclass petrosaviidae;subphylum__streptophytina;superkingdom__eukaryota;	100	3.2329e-20	104.078			0	0	0	0	0	0	0	0	0	0	0	0	0	0	0	0	0	0	0	0	0	0	0	0	0	0	0	0	0	0	0	0	0	0	0	0	0	0	0	0	20	0	0
Zotu235	culex nigripalpus ;k__metazoa;p__arthropoda;c__insecta;o__diptera;f__culicidae;g__culex;s__culex nigripalpus;subgenus culex;tribe__culicini;subfamily__culicinae;superfamily__culicoidea;infraorder__culicomorpha;suborder__nematocera;infraclass endopterygota;subclass neoptera;superclass hexapoda;superkingdom__eukaryota	98.6381	0	890.347			4	3	4	3	5	4	2	2	4	3	2	0	5	3	3	3	1	4	0	1	4	3	3	1	3	1	3	1	2	2	1	1	1	1	0	2	2	8	25	59	1460	4	213
Zotu236	___ay239214.1__gi:33694303_ ;k__fungi;p__ascomycota;c__taphrinomycetes;o__taphrinales;f__taphrinaceae;g__lalaria;s__lalaria inositophila;subphylum__taphrinomycotina;subkingdom__dikarya;superkingdom__eukaryota	99.5283	9.13564e-103	379.092			0	0	0	0	0	0	0	0	0	0	0	0	0	0	0	0	0	0	0	0	0	0	0	0	0	0	0	0	0	0	0	0	3	0	0	0	0	0	1	0	0	0	0
Zotu237	___ef175526.1__gi:140260217_ ;k__fungi;p__basidiomycota;c__agaricomycetes;o__agaricales;f__marasmiaceae;g__tetrapyrgos;s__tetrapyrgos subcinerea;subclass agaricomycetidae;subkingdom__dikarya;superkingdom__eukaryota	95.4704	2.54412e-123	446.718			0	0	0	0	0	0	0	0	0	0	0	0	0	0	0	27	0	0	0	0	0	0	0	0	0	0	0	0	0	0	0	0	0	0	0	0	0	0	0	0	0	11	0
Zotu238	___dq490627.1__gi:94962114_ ;k__fungi;p__basidiomycota;c__agaricomycetes;o__agaricales;f__porotheleaceae;g__hydropus;s__hydropus marginellus;superkingdom__eukaryota;subkingdom__dikarya;subphylum__agaricomycotina;subclass agaricomycetidae;	80.1802	5.3536e-76	289.825			0	0	0	0	0	0	0	36	0	0	0	0	0	0	0	0	0	0	1	0	0	0	0	0	2	0	0	0	0	0	0	0	0	0	0	0	0	0	0	0	0	0	0
Zotu239	sidera vulgaris ;k__fungi;p__basidiomycota;c__agaricomycetes;o__hymenochaetales;f__rickenellaceae;g__sidera;s__sidera vulgaris;subkingdom__dikarya;superkingdom__eukaryota	92.2535	7.45769e-48	196.952			0	0	0	0	1	0	0	0	0	0	0	20	0	0	0	0	0	0	0	0	0	0	0	0	0	11	0	0	2	0	0	0	0	0	0	0	0	0	0	0	1	0	0
Zotu240	___ay916686.1__gi:64475669_ ;k__fungi;p__basidiomycota;c__agaricomycetes;o__agaricales;f__marasmiaceae;g__chaetocalathus;s__chaetocalathus columellifer;subclass agaricomycetidae;subkingdom__dikarya;superkingdom__eukaryota	92.7481	5.4992e-100	370.075			0	0	0	0	0	0	0	23	0	0	0	0	0	0	0	0	0	0	0	0	0	0	0	0	0	0	0	0	0	0	0	0	0	0	0	0	0	5	0	0	0	0	0
Zotu241	engyodontium album ;k__fungi;p__ascomycota;c__ascomycota;o__ascomycota;f__ascomycota;g__engyodontium;s__engyodontium album;superkingdom__eukaryota;subkingdom__dikarya	100	4.23984e-126	455.735			0	0	0	0	0	0	0	0	0	0	0	0	0	0	0	0	0	0	0	0	0	0	0	1	0	0	0	0	0	0	0	0	0	0	0	0	0	0	0	1	0	0	0
Zotu242	neonothopanus nambi ;k__fungi;p__basidiomycota;c__agaricomycetes;o__agaricales;f__omphalotaceae;g__neonothopanus;s__neonothopanus nambi; subclass agaricomycetidae;subphylum__agaricomycotina;subkingdom__dikarya;superkingdom__eukaryota;	96.8454	2.7901e-142	510.738			0	0	0	0	0	0	0	0	0	1	0	0	0	0	0	0	0	0	0	0	0	0	0	0	0	0	0	0	0	0	0	0	0	0	0	0	0	0	0	0	0	0	0
Zotu243	neonothopanus nambi ;k__fungi;p__basidiomycota;c__agaricomycetes;o__agaricales;f__omphalotaceae;g__neonothopanus;s__neonothopanus nambi; subclass agaricomycetidae;subphylum__agaricomycotina;subkingdom__dikarya;superkingdom__eukaryota;	97.1609	6.56169e-144	515.246			0	0	0	0	0	0	0	0	0	0	0	0	0	0	0	0	0	0	0	0	0	0	0	0	0	0	0	0	0	0	0	0	0	0	0	0	0	20	0	0	0	0	0
Zotu244	___af200240.1__gi:6470316_ ;k__fungi;p__basidiomycota;c__agaricomycetes;o__hymenochaetales;f__hymenochaetaceae;g__phellinus;s__phellinus tremulae;subkingdom__dikarya;superkingdom__eukaryota	99.1968	1.2767e-120	437.702			14	0	0	0	0	0	0	0	3	0	0	0	0	0	0	0	0	0	0	0	1	0	3	0	4	0	0	0	0	0	4	0	0	0	0	1	0	0	0	0	36	10	0
Zotu245	___hq599594.1__gi:313800033_ ;k__fungi;p__ascomycota;c__dothideomycetes;o__mycosphaerellales;f__teratosphaeriaceae;g__phaeothecoidea;s__phaeothecoidea melaleuca; subclass dothideomycetidae;subphylum__pezizomycotina;subkingdom__dikarya;superkingdom__eukaryota;	85.8407	2.36711e-65	254.66			0	0	0	0	0	0	0	0	0	0	0	0	0	0	0	1	0	0	0	0	0	0	0	0	0	0	0	0	0	0	0	0	4	0	15	0	0	0	0	0	0	0	0
Zotu246	___ay571061.1__gi:50346958_ ;k__fungi;p__basidiomycota;c__agaricomycetes;o__agaricales;f__tricholomataceae;g__resupinatus;s__resupinatus conspersus;subclass agaricomycetidae;subkingdom__dikarya;superkingdom__eukaryota	86.194	7.64803e-79	299.744			0	0	0	0	0	0	0	0	0	0	0	0	0	0	0	15	0	0	0	0	0	0	0	0	0	0	0	0	0	0	1	0	0	0	0	0	0	0	0	0	0	0	0
Zotu247	___ab361644.1__gi:157678733_ ;k__fungi;p__basidiomycota;c__agaricomycetes;o__polyporales;f__phanerochaetaceae;g__phanerochaete;s__phanerochaete chrysosporium;subkingdom__dikarya;superkingdom__eukaryota	100	2.69635e-135	486.393			0	0	0	0	0	0	0	0	0	0	0	0	0	0	0	0	0	0	0	0	0	0	0	0	0	0	0	9	0	3	0	4	0	0	0	0	0	0	0	0	0	0	0
Zotu248	___fj882040.1__gi:269969917_ ;k__fungi;p__basidiomycota;c__agaricomycetes;o__russulales;f__peniophoraceae;g__peniophora;s__peniophora laxitexta;subkingdom__dikarya;superkingdom__eukaryota	98.6547	5.63759e-106	389.912			0	0	0	0	0	0	0	0	0	0	0	0	0	0	0	0	0	0	0	0	0	0	0	0	0	0	0	0	0	0	0	0	0	0	0	0	0	0	0	0	0	0	0
Zotu249	mythimna separata ;k__metazoa;p__arthropoda;c__insecta;o__lepidoptera;f__noctuidae;g__mythimna;s__mythimna separata;subfamily__hadeninae;superfamily__noctuoidea;parvorder__heteroneura;infraorder__neolepidoptera;suborder__glossata;superorder__amphiesmenoptera;infraclass endopterygota;subclass neoptera;superclass hexapoda;superkingdom__eukaryota	95.6522	4.50027	38.2554			0	0	2	0	5	0	0	0	37	1	12	0	0	0	5	7	8	0	0	0	0	0	0	0	0	0	0	0	0	0	0	0	0	0	0	0	0	0	0	0	0	0	0
Zotu250	culex nigripalpus ;k__metazoa;p__arthropoda;c__insecta;o__diptera;f__culicidae;g__culex;s__culex nigripalpus;subgenus culex;tribe__culicini;subfamily__culicinae;superfamily__culicoidea;infraorder__culicomorpha;suborder__nematocera;infraclass endopterygota;subclass neoptera;superclass hexapoda;superkingdom__eukaryota	93.2171	0	776.735			0	0	0	0	1	0	0	0	1	0	0	0	0	0	0	0	0	0	0	0	0	0	0	0	0	0	0	0	1	0	0	0	0	0	0	0	0	3	6	61	1	0	1
Zotu251	___jf951150.1__gi:338809112_ ;k__fungi;p__ascomycota;c__dothideomycetes;o__capnodiales;f__capnodiaceae;g__leptoxyphium;s__leptoxyphium kurandae;subclass dothideomycetidae;subphylum__pezizomycotina;subkingdom__dikarya;superkingdom__eukaryota	100	2.03907e-110	403.438			0	0	0	0	0	0	0	0	0	0	0	0	0	0	0	0	27	0	0	0	0	0	0	0	0	0	0	0	0	0	0	0	0	0	0	0	0	0	0	0	0	0	0
Zotu252	___gu222266.1__gi:281376773_ ;k__fungi;p__basidiomycota;c__agaricomycetes;o__polyporales;f__grifolaceae;g__grifola;s__grifola sordulenta; subphylum__agaricomycotina;subkingdom__dikarya;superkingdom__eukaryota;	84.8708	4.84697e-75	287.12			0	0	0	0	0	0	0	0	17	0	0	0	0	0	0	0	0	0	0	0	0	0	0	0	0	0	0	0	0	0	0	0	0	0	0	0	0	0	0	0	0	0	0
Zotu253	___ab041236.1__gi:13661066_ ;k__fungi;p__ascomycota;c__dothideomycetes;o__botryosphaeriales;f__phyllostictaceae;g__phyllosticta;s__guignardia mangiferae;subphylum__pezizomycotina;subkingdom__dikarya;superkingdom__eukaryota	99.6732	1.08647e-153	548.609			0	0	0	0	0	0	0	0	0	0	0	0	0	0	1	0	0	0	0	0	0	0	0	0	0	0	0	0	0	0	0	0	0	0	0	0	0	0	0	0	0	0	0
Zotu254	culex nigripalpus ;k__metazoa;p__arthropoda;c__insecta;o__diptera;f__culicidae;g__culex;s__culex nigripalpus;subgenus culex;tribe__culicini;subfamily__culicinae;superfamily__culicoidea;infraorder__culicomorpha;suborder__nematocera;infraclass endopterygota;subclass neoptera;superclass hexapoda;superkingdom__eukaryota	96.7118	0	847.968			0	0	0	1	0	0	3	0	0	0	0	2	0	0	0	0	0	1	0	0	0	0	0	0	0	0	0	0	0	1	0	0	1	0	1	1	0	7	5	8	1	30	5
Zotu255	___hq270178.1__gi:307948750_ ;k__fungi;p__basidiomycota;c__agaricomycetes;o__corticiales;f__corticiaceae;g__waitea;s__waitea circinata; subphylum__agaricomycotina;subkingdom__dikarya;superkingdom__eukaryota;subphylum__agaricomycotina;subkingdom__dikarya;superkingdom__eukaryota;subphylum__agaricomycotina;subkingdom__dikarya;superkingdom__eukaryota;subphylum__agaricomycotina;subkingdom__dikarya;sup…	100	8.27697e-136	488.196			0	0	0	0	0	0	0	0	27	0	0	0	0	0	0	0	0	0	0	0	0	0	0	0	0	0	0	0	0	0	0	0	0	0	0	0	0	0	0	0	0	0	0
Zotu256	amaranthus tricolor ;k__viridiplantae;p__streptophyta;c__magnoliopsida;o__caryophyllales;f__amaranthaceae;g__amaranthus;s__amaranthus tricolor; subphylum__streptophytina;superkingdom__eukaryota;	92	3.45133	37.3537			0	0	0	0	0	0	0	0	0	0	0	0	2	0	0	0	21	0	0	0	0	0	0	0	0	0	0	0	0	0	0	0	0	0	0	0	0	0	0	0	0	0	0
Zotu257	___ef429238.1__gi:149208235_ ;k__fungi;p__basidiomycota;c__agaricomycetes;o__hymenochaetales;f__hymenochaetaceae;g__phellinus;s__phellinus punctatus;subkingdom__dikarya;superkingdom__eukaryota	100	2.46396e-162	576.561			0	0	0	0	1	0	0	0	0	0	0	0	0	0	0	0	0	0	0	0	0	0	0	0	0	0	0	0	0	0	0	0	0	0	0	0	0	0	15	4	0	0	0
Zotu258	___eu232219.1__gi:166361546_ ;k__fungi;p__basidiomycota;c__agaricomycetes;o__polyporales;f__polyporaceae;g__ganoderma;s__ganoderma applanatum; superkingdom__bacteria;species__candidatus gloeomargarita;superkingdom__bacteria;strain__candidatus gloeomargarita;species__candidatus gloeomargarita;superkingdom__bacteria;species__candidatus gloeomargarita;subfamily__melolonthinae;superfamily__scarabaeoi…	91.9431	3.15516e-77	293.432			0	0	0	0	0	0	0	0	0	0	0	0	0	0	0	0	0	0	0	0	0	0	0	0	0	0	0	0	0	0	0	0	0	0	0	0	0	0	0	0	17	0	0
Zotu259	vaucheria litorea ;k__eukaryota;p__xanthophyceae;c__xanthophyceae;o__vaucheriales;f__vaucheriaceae;g__vaucheria;s__vaucheria litorea;superkingdom__eukaryota	98.3333	3.3439e-20	104.98			0	0	0	0	0	0	0	0	0	0	0	0	0	0	0	0	0	0	0	0	0	0	0	0	0	0	0	0	0	0	0	0	0	0	0	0	0	0	0	0	0	0	0
Zotu260	___u66455.1__gi:2289063_ ;k__fungi;p__basidiomycota;c__agaricomycetes;o__agaricales;f__hygrophoraceae;g__arrhenia;s__arrhenia velutipes;superkingdom__eukaryota;subkingdom__dikarya;subphylum__agaricomycotina;subclass agaricomycetidae;	75.5474	4.79382e-37	159.983			0	0	0	0	19	0	0	0	0	0	0	0	0	0	0	0	0	0	0	0	0	0	0	0	0	0	0	0	0	0	0	0	0	0	0	0	0	0	0	0	0	0	0
Zotu261	___dq911612.1__gi:115291780_ ;k__fungi;p__basidiomycota;c__agaricomycetes;o__corticiales;f__corticiaceae;g__haplotrichum;s__haplotrichum conspersum;subkingdom__dikarya;superkingdom__eukaryota	83.0769	4.98657e-43	179.82			0	0	0	0	0	0	0	0	0	0	0	0	0	0	0	0	0	0	0	0	0	0	0	0	0	0	0	0	0	0	0	0	0	0	0	0	0	0	0	0	0	0	0
Zotu262	___ab306311.1__gi:166197408_ ;k__fungi;p__basidiomycota;c__agaricomycetes;o__agaricales;f__psathyrellaceae;g__psathyrella;s__psathyrella candolleana;subclass agaricomycetidae;subkingdom__dikarya;superkingdom__eukaryota	97.8659	4.35202e-159	566.642			0	0	0	0	0	0	0	0	0	0	0	0	0	0	0	0	0	0	0	0	0	0	0	0	0	0	0	0	0	0	0	0	0	0	0	0	0	0	0	0	0	0	0
Zotu263	hyphoderma obtusiforme ;k__fungi;p__basidiomycota;c__agaricomycetes;o__polyporales;f__hyphodermataceae;g__hyphoderma;s__hyphoderma obtusiforme; subphylum__agaricomycotina;subkingdom__dikarya;superkingdom__eukaryota;	79.5053	3.29645e-58	231.216			0	0	1	0	0	0	0	0	0	0	0	0	0	0	0	1	0	0	0	0	0	0	0	0	0	0	0	0	0	0	0	0	3	0	1	0	0	0	0	0	0	0	0
Zotu264	culex nigripalpus ;k__metazoa;p__arthropoda;c__insecta;o__diptera;f__culicidae;g__culex;s__culex nigripalpus;subgenus culex;tribe__culicini;subfamily__culicinae;superfamily__culicoidea;infraorder__culicomorpha;suborder__nematocera;infraclass endopterygota;subclass neoptera;superclass hexapoda;superkingdom__eukaryota	93.8815	0	795.67			1	0	1	0	0	1	0	0	0	0	0	0	0	1	0	0	1	0	0	0	0	0	0	0	1	0	0	0	0	0	0	1	1	0	0	1	0	1	0	0	0	1	1
Zotu265	___eu622841.1__gi:187671968_ ;k__fungi;p__basidiomycota;c__agaricomycetes;o__corticiales;f__corticiaceae;g__laetisaria;s__laetisaria arvalis;subkingdom__dikarya;superkingdom__eukaryota	81.0909	6.09627e-61	239.331			0	0	0	0	0	0	0	0	14	0	0	0	0	0	0	0	0	0	0	0	0	0	0	0	0	0	0	0	0	0	0	0	0	0	0	0	0	0	0	0	0	0	0
Zotu266	___hq127243.1__gi:320148811_ ;k__fungi;p__basidiomycota;c__agaricomycetes;o__polyporales;f__polyporaceae;g__grammothele;s__grammothele fuligo;subkingdom__dikarya;superkingdom__eukaryota	99.1903	1.17889e-120	437.702			0	0	0	0	0	0	0	0	0	0	0	0	0	0	0	0	0	0	0	0	0	0	0	0	0	0	0	0	0	0	0	0	1	0	0	0	0	19	0	0	1	0	0
Zotu267	___fj810171.1__gi:226346625_ ;k__fungi;p__basidiomycota;c__agaricomycetes;o__hymenochaetales;f__hymenochaetaceae;g__hymenochaete;s__hymenochaete adusta;subkingdom__dikarya;superkingdom__eukaryota	85.0267	2.69064e-105	388.109			0	0	0	0	0	0	0	0	0	30	0	0	0	0	0	0	0	0	0	0	0	0	0	0	0	0	0	0	0	0	0	0	0	0	0	0	0	0	0	0	0	0	0
Zotu268	___fj852631.1__gi:226440794_ ;k__fungi;p__ascomycota;c__dothideomycetes;o__pleosporales;f__corynesporascaceae;g__corynespora;s__corynespora cassiicola;subclass pleosporomycetidae;subphylum__pezizomycotina;subkingdom__dikarya;superkingdom__eukaryota	82.7434	1.31299e-55	222.199			0	0	0	0	0	0	0	5	0	1	0	0	0	0	0	0	0	0	0	0	0	0	0	0	3	0	0	0	0	0	0	2	0	0	0	0	0	0	0	0	0	0	0
Zotu269	___am269796.1__gi:158934585_ ;k__fungi;p__basidiomycota;c__agaricomycetes;o__hymenochaetales;f__hymenochaetaceae;g__fuscoporia;s__fuscoporia gilva;subkingdom__dikarya;superkingdom__eukaryota	90.7937	4.71208e-114	416.061			0	0	0	0	0	0	0	0	0	0	0	0	0	0	0	0	0	0	0	0	0	0	0	0	0	0	0	0	0	0	0	0	0	0	0	0	0	0	0	0	0	0	0
Zotu270	___u85799.1__gi:4235186_ ;k__fungi;p__basidiomycota;c__agaricomycetes;o__atheliales;f__atheliaceae;g__athelia;s__athelia pellicularis;subclass agaricomycetidae;subkingdom__dikarya;superkingdom__eukaryota	92.0863	1.33684e-107	395.322			0	0	0	0	0	0	0	0	0	0	0	0	0	0	8	0	0	0	0	0	0	0	0	0	0	0	0	0	0	0	0	0	0	0	0	0	0	0	0	6	0	0	0
Zotu271	___eu118651.1__gi:157057303_ ;k__fungi;p__basidiomycota;c__agaricomycetes;o__russulales;f__peniophoraceae;g__peniophora;s__peniophora pini;subkingdom__dikarya;superkingdom__eukaryota	95.2206	1.83367e-118	431.39			0	0	0	0	0	0	0	0	0	0	0	0	14	0	0	0	0	0	0	0	0	0	0	0	0	0	0	0	0	0	0	0	0	0	0	0	0	0	0	0	0	0	0
Zotu272	sebacina vermifera ;k__fungi;p__basidiomycota;c__agaricomycetes;o__sebacinales;f__serendipitaceae;g__serendipita;s__sebacina vermifera; subphylum__agaricomycotina;subkingdom__dikarya;superkingdom__eukaryota;	78.7986	4.06152e-51	207.772			23	0	0	0	0	0	0	0	0	0	0	0	0	0	0	0	0	0	0	0	0	0	0	0	0	0	0	0	0	0	0	0	0	0	0	0	0	0	0	0	0	0	0
Zotu273	___fj882040.1__gi:269969917_ ;k__fungi;p__basidiomycota;c__agaricomycetes;o__russulales;f__peniophoraceae;g__peniophora;s__peniophora laxitexta;subkingdom__dikarya;superkingdom__eukaryota	98.2063	6.86799e-105	385.404			0	0	0	0	0	0	0	0	6	0	0	0	0	0	0	0	0	0	0	0	0	0	0	0	0	0	0	1	0	0	0	0	0	9	0	0	0	0	0	16	0	0	0
Zotu274	___hm536095.1__gi:317408930_ ;k__fungi;p__basidiomycota;c__agaricomycetes;o__gloeophyllales;f__polyporaceae;g__heliocybe;s__heliocybe sulcata; subphylum__agaricomycotina;subkingdom__dikarya;superkingdom__eukaryota;	71.2727	9.34193e-21	105.882			0	0	0	0	0	0	0	0	0	0	0	0	0	0	0	0	0	0	0	0	0	0	0	0	0	0	0	0	0	0	0	0	0	0	0	0	0	0	0	0	0	0	0
Zotu275	___ay509551.1__gi:40846329_ ;k__fungi;p__basidiomycota;c__agaricomycetes;o__auriculariales;f__exidiaceae;g__ductifera;s__ductifera sucina;subkingdom__dikarya;superkingdom__eukaryota	78.5388	2.52304e-39	167.196			0	0	0	0	0	0	0	0	0	0	0	0	0	0	0	0	0	0	0	0	0	0	0	0	0	0	0	0	0	0	0	0	0	0	0	0	0	0	0	0	0	0	0
Zotu276	___ab615456.1__gi:356995776_ ;k__fungi;p__basidiomycota;c__agaricomycetes;o__gloeophyllales;f__gloeophyllaceae;g__neolentinus;s__neolentinus lepideus;subkingdom__dikarya;superkingdom__eukaryota	98.008	2.64204e-116	424.176			0	0	0	0	0	0	0	0	0	0	0	0	0	0	0	0	0	0	0	1	0	0	0	0	12	0	0	0	0	0	0	0	0	0	0	0	0	0	0	0	0	0	0
Zotu277	___dq340326.1__gi:92110594_ ;k__fungi;p__basidiomycota;c__agaricomycetes;o__hymenochaetales;f__schizoporaceae;g__hyphodontia;s__hyphodontia sambuci; subphylum__agaricomycotina;subkingdom__dikarya;superkingdom__eukaryota;	84.375	2.6491e-72	277.202			0	0	0	0	0	0	0	0	0	0	0	0	0	0	0	0	0	0	0	0	0	0	0	0	0	6	0	0	0	0	0	0	0	0	0	0	0	0	0	0	0	0	0
Zotu278	culex nigripalpus ;k__metazoa;p__arthropoda;c__insecta;o__diptera;f__culicidae;g__culex;s__culex nigripalpus;subgenus culex;tribe__culicini;subfamily__culicinae;superfamily__culicoidea;infraorder__culicomorpha;suborder__nematocera;infraclass endopterygota;subclass neoptera;superclass hexapoda;superkingdom__eukaryota	96.3391	0	851.575			2	0	0	0	0	1	1	0	0	0	0	3	0	1	1	1	0	2	1	1	1	0	0	0	1	0	1	0	0	1	0	1	1	1	0	0	0	14	2	2	6	148	6
Zotu279	___eu232219.1__gi:166361546_ ;k__fungi;p__basidiomycota;c__agaricomycetes;o__polyporales;f__polyporaceae;g__ganoderma;s__ganoderma applanatum; superkingdom__bacteria;species__candidatus gloeomargarita;superkingdom__bacteria;strain__candidatus gloeomargarita;species__candidatus gloeomargarita;superkingdom__bacteria;species__candidatus gloeomargarita;subfamily__melolonthinae;superfamily__scarabaeoi…	90.6977	4.76482e-75	286.219			0	0	0	0	0	0	0	0	1	0	0	0	0	0	0	0	0	0	1	0	0	0	0	0	0	0	2	0	0	0	0	0	0	0	0	0	0	0	0	0	1	0	0
Zotu280	___ef175514.1__gi:140260205_ ;k__fungi;p__basidiomycota;c__agaricomycetes;o__agaricales;f__omphalotaceae;g__marasmiellus;s__marasmiellus candidus; subclass agaricomycetidae;subphylum__agaricomycotina;subkingdom__dikarya;superkingdom__eukaryota;	92.6316	6.26904e-112	409.749			0	0	0	0	0	0	0	0	0	0	0	0	0	0	0	0	0	0	0	0	0	0	0	0	0	0	0	0	0	0	0	0	0	0	0	0	0	0	0	0	0	0	0
Zotu281	pyrofomes demidoffii ;k__fungi;p__basidiomycota;c__agaricomycetes;o__polyporales;f__polyporaceae;g__pyrofomes;s__pyrofomes demidoffii;subkingdom__dikarya;superkingdom__eukaryota	79.3919	7.566e-54	215.887			0	0	0	0	0	0	0	0	0	0	0	0	0	0	0	0	0	0	0	0	0	0	0	0	0	0	0	0	0	0	0	0	0	0	0	0	0	0	0	14	0	0	0
Zotu282	___ay129342.1__gi:27461740_ ;k__fungi;p__basidiomycota;c__agaricomycetes;o__agaricales;f__strophariaceae;g__psilocybe;s__psilocybe cubensis;subclass agaricomycetidae;subkingdom__dikarya;superkingdom__eukaryota	100	9.04798e-155	551.314			0	0	0	0	0	0	0	0	0	0	0	0	0	0	0	0	0	0	0	0	0	0	0	0	0	0	0	0	0	0	0	0	0	0	0	0	0	0	0	0	0	1	0
Zotu283	___af516601.1__gi:33325356_ ;k__fungi;p__basidiomycota;c__agaricomycetes;o__polyporales;f__polyporaceae;g__pseudofavolus;s__pseudofavolus cucullatus;subkingdom__dikarya;superkingdom__eukaryota	93.6877	1.13672e-121	441.308			0	0	0	0	0	0	0	0	0	0	0	0	0	0	0	0	0	0	0	0	0	0	0	0	0	0	0	0	0	0	1	0	0	0	0	0	0	0	0	0	0	0	0
Zotu284	___fj381698.1__gi:228485056_ ;k__fungi;p__ascomycota;c__saccharomycetes;o__saccharomycetales;f__phaffomycetaceae;g__cyberlindnera;s__candida mycetangii;subphylum__saccharomycotina;subkingdom__dikarya;superkingdom__eukaryota	92.0949	3.97512e-95	352.943			0	0	0	0	0	0	0	0	21	0	0	0	0	0	0	0	0	0	0	0	0	0	0	0	0	0	0	0	0	0	0	0	0	0	0	0	0	0	0	0	0	0	0
Zotu285	rhizoctonia solani ;k__fungi;p__basidiomycota;c__agaricomycetes;o__cantharellales;f__ceratobasidiaceae;g__rhizoctonia;s__rhizoctonia solani;subkingdom__dikarya;superkingdom__eukaryota	99.3197	6.09467e-144	515.246			0	0	0	0	0	0	0	0	0	0	0	0	0	0	0	0	0	0	0	0	0	0	0	0	0	0	0	0	0	0	0	0	0	0	0	0	0	0	0	0	0	24	0
Zotu286	___af291284.1__gi:14334007_ ;k__fungi;p__basidiomycota;c__agaricomycetes;o__auriculariales;f__exidiaceae;g__heterochaete;s__heterochaete shearii;subkingdom__dikarya;superkingdom__eukaryota	100	7.9947e-116	421.471			0	0	0	0	0	0	0	0	0	0	0	0	0	0	0	0	0	0	0	0	0	0	0	0	0	0	0	0	0	0	0	0	0	0	0	0	0	0	0	1	0	0	0
Zotu287	___gq169764.1__gi:241912466_ ;k__fungi;p__ascomycota;c__dothideomycetes;o__pleosporales;f__phaeosphaeriaceae;g__phaeosphaeriopsis;s__phaeosphaeriopsis musae;suborder__pleosporineae;subclass pleosporomycetidae;subphylum__pezizomycotina;subkingdom__dikarya;superkingdom__eukaryota	99	3.79618e-94	349.336			0	0	0	0	0	0	0	0	0	0	0	0	0	0	0	0	0	0	0	0	0	0	0	0	0	0	0	0	0	0	0	0	0	0	0	0	0	0	0	0	14	0	1
Zotu288	___eu118622.1__gi:157057274_ ;k__fungi;p__basidiomycota;c__agaricomycetes;o__agaricales;f__cystostereaceae;g__cystidiodontia;s__cystidiodontia laminifera; subclass agaricomycetidae;subphylum__agaricomycotina;subkingdom__dikarya;superkingdom__eukaryota;	82.9861	9.20913e-72	275.398			0	0	0	0	0	0	0	0	0	0	0	1	1	0	0	0	1	0	0	1	0	0	0	0	0	0	0	0	0	0	0	0	0	0	0	0	0	0	22	0	0	11	0
Zotu289	___fj430590.1__gi:238056460_ ;k__fungi;p__ascomycota;c__sordariomycetes;o__xylariales;f__xylariales;g__diatrypasimilis;s__diatrypasimilis australiensis;superkingdom__eukaryota;subkingdom__dikarya;subphylum__pezizomycotina;subclass xylariomycetidae	79.0441	6.38585e-55	220.396			0	0	0	0	0	0	0	0	0	0	0	0	0	0	0	0	0	0	0	0	0	0	0	0	0	0	0	0	0	0	0	0	0	0	0	0	0	0	0	0	0	14	0
Zotu290	___af210819.1__gi:6563323_ ;k__fungi;p__basidiomycota;c__agaricomycetes;o__russulales;f__peniophoraceae;g__peniophora;s__peniophora aurantiaca;subkingdom__dikarya;superkingdom__eukaryota	91.5751	8.36693e-104	382.699			0	0	0	0	0	0	0	0	0	0	0	0	0	0	0	13	0	0	0	0	0	0	0	0	0	0	0	0	0	0	0	0	0	0	0	0	0	0	0	0	0	0	0
Zotu291	___eu219559.1__gi:159024208_ ;k__fungi;p__ascomycota;c__sordariomycetes;o__hypocreales;f__nectriaceae;g__fusarium;s__fusarium oxysporum;subclass hypocreomycetidae;subphylum__pezizomycotina;subkingdom__dikarya;superkingdom__eukaryota	75	8.18384e-34	149.163			0	0	0	0	0	0	0	12	0	0	0	0	0	0	0	0	0	0	0	0	0	0	0	0	6	0	0	0	0	0	0	0	0	0	0	0	0	0	0	0	11	0	0
Zotu292	inocybe cf. rimosa tenn 062716 ;k__fungi;p__basidiomycota;c__agaricomycetes;o__agaricales;f__inocybaceae;g__inocybe;s__inocybe rimosa;subclass agaricomycetidae;subkingdom__dikarya;superkingdom__eukaryota	79.4212	3.05834e-59	234.823			0	0	0	0	0	26	0	0	0	0	0	0	0	0	0	0	0	0	0	0	0	0	0	0	0	0	0	0	0	0	0	0	0	0	0	0	0	0	0	0	0	0	0
Zotu293	___ef175555.1__gi:140260246_ ;k__fungi;p__basidiomycota;c__agaricomycetes;o__agaricales;f__marasmiaceae;g__tetrapyrgos;s__tetrapyrgos subcinerea;subclass agaricomycetidae;subkingdom__dikarya;superkingdom__eukaryota	94.7735	1.30244e-120	437.702			0	0	0	0	0	0	0	0	0	0	0	0	0	0	0	20	0	0	0	0	0	0	0	0	0	0	0	0	0	0	0	0	0	0	0	0	0	0	0	0	0	0	0
Zotu294	leptospora rubella ;k__fungi;p__ascomycota;c__dothideomycetes;o__dothideomycetes;f__dothideomycetes;g__leptospora;s__leptospora rubella;superkingdom__eukaryota;subkingdom__dikarya;subphylum__pezizomycotina	92.7273	5.66098e-106	389.912			0	0	0	0	0	0	0	0	1	0	0	0	0	0	0	0	0	0	0	0	0	0	0	0	0	0	0	0	0	0	0	0	0	0	0	0	0	0	0	0	0	19	0
Zotu295	___ay854086.1__gi:57232720_ ;k__fungi;p__basidiomycota;c__agaricomycetes;o__polyporales;f__phanerochaetaceae;g__phanerochaete;s__phanerochaete chrysosporium;subkingdom__dikarya;superkingdom__eukaryota	87.7698	2.12897e-92	344.828			0	0	11	0	0	0	0	0	0	0	0	0	0	0	0	0	0	0	0	0	0	0	0	0	0	0	0	0	0	0	0	0	0	0	0	0	0	0	0	0	0	0	0
Zotu296	___u68314.1__gi:3540222_ ;k__fungi;p__ascomycota;c__eurotiomycetes;o__onygenales;f__ascosphaeraceae;g__ascosphaera;s__ascosphaera atra;subclass eurotiomycetidae;subphylum__pezizomycotina;subkingdom__dikarya;superkingdom__eukaryota	100	1.12152e-07	62.6008			0	0	0	0	0	0	0	0	0	0	3	17	0	0	0	0	0	0	0	0	0	0	0	0	0	0	0	0	0	0	0	0	0	0	0	0	0	0	0	0	0	0	0
Zotu297	___fj810171.1__gi:226346625_ ;k__fungi;p__basidiomycota;c__agaricomycetes;o__hymenochaetales;f__hymenochaetaceae;g__hymenochaete;s__hymenochaete adusta;subkingdom__dikarya;superkingdom__eukaryota	88.2667	1.15693e-122	444.915			0	0	0	0	0	0	0	0	0	0	0	0	0	0	0	0	0	0	0	0	0	0	0	0	0	0	0	0	0	0	0	0	0	0	0	0	2	0	0	0	0	0	0
Zotu298	___hq441577.1__gi:332015805_ ;k__fungi;p__basidiomycota;c__agaricomycetes;o__auriculariales;f__auriculariales;g__oliveonia;s__oliveonia pauxilla;superkingdom__eukaryota;subkingdom__dikarya	83.6	2.65845e-65	253.758			0	0	0	0	0	0	0	0	0	0	0	0	0	0	0	0	0	0	0	0	0	0	0	1	0	0	0	0	0	0	0	0	0	0	0	0	0	0	0	0	0	0	0
Zotu299	___eu873528.1__gi:214014125_ ;k__fungi;p__ascomycota;c__sordariomycetes;o__sordariomycetes;f__sordariomycetes;g__dendroclathra;s__dendroclathra lignicola; subclass hypocreomycetidae;subphylum__pezizomycotina;subkingdom__dikarya;superkingdom__eukaryota;	85.6522	8.38914e-65	252.856			0	0	0	0	0	0	14	0	0	0	0	0	0	0	0	0	0	0	0	0	0	0	0	0	0	0	0	0	0	0	0	0	0	0	0	0	0	0	0	0	0	0	0
Zotu300	___dq826737.1__gi:110951114_ ;k__fungi;p__ascomycota;c__eurotiomycetes;o__chaetothyriales;f__herpotrichiellaceae;g__capronia;s__capronia pilosella;subclass chaetothyriomycetidae;subphylum__pezizomycotina;subkingdom__dikarya;superkingdom__eukaryota	76.7606	1.08939e-14	86.0446			0	0	0	0	0	0	0	0	0	22	0	0	0	0	0	0	0	0	0	0	0	0	0	0	0	0	0	0	0	0	0	0	0	0	0	0	0	0	0	0	0	0	0
Zotu301	___jf440573.1__gi:328942601_ ;k__fungi;p__basidiomycota;c__agaricomycetes;o__russulales;f__peniophoraceae;g__peniophora;s__peniophora cinerea;subkingdom__dikarya;superkingdom__eukaryota	85.7143	2.69214e-78	297.94			0	0	0	0	0	0	0	0	0	0	0	0	0	1	0	0	0	0	0	0	1	0	0	0	0	12	0	0	0	0	0	0	0	0	0	0	0	0	0	0	0	0	0
Zotu302	___hq608034.1__gi:312434512_ ;k__fungi;p__ascomycota;c__dothideomycetes;o__pleosporales;f__pleosporaceae;g__curvularia;s__cochliobolus australiensis;suborder__pleosporineae;subclass pleosporomycetidae;subphylum__pezizomycotina;subkingdom__dikarya;superkingdom__eukaryota	100	5.49346e-118	428.685			0	0	0	0	0	0	0	0	0	0	0	0	0	1	2	1	3	0	0	0	0	0	0	0	0	0	0	0	1	0	0	2	4	1	0	0	0	0	0	0	0	0	0
Zotu303	nigroporus vinosus ;k__fungi;p__basidiomycota;c__agaricomycetes;o__polyporales;f__steccherinaceae;g__nigroporus;s__nigroporus vinosus; subphylum__agaricomycotina;subkingdom__dikarya;superkingdom__eukaryota;	96.9388	1.03998e-134	484.589			0	0	0	0	0	0	0	0	22	0	0	0	0	0	0	0	0	0	0	0	0	0	0	0	0	0	0	0	0	0	0	0	0	0	0	0	0	0	0	0	0	0	0
Zotu304	No hits found						0	0	19	0	0	0	0	0	0	0	0	0	0	0	0	0	0	0	0	0	0	0	0	0	0	0	0	0	0	0	0	0	0	0	0	0	0	0	0	0	0	0	0
Zotu305	___eu784176.1__gi:209870700_ ;k__fungi;p__basidiomycota;c__agaricomycetes;o__agaricales;f__physalacriaceae;g__armillaria;s__armillaria tabescens;subclass agaricomycetidae;subkingdom__dikarya;superkingdom__eukaryota	98.3051	3.42323e-141	507.131			0	0	0	0	0	0	0	0	0	19	0	0	0	0	0	0	0	0	0	0	0	0	7	2	5	0	0	0	0	0	2	0	0	0	1	0	0	0	0	1	0	0	0
Zotu306	___eu232219.1__gi:166361546_ ;k__fungi;p__basidiomycota;c__agaricomycetes;o__polyporales;f__polyporaceae;g__ganoderma;s__ganoderma applanatum; superkingdom__bacteria;species__candidatus gloeomargarita;superkingdom__bacteria;strain__candidatus gloeomargarita;species__candidatus gloeomargarita;superkingdom__bacteria;species__candidatus gloeomargarita;subfamily__melolonthinae;superfamily__scarabaeoi…	92.7885	7.25749e-79	298.842			0	0	0	0	0	0	0	0	0	0	0	0	0	0	0	1	0	0	0	0	0	0	0	0	0	0	0	0	0	0	0	0	0	0	0	0	0	0	0	0	0	0	0
Zotu307	No hits found						8	0	0	0	0	0	0	0	42	0	0	0	0	0	0	0	0	0	0	0	0	0	0	0	0	0	0	0	0	0	0	0	0	0	0	0	0	0	0	0	0	0	0
Zotu308	___jf907840.1__gi:344332799_ ;k__fungi;p__basidiomycota;c__agaricomycetes;o__agaricales;f__psathyrellaceae;g__coprinopsis;s__coprinopsis spilospora;subclass agaricomycetidae;subkingdom__dikarya;superkingdom__eukaryota	89.1975	4.82318e-114	416.061			0	0	0	0	0	0	0	0	0	0	0	0	0	0	0	0	0	0	0	0	0	0	0	0	11	0	0	0	0	0	0	0	0	0	0	0	0	0	0	0	0	0	0
Zotu309	___gu214649.1__gi:284159062_ ;k__fungi;p__ascomycota;c__dothideomycetes;o__capnodiales;f__capnodiaceae;g__polychaeton;s__polychaeton citri;subclass dothideomycetidae;subphylum__pezizomycotina;subkingdom__dikarya;superkingdom__eukaryota	95.2174	1.14641e-94	352.042			0	0	0	0	0	0	0	0	0	0	0	0	0	17	0	0	0	0	0	0	0	0	0	0	0	0	0	0	0	0	0	0	0	0	0	0	1	0	0	0	0	0	0
Zotu310	___ay952467.1__gi:63253673_ ;k__fungi;p__ascomycota;c__sordariomycetes;o__hypocreales;f__hypocreales;g__stilbella;s__stilbella fimetaria;superkingdom__eukaryota;subkingdom__dikarya;subphylum__pezizomycotina;subclass hypocreomycetidae	88.0658	5.20425e-74	283.514			0	0	0	0	0	0	0	0	0	0	0	0	0	9	0	0	0	0	0	0	0	0	0	0	0	0	0	0	0	0	0	0	0	0	0	0	0	0	0	0	0	0	0
Zotu311	mythimna separata ;k__metazoa;p__arthropoda;c__insecta;o__lepidoptera;f__noctuidae;g__mythimna;s__mythimna separata;subfamily__hadeninae;superfamily__noctuoidea;parvorder__heteroneura;infraorder__neolepidoptera;suborder__glossata;superorder__amphiesmenoptera;infraclass endopterygota;subclass neoptera;superclass hexapoda;superkingdom__eukaryota	95.6522	4.50027	38.2554			25	2	1	0	9	0	0	0	0	0	0	11	0	2	2	1	4	0	0	0	0	0	0	0	0	0	0	0	0	0	0	0	0	0	0	0	0	0	0	0	0	0	0
Zotu312	fuscoporia ferruginosa ;k__fungi;p__basidiomycota;c__agaricomycetes;o__hymenochaetales;f__hymenochaetaceae;g__fuscoporia;s__fuscoporia ferruginosa;subkingdom__dikarya;superkingdom__eukaryota	99.5816	2.26179e-117	427.783			0	0	0	0	0	0	0	0	0	0	0	0	0	0	0	0	0	0	0	0	0	0	0	0	0	0	0	0	0	0	0	0	0	0	0	0	0	0	0	0	0	0	0
Zotu313	___ay256709.1__gi:32450888_ ;k__fungi;p__basidiomycota;c__agaricomycetes;o__agaricales;f__omphalotaceae;g__gymnopus;s__gymnopus luxurians; subclass agaricomycetidae;subphylum__agaricomycotina;subkingdom__dikarya;superkingdom__eukaryota;	100	1.67929e-138	497.213			5	0	0	0	0	0	0	6	0	19	0	0	0	0	0	0	0	0	0	1	0	0	0	0	0	0	0	0	0	0	0	0	0	0	0	0	0	0	0	0	1	0	0
Zotu314	___dq192178.1__gi:76152283_ ;k__fungi;p__basidiomycota;c__agaricomycetes;o__agaricales;f__porotheleaceae;g__clitocybula;s__clitocybula oculus;superkingdom__eukaryota;subkingdom__dikarya;subphylum__agaricomycotina;subclass agaricomycetidae;	76.5579	2.81848e-47	194.247			0	0	0	0	0	0	0	0	0	0	0	0	0	0	0	0	0	0	0	0	0	0	0	0	0	0	0	0	0	0	0	0	0	0	0	0	0	0	0	0	21	0	0
Zotu315	___jf894110.1__gi:335893278_ ;k__fungi;p__basidiomycota;c__agaricomycetes;o__polyporales;f__polyporaceae;g__megasporoporia;s__megasporoporia setulosa; subphylum__agaricomycotina;subkingdom__dikarya;superkingdom__eukaryota;	100	1.13307e-114	417.864			0	0	0	0	0	0	0	0	0	0	0	0	0	0	0	0	0	0	0	0	0	0	0	0	0	0	0	0	0	0	0	0	0	0	1	0	0	0	0	2	2	5	0
Zotu316	___ab263119.1__gi:109452377_ ;k__fungi;p__basidiomycota;c__microbotryomycetes;o__sporidiobolales;f__sporidiobolaceae;g__rhodotorula;s__rhodotorula lamellibrachiae; subphylum__pucciniomycotina;subkingdom__dikarya;superkingdom__eukaryota;	95	2.17478e-17	95.9632			0	0	0	0	0	0	0	0	0	0	0	0	0	0	0	0	0	3	7	4	2	11	7	3	8	0	2	3	2	5	3	4	3	0	1	3	2	0	0	0	0	0	0
Zotu317	___ef433562.1__gi:149364861_ ;k__fungi;p__basidiomycota;c__agaricomycetes;o__hymenochaetales;f__hymenochaetaceae;g__fomitiporia;s__fomitiporia dryophila;subkingdom__dikarya;superkingdom__eukaryota	98.75	4.46964e-159	565.741			0	0	0	0	0	0	0	0	0	0	0	0	0	0	0	0	0	0	0	0	0	0	0	0	0	0	0	0	0	0	0	0	0	0	0	0	0	0	0	0	0	0	0
Zotu318	___af210819.1__gi:6563323_ ;k__fungi;p__basidiomycota;c__agaricomycetes;o__russulales;f__peniophoraceae;g__peniophora;s__peniophora aurantiaca;subkingdom__dikarya;superkingdom__eukaryota	91.2088	1.0193e-102	378.19			0	0	0	0	0	0	0	0	0	0	0	0	0	0	0	0	0	0	0	0	0	0	0	0	0	0	0	0	0	0	0	0	0	0	0	0	0	10	0	0	0	0	0
Zotu319	___jf908431.1__gi:344333388_ ;k__fungi;p__basidiomycota;c__agaricomycetes;o__agaricales;f__tricholomataceae;g__hemimycena;s__hemimycena ochrogaleata;subclass agaricomycetidae;subkingdom__dikarya;superkingdom__eukaryota	84	1.91582e-87	328.598			0	0	0	0	0	0	0	0	0	0	0	0	0	0	0	0	0	0	0	0	0	0	0	0	0	0	0	0	0	0	0	0	0	0	0	0	0	0	0	0	14	0	0
Zotu320	___af085492.1__gi:5880391_ ;k__fungi;p__basidiomycota;c__agaricomycetes;o__agaricales;f__amanitaceae;g__amanita;s__amanita tenuifolia;subclass agaricomycetidae;subkingdom__dikarya;superkingdom__eukaryota	98.8235	8.32486e-123	444.915			0	0	0	0	0	12	0	0	0	0	0	0	0	0	0	0	0	0	0	0	0	0	0	0	0	0	0	0	0	0	1	0	0	0	0	0	0	0	0	1	0	0	0
Zotu321	___ef429240.1__gi:149208237_ ;k__fungi;p__basidiomycota;c__agaricomycetes;o__hymenochaetales;f__hymenochaetaceae;g__phellinus;s__phellinus punctatus;subkingdom__dikarya;superkingdom__eukaryota	99.6875	3.01162e-161	573.856			0	0	0	0	0	0	0	0	0	31	0	0	0	0	0	0	0	0	0	0	0	0	0	0	0	0	0	0	0	0	0	0	0	0	0	0	0	0	0	0	0	0	0
Zotu322	___ay509551.1__gi:40846329_ ;k__fungi;p__basidiomycota;c__agaricomycetes;o__auriculariales;f__exidiaceae;g__ductifera;s__ductifera sucina;subkingdom__dikarya;superkingdom__eukaryota	78.5388	2.55077e-39	167.196			0	0	0	0	0	0	0	0	0	0	0	0	0	0	0	0	0	0	0	2	0	0	0	0	0	0	0	0	0	0	0	0	0	0	0	0	0	0	0	0	0	0	0
Zotu323	___z95495.1__gi:3287273_ ;k__fungi;p__ascomycota;c__sordariomycetes;o__hypocreales;f__hypocreaceae;g__hypocrea;s__hypocrea ceramica;subclass hypocreomycetidae;subphylum__pezizomycotina;subkingdom__dikarya;superkingdom__eukaryota	100	1.99456e-130	470.162			0	0	0	0	0	0	1	0	0	0	0	0	0	0	0	0	1	0	0	0	0	0	0	0	0	0	0	0	0	0	0	0	0	0	0	0	0	0	0	0	0	0	0
Zotu324	___eu400587.1__gi:171466633_ ;k__fungi;p__basidiomycota;c__malasseziomycetes;o__malasseziales;f__malasseziaceae;g__malassezia;s__malassezia restricta;subphylum__ustilaginomycotina;subkingdom__dikarya;superkingdom__eukaryota	100	1.70601e-144	517.05			0	0	0	0	0	0	2	0	0	0	0	2	0	3	0	0	0	0	0	0	0	0	0	0	0	0	0	0	0	0	0	0	0	5	0	0	0	2	0	0	0	0	0
Zotu325	___ay681195.1__gi:56411539_ ;k__fungi;p__ascomycota;c__sordariomycetes;o__sordariales;f__sordariaceae;g__sordaria;s__sordaria tomento_alba;subclass sordariomycetidae;subphylum__pezizomycotina;subkingdom__dikarya;superkingdom__eukaryota	99.2395	2.46171e-129	466.555			0	11	0	0	4	0	0	0	0	0	0	0	0	0	0	0	0	0	0	0	0	0	0	0	0	0	0	0	0	0	0	0	0	0	0	0	0	13	0	0	0	0	0
Zotu326	___hq650601.1__gi:336397014_ ;k__fungi;p__ascomycota;c__lecanoromycetes;o__ostropales;f__stictidaceae;g__stictis;s__stictis urceolatum;subclass ostropomycetidae;subphylum__pezizomycotina;subkingdom__dikarya;superkingdom__eukaryota	77.9951	1.33573e-78	298.842			0	0	0	0	0	0	0	0	0	0	0	0	0	0	0	0	0	0	0	0	0	0	0	0	0	0	0	0	0	0	0	0	0	0	0	0	0	0	26	0	0	0	0
Zotu327	___hq607954.1__gi:312434432_ ;k__fungi;p__basidiomycota;c__agaricomycetes;o__polyporales;f__meruliaceae;g__phlebia;s__phlebia subserialis; subphylum__agaricomycotina;subkingdom__dikarya;superkingdom__eukaryota;	84.5614	6.75874e-80	303.351			0	0	0	0	0	0	0	0	0	0	0	0	0	0	0	0	0	0	0	0	0	0	0	0	0	0	0	0	0	0	0	0	0	0	0	0	0	0	0	0	10	9	0
Zotu328	___gu214634.1__gi:284159047_ ;k__fungi;p__ascomycota;c__dothideomycetes;o__mycosphaerellales;f__teratosphaeriaceae;g__devriesia;s__devriesia lagerstroemiae; subclass dothideomycetidae;subphylum__pezizomycotina;subkingdom__dikarya;superkingdom__eukaryota;	99.5798	6.72489e-117	425.98			0	0	0	0	0	0	0	0	0	0	0	9	0	0	0	0	4	0	0	0	0	0	0	0	0	0	0	0	0	0	0	0	0	0	0	0	0	0	0	0	0	0	0
Zotu329	___dq337383.1__gi:85001732_ ;k__fungi;p__ascomycota;c__dothideomycetes;o__pleosporales;f__pleosporaceae;g__bipolaris;s__cochliobolus sativus;suborder__pleosporineae;subclass pleosporomycetidae;subphylum__pezizomycotina;subkingdom__dikarya;superkingdom__eukaryota	98.5185	2.53598e-129	466.555			0	0	0	0	0	0	0	19	0	0	0	0	0	0	0	0	0	0	0	0	0	0	0	0	0	0	0	0	0	0	0	0	0	0	0	0	0	0	0	0	0	0	0
Zotu330	___ay509555.1__gi:40846333_ ;k__fungi;p__basidiomycota;c__agaricomycetes;o__auriculariales;f__exidiaceae;g__exidia;s__exidia glandulosa;subkingdom__dikarya;superkingdom__eukaryota	91.7355	1.38855e-87	328.598			0	0	0	0	0	0	0	0	0	0	0	0	0	0	0	5	0	0	0	0	0	0	0	0	0	0	0	0	0	0	0	0	0	0	0	0	0	0	4	0	0	0	0
Zotu331	___ay124130.1__gi:22530833_ ;k__fungi;p__ascomycota;c__lecanoromycetes;o__peltigerales;f__nephromataceae;g__nephroma;s__nephroma bellum;suborder__peltigerineae;subclass lecanoromycetidae;subphylum__pezizomycotina;subkingdom__dikarya;superkingdom__eukaryota	98.1481	1.01961e-16	94.1598			0	0	0	0	0	0	0	0	0	0	0	0	0	0	0	0	0	0	0	0	0	0	0	0	0	0	0	0	0	0	0	0	0	0	0	0	0	0	0	0	0	0	0
Zotu332	___ab263119.1__gi:109452377_ ;k__fungi;p__basidiomycota;c__microbotryomycetes;o__sporidiobolales;f__sporidiobolaceae;g__rhodotorula;s__rhodotorula lamellibrachiae; subphylum__pucciniomycotina;subkingdom__dikarya;superkingdom__eukaryota;	95	2.31833e-17	95.9632			0	0	0	0	0	0	0	0	0	0	0	0	0	0	0	0	0	4	4	4	6	0	2	9	4	0	4	1	1	1	5	1	5	0	1	1	4	0	0	0	0	0	0
Highlighted rows are from non-fungal taxa
[truncated: 17 more columns]

## Sheet: C. Final data
otu name	Taxonomy	A020.O [Ae tae]	A021.1.O [Ae tae]	A021.2.O [Ae tae]	A021.3.O [Ae tae]	A022.O [Ae tae]	B011.O [Ae tae]	B179.O [Ae tae]	B299.O [Ae tae]	B332.O [Ae tae]	B424.O [Ae tae]	C007.1.M [Ae tae]	C007.2.M [Ae tae]	C007.3.M [Ae tae]	D025.1.M [Ae tae]	D025.2.M [Ae tae]	D025.3.M [Ae tae]	D025.4.M [Ae tae]	A024.1.O [An atr]	A024.2.O [An atr]	A024.3.O [An atr]	A025.1.O [An atr]	A025.2.O [An atr]	B030.O [An atr]	B131.O [An atr]	B302.O [An atr]	B343.O [An atr]	B373.O [An atr]	C015.M [An atr]	C016.M [An atr]	C017.M [An atr]	C018.M [An atr]	C019.M [An atr]	D017.M [An atr]	D020.M [An atr]	D023.M [An atr]	D048.M [An atr]	D050.M [An atr]	A028.O [Cx nig]	A032.O [Cx nig]	A034.O [Cx nig]	A045.O [Cx nig]	A046.O [Cx nig]	B098.O [Cx nig]	B165.O [Cx nig]	B224.O [Cx nig]	B320.O [Cx nig]	B399.O [Cx nig]	C008.M [Cx nig]
Zotu1	___ab263119.1__gi:109452377_ ;k__fungi;p__basidiomycota;c__microbotryomycetes;o__sporidiobolales;f__sporidiobolaceae;g__rhodotorula;s__rhodotorula lamellibrachiae; subphylum__pucciniomycotina;subkingdom__dikarya;superkingdom__eukaryota;	571	475	455	421	480	379	478	380	411	270	368	417	542	354	290	381	390	74762	72989	78958	68301	80124	70033	57156	72576	189	67068	78749	54518	71104	30006	74221	67480	42555	56320	54041	55564	411	393	482	392	493	362	374	421	246	300	472
Zotu2	___ab263119.1__gi:109452377_ ;k__fungi;p__basidiomycota;c__microbotryomycetes;o__sporidiobolales;f__sporidiobolaceae;g__rhodotorula;s__rhodotorula lamellibrachiae; subphylum__pucciniomycotina;subkingdom__dikarya;superkingdom__eukaryota;	22	19	16	17	23	19	26	21	15	9	23	26	35	17	16	18	17	340	549	886	115	509	5271	203	141	9	211	951	2001	208	48124	495	108	543	634	44	5144	19	17	20	21	27	12	16	12	13	16	29
Zotu3	___ab263119.1__gi:109452377_ ;k__fungi;p__basidiomycota;c__microbotryomycetes;o__sporidiobolales;f__sporidiobolaceae;g__rhodotorula;s__rhodotorula lamellibrachiae; subphylum__pucciniomycotina;subkingdom__dikarya;superkingdom__eukaryota;	14	9	9	9	8	6	13	10	11	11	13	14	12	17	3	13	11	22	2093	567	580	634	27	719	10	3	2187	22	18739	164	19	6373	1179	905	102	1740	283	23	6	14	14	18	6	9	9	9	14	18
Zotu6	___ab263119.1__gi:109452377_ ;k__fungi;p__basidiomycota;c__microbotryomycetes;o__sporidiobolales;f__sporidiobolaceae;g__rhodotorula;s__rhodotorula lamellibrachiae; subphylum__pucciniomycotina;subkingdom__dikarya;superkingdom__eukaryota;	5	5	4	6	3	5	8	4	3	3	5	1	3	3	6	9	3	74	145	81	47	2351	65	10952	72	4	60	290	125	55	150	62	307	821	62	31	55	3	3	7	4	11	4	2	6	4	2	8
Zotu7	___ab263119.1__gi:109452377_ ;k__fungi;p__basidiomycota;c__microbotryomycetes;o__sporidiobolales;f__sporidiobolaceae;g__rhodotorula;s__rhodotorula lamellibrachiae; subphylum__pucciniomycotina;subkingdom__dikarya;superkingdom__eukaryota;	3	3	5	5	11	4	6	8	5	4	5	7	15	7	1	4	3	29	2444	474	554	543	38	464	28	3	1315	47	5750	99	39	2533	529	180	55	973	177	7	9	6	5	9	2	7	7	5	3	10
Zotu27	___ef405864.1__gi:125661831_ ;k__fungi;p__ascomycota;c__dothideomycetes;o__cladosporiales;f__cladosporiaceae;g__cladosporium;s__cladosporium cladosporioides; subclass hypocreomycetidae;subphylum__pezizomycotina;subkingdom__dikarya;superkingdom__eukaryota;species__gondwanamyces;subclass hypocreomycetidae;subphylum__pezizomycotina;subkingdom__dikarya;superkingdom__eukaryota;species__gondwanamyces;s…	0	0	0	0	2	2	1	0	2	0	285	153	92	20	1	52	54	0	0	0	0	0	0	1	0	0	0	22	0	2	2	0	4	21	0	0	2	0	1	1	0	1	0	0	0	0	1	1
Zotu29	___fn298654.1__gi:227284155_ ;k__fungi;p__basidiomycota;c__tremellomycetes;o__tremellales;f__cryptococcaceae;g__cryptococcus;s__cryptococcus wieringae; subphylum__agaricomycotina;subkingdom__dikarya;superkingdom__eukaryota;	0	1	609	0	0	1	1	0	0	0	0	1	0	0	0	0	0	0	0	0	1	0	0	0	1	0	0	0	0	1	0	0	0	0	0	1	0	0	0	0	0	0	0	1	0	0	0	0
Zotu32	___dq826553.1__gi:112363302_ ;k__fungi;p__basidiomycota;c__agaricomycetes;o__hymenochaetales;f__hymenochaetales;g__resinicium;s__resinicium monticola;superkingdom__eukaryota;subkingdom__dikarya	0	0	0	0	0	0	0	0	0	0	0	0	1	0	0	0	1	0	0	1	0	0	0	0	1	626	0	0	0	1	0	0	2	0	0	0	0	0	0	1	1	1	0	1	0	0	0	0
Zotu38	No hits found	9	1	0	0	1	0	0	0	2	0	4	0	0	1	1	0	619	0	0	0	0	0	0	1	0	0	0	0	0	0	0	0	0	0	0	0	0	0	1	0	0	0	1	0	0	0	0	0
Zotu41	___ay341338.1__gi:33356633_ ;k__fungi;p__ascomycota;c__taphrinomycetes;o__taphrinales;f__taphrinaceae;g__taphrina;s__taphrina kruchii;subphylum__taphrinomycotina;subkingdom__dikarya;superkingdom__eukaryota	0	0	0	0	0	0	0	0	0	0	5	14	0	0	5	16	0	0	1	0	0	0	0	0	0	0	0	0	1	0	0	1	0	1	0	0	0	0	0	1	0	0	0	0	0	0	0	0
Zotu44	___aj300334.1__gi:13539171_ ;k__fungi;p__ascomycota;c__dothideomycetes;o__cladosporiales;f__cladosporiaceae;g__cladosporium;s__cladosporium cladosporioides; subclass hypocreomycetidae;subphylum__pezizomycotina;subkingdom__dikarya;superkingdom__eukaryota;species__gondwanamyces;subclass hypocreomycetidae;subphylum__pezizomycotina;subkingdom__dikarya;superkingdom__eukaryota;species__gondwanamyces;su…	0	1	0	0	1	6	8	0	10	0	16	40	9	21	1	43	22	1	1	0	0	0	0	0	0	0	0	25	1	1	1	15	4	8	0	1	2	23	25	2	10	0	5	0	9	0	1	19
Zotu50	___ay046207.1__gi:31746865_ ;k__fungi;p__ascomycota;c__saccharomycetes;o__saccharomycetales;f__saccharomycetaceae;g__lachancea;s__lachancea thermotolerans;subphylum__saccharomycotina;subkingdom__dikarya;superkingdom__eukaryota	1	0	0	0	0	0	0	0	0	0	0	0	0	344	0	0	0	0	1	0	0	0	0	0	2	0	0	2	0	0	1	2	0	8	1	1	0	0	0	1	0	0	0	1	0	0	0	0
Zotu53	No hits found	0	0	0	0	0	0	0	0	316	0	0	0	0	0	0	0	1	0	0	0	0	0	0	0	0	0	0	0	0	0	0	0	0	0	0	0	0	0	0	0	0	0	0	0	0	0	1	0
Zotu54	___eu030147.1__gi:154431721_ ;k__fungi;p__basidiomycota;c__agaricomycetes;o__polyporales;f__polyporaceae;g__coriolopsis;s__coriolopsis caperata; subphylum__agaricomycotina;subkingdom__dikarya;superkingdom__eukaryota;	40	0	4	0	12	0	0	0	40	5	0	0	0	0	0	0	0	1	0	0	5	0	1	0	11	0	1	1	0	0	0	0	0	0	0	0	0	0	16	75	0	31	9	27	0	0	10	0
Zotu59	ganoderma orbiforme ;k__fungi;p__basidiomycota;c__agaricomycetes;o__polyporales;f__polyporaceae;g__ganoderma;s__ganoderma orbiforme; superkingdom__bacteria;species__candidatus gloeomargarita;superkingdom__bacteria;strain__candidatus gloeomargarita;species__candidatus gloeomargarita;superkingdom__bacteria;species__candidatus gloeomargarita;subfamily__melolonthinae;superfamily__scarabaeoidea;infrao…	13	18	0	0	0	0	1	1	0	1	0	21	5	0	0	6	0	0	0	8	3	0	0	1	14	0	0	0	2	0	13	2	0	0	0	0	0	12	55	14	15	19	0	0	1	0	0	0
Zotu62	No hits found	0	2	0	2	1	1	0	0	71	0	2	0	2	1	0	1	155	0	0	0	0	0	0	0	0	0	0	0	0	0	0	0	0	0	0	0	0	0	0	0	0	0	0	0	0	0	0	0
Zotu68	___xm_003005510.1__gi:302415448_ ;k__fungi;p__ascomycota;c__sordariomycetes;o__glomerellales;f__plectosphaerellaceae;g__verticillium;s__verticillium alfalfae; subclass hypocreomycetidae;subphylum__pezizomycotina;subkingdom__dikarya;superkingdom__eukaryota;	0	0	1	0	0	0	0	1	0	0	0	0	0	0	0	0	0	0	0	0	0	0	0	0	0	0	0	0	0	0	0	0	0	0	0	1	0	0	0	0	0	0	0	0	0	0	0	0
Zotu73	___jn164922.1__gi:357216417_ ;k__fungi;p__basidiomycota;c__agaricomycetes;o__polyporales;f__polyporaceae;g__trametes;s__trametes cubensis; subphylum__agaricomycotina;subkingdom__dikarya;superkingdom__eukaryota;	0	0	0	0	0	0	0	0	0	0	4	0	12	0	0	0	0	0	0	0	0	0	0	0	0	0	0	100	6	3	6	23	4	0	0	1	0	0	0	1	0	0	0	0	0	0	0	8
Zotu83	ganoderma orbiforme ;k__fungi;p__basidiomycota;c__agaricomycetes;o__polyporales;f__polyporaceae;g__ganoderma;s__ganoderma orbiforme; superkingdom__bacteria;species__candidatus gloeomargarita;superkingdom__bacteria;strain__candidatus gloeomargarita;species__candidatus gloeomargarita;superkingdom__bacteria;species__candidatus gloeomargarita;subfamily__melolonthinae;superfamily__scarabaeoidea;infrao…	20	0	0	0	0	0	0	0	1	0	0	1	8	0	0	0	0	0	0	2	4	0	0	0	0	0	0	0	0	0	0	1	0	0	0	0	0	0	19	42	0	0	0	42	0	0	2	0
Zotu89	___af455436.1__gi:21666866_ ;k__fungi;p__ascomycota;c__eurotiomycetes;o__eurotiales;f__aspergillaceae;g__penicillium;s__penicillium commune;subclass eurotiomycetidae;subphylum__pezizomycotina;subkingdom__dikarya;superkingdom__eukaryota	0	0	0	1	2	106	0	0	0	0	0	5	0	0	0	0	1	0	0	0	0	0	1	0	0	0	0	0	0	0	0	0	0	0	0	0	0	0	0	0	1	0	0	0	2	0	0	1
Zotu90	___eu030125.1__gi:154431699_ ;k__fungi;p__basidiomycota;c__agaricomycetes;o__polyporales;f__polyporaceae;g__coriolopsis;s__coriolopsis caperata; subphylum__agaricomycotina;subkingdom__dikarya;superkingdom__eukaryota;	43	0	0	0	1	0	0	0	0	0	0	0	0	0	0	0	0	0	0	0	0	0	2	0	0	0	1	0	0	0	0	0	0	1	0	0	0	0	46	10	0	8	6	0	0	0	9	0
Zotu92	___jn182920.1__gi:342674548_ ;k__fungi;p__basidiomycota;c__agaricomycetes;o__polyporales;f__meripilaceae;g__physisporinus;s__physisporinus vitreus; subphylum__agaricomycotina;subkingdom__dikarya;superkingdom__eukaryota;	0	0	0	0	18	4	0	1	0	0	1	0	0	0	0	0	0	0	0	0	3	0	0	0	0	9	1	0	0	0	0	0	0	0	7	0	0	0	0	0	13	0	42	0	1	0	27	0
Zotu96	___fj882040.1__gi:269969917_ ;k__fungi;p__basidiomycota;c__agaricomycetes;o__russulales;f__peniophoraceae;g__peniophora;s__peniophora laxitexta;subkingdom__dikarya;superkingdom__eukaryota	0	0	0	0	0	0	1	0	1	0	0	0	0	0	0	0	0	0	0	0	0	0	0	0	0	0	0	0	0	0	0	0	0	0	0	0	0	0	0	0	0	0	0	0	0	0	0	0
Zotu97	___gq267480.1__gi:254351295_ ;k__fungi;p__basidiomycota;c__agaricomycetes;o__thelephorales;f__thelephoraceae;g__pseudotomentella;s__pseudotomentella tristis;subkingdom__dikarya;superkingdom__eukaryota	0	0	0	1	1	0	0	0	0	0	0	0	0	0	0	0	0	1	0	0	0	0	0	0	0	0	0	1	0	0	0	0	0	0	0	0	0	0	0	0	0	0	0	0	0	0	0	0
Zotu99	___ay124130.1__gi:22530833_ ;k__fungi;p__ascomycota;c__lecanoromycetes;o__peltigerales;f__nephromataceae;g__nephroma;s__nephroma bellum;suborder__peltigerineae;subclass lecanoromycetidae;subphylum__pezizomycotina;subkingdom__dikarya;superkingdom__eukaryota	0	0	0	0	0	0	0	0	0	0	0	0	0	0	0	0	0	1	1	1	0	0	0	0	0	0	0	0	1	0	0	0	0	0	0	0	0	0	0	0	0	0	0	174	0	1	0	0
Zotu101	___fj430590.1__gi:238056460_ ;k__fungi;p__ascomycota;c__sordariomycetes;o__xylariales;f__xylariales;g__diatrypasimilis;s__diatrypasimilis australiensis;superkingdom__eukaryota;subkingdom__dikarya;subphylum__pezizomycotina;subclass xylariomycetidae	0	0	0	0	0	4	0	0	0	0	0	0	0	0	0	0	107	0	0	0	0	0	0	0	0	0	0	0	0	0	0	0	0	0	0	0	0	0	0	0	0	0	0	0	0	0	1	0
Zotu103	___dq826737.1__gi:110951114_ ;k__fungi;p__ascomycota;c__eurotiomycetes;o__chaetothyriales;f__herpotrichiellaceae;g__capronia;s__capronia pilosella;subclass chaetothyriomycetidae;subphylum__pezizomycotina;subkingdom__dikarya;superkingdom__eukaryota	0	0	0	0	0	0	0	0	0	115	0	0	0	0	0	0	0	0	0	0	0	0	0	0	0	0	0	0	0	0	0	0	0	0	0	0	0	0	0	0	0	0	1	0	0	0	0	0
Zotu105	___ef405864.1__gi:125661831_ ;k__fungi;p__ascomycota;c__dothideomycetes;o__cladosporiales;f__cladosporiaceae;g__cladosporium;s__cladosporium cladosporioides; subclass hypocreomycetidae;subphylum__pezizomycotina;subkingdom__dikarya;superkingdom__eukaryota;species__gondwanamyces;subclass hypocreomycetidae;subphylum__pezizomycotina;subkingdom__dikarya;superkingdom__eukaryota;species__gondwanamyces;s…	0	0	0	0	0	1	0	0	0	0	50	14	17	4	0	9	13	0	0	0	0	1	0	1	0	0	0	3	0	1	0	0	2	1	0	0	0	1	0	2	1	0	0	0	0	0	0	1
Zotu107	___ay571045.1__gi:50346942_ ;k__fungi;p__basidiomycota;c__agaricomycetes;o__agaricales;f__schizophyllaceae;g__henningsomyces;s__henningsomyces puber;subclass agaricomycetidae;subkingdom__dikarya;superkingdom__eukaryota	0	0	0	0	0	0	0	0	0	0	0	1	0	0	0	0	4	0	0	0	0	0	0	0	1	0	0	0	0	0	0	0	0	0	6	0	1	1	0	0	99	8	0	0	1	0	0	0
Zotu109	___xm_003005510.1__gi:302415448_ ;k__fungi;p__ascomycota;c__sordariomycetes;o__glomerellales;f__plectosphaerellaceae;g__verticillium;s__verticillium alfalfae; subclass hypocreomycetidae;subphylum__pezizomycotina;subkingdom__dikarya;superkingdom__eukaryota;	0	0	0	0	0	0	0	0	0	0	0	0	0	0	0	0	0	0	0	0	0	0	0	0	0	0	0	0	0	0	0	0	0	0	0	0	0	0	98	0	0	0	1	0	0	0	0	0
Zotu110	___jn164922.1__gi:357216417_ ;k__fungi;p__basidiomycota;c__agaricomycetes;o__polyporales;f__polyporaceae;g__trametes;s__trametes cubensis; subphylum__agaricomycotina;subkingdom__dikarya;superkingdom__eukaryota;	0	0	0	0	0	0	0	0	0	0	0	0	0	0	0	0	0	0	0	0	0	0	0	0	0	0	0	0	0	0	0	0	0	0	0	0	0	0	0	0	0	0	0	0	0	0	0	0
Zotu113	___af210819.1__gi:6563323_ ;k__fungi;p__basidiomycota;c__agaricomycetes;o__russulales;f__peniophoraceae;g__peniophora;s__peniophora aurantiaca;subkingdom__dikarya;superkingdom__eukaryota	0	0	0	0	0	1	0	11	0	0	0	0	0	0	0	11	0	0	1	0	0	0	0	1	0	0	0	0	0	0	1	0	0	0	0	2	0	0	0	7	0	40	0	0	0	0	1	0
Zotu115	___eu784262.1__gi:209870786_ ;k__fungi;p__basidiomycota;c__agaricomycetes;o__russulales;f__hericiaceae;g__hericium;s__hericium coralloides;subkingdom__dikarya;superkingdom__eukaryota	0	0	0	0	0	0	0	0	46	0	0	0	0	0	0	0	0	0	0	0	0	0	0	0	0	0	0	0	0	0	0	0	0	8	0	0	0	0	13	0	0	0	0	0	0	0	7	1
Zotu118	___jf951150.1__gi:338809112_ ;k__fungi;p__ascomycota;c__dothideomycetes;o__capnodiales;f__capnodiaceae;g__leptoxyphium;s__leptoxyphium kurandae;subclass dothideomycetidae;subphylum__pezizomycotina;subkingdom__dikarya;superkingdom__eukaryota	0	0	0	0	0	0	0	0	0	0	0	0	0	0	0	0	84	0	0	0	0	0	0	0	0	0	0	0	0	0	0	0	0	0	0	0	0	0	0	0	0	0	0	0	0	0	0	0
Zotu119	___fj537071.1__gi:254681453_ ;k__fungi;p__ascomycota;c__sordariomycetes;o__xylariales;f__diatrypaceae;g__eutypella;s__eutypella vitis;subclass xylariomycetidae;subphylum__pezizomycotina;subkingdom__dikarya;superkingdom__eukaryota	0	0	0	0	0	0	0	0	0	0	0	0	0	0	1	0	0	0	0	0	0	0	0	0	0	0	0	0	0	0	0	0	0	0	0	0	0	0	0	0	0	0	0	0	0	0	0	82
Zotu120	___dq647495.1__gi:109644650_ ;k__fungi;p__basidiomycota;c__agaricomycetes;o__corticiales;f__corticiaceae;g__peniophorella;s__hyphoderma rude;subkingdom__dikarya;superkingdom__eukaryota	1	0	0	0	0	0	0	0	0	0	0	0	0	0	0	0	0	0	0	0	0	0	0	0	0	0	0	0	0	0	0	1	0	0	0	0	0	0	0	0	0	0	0	0	0	0	0	0
Zotu122	___ay124130.1__gi:22530833_ ;k__fungi;p__ascomycota;c__lecanoromycetes;o__peltigerales;f__nephromataceae;g__nephroma;s__nephroma bellum;suborder__peltigerineae;subclass lecanoromycetidae;subphylum__pezizomycotina;subkingdom__dikarya;superkingdom__eukaryota	0	0	0	0	0	0	0	0	0	0	0	0	0	1	0	0	0	0	0	1	0	0	0	0	0	0	0	0	0	0	0	0	0	0	0	0	0	0	0	1	1	0	0	140	0	0	0	0
Zotu124	___ay216475.1__gi:29373924_ ;k__fungi;p__basidiomycota;c__agaricomycetes;o__agaricales;f__marasmiaceae;g__marasmius;s__marasmius cladophyllus;subclass agaricomycetidae;subkingdom__dikarya;superkingdom__eukaryota	0	0	0	0	6	0	0	16	0	0	0	0	1	0	0	0	0	0	0	0	0	0	1	6	7	0	0	1	0	0	2	0	0	0	0	0	0	0	20	7	1	0	0	0	1	0	5	0
Zotu125	___ay216475.1__gi:29373924_ ;k__fungi;p__basidiomycota;c__agaricomycetes;o__agaricales;f__marasmiaceae;g__marasmius;s__marasmius cladophyllus;subclass agaricomycetidae;subkingdom__dikarya;superkingdom__eukaryota	0	0	0	0	40	0	0	0	0	0	0	17	0	0	0	0	0	0	0	0	0	0	0	0	0	0	0	0	0	0	0	0	0	0	0	0	0	0	0	17	0	0	0	1	0	0	2	0
Zotu128	___dq996040.1__gi:116090385_ ;k__fungi;p__ascomycota;c__sordariomycetes;o__diaporthales;f__valsaceae;g__cytospora;s__cytospora rhizophorae;subclass sordariomycetidae;subphylum__pezizomycotina;subkingdom__dikarya;superkingdom__eukaryota	0	0	0	0	0	0	0	0	0	0	3	0	0	1	0	0	0	0	0	0	1	0	0	0	0	0	0	1	4	0	0	0	0	0	0	0	0	0	0	0	0	0	75	0	0	0	0	0
Zotu129	___gq409535.1__gi:299483230_ ;k__fungi;p__basidiomycota;c__agaricomycetes;o__polyporales;f__hyphodermataceae;g__hyphoderma;s__hyphoderma puberum; subphylum__agaricomycotina;subkingdom__dikarya;superkingdom__eukaryota;	0	0	0	0	0	0	0	0	0	0	0	0	0	0	0	70	0	0	0	0	0	0	0	0	0	0	0	0	0	0	0	0	0	0	0	0	0	0	0	0	0	0	0	0	0	0	0	0
Zotu130	___jn164922.1__gi:357216417_ ;k__fungi;p__basidiomycota;c__agaricomycetes;o__polyporales;f__polyporaceae;g__trametes;s__trametes cubensis; subphylum__agaricomycotina;subkingdom__dikarya;superkingdom__eukaryota;	3	0	0	0	0	0	0	0	0	0	1	11	0	2	0	0	2	0	0	0	0	0	0	0	0	0	0	15	8	0	0	0	0	0	0	0	0	0	0	0	0	0	0	0	0	0	0	0
Zotu131	___ab084616.1__gi:27544648_ ;k__fungi;p__basidiomycota;c__agaricomycetes;o__polyporales;f__meruliaceae;g__phlebia;s__phlebia brevispora; subphylum__agaricomycotina;subkingdom__dikarya;superkingdom__eukaryota;	0	0	0	0	0	0	0	0	69	0	0	0	0	0	0	0	0	0	0	0	0	0	0	0	0	0	1	0	0	0	0	0	0	0	0	0	0	0	0	0	0	0	0	0	0	0	0	0
Zotu133	___fj810129.1__gi:226346583_ ;k__fungi;p__basidiomycota;c__agaricomycetes;o__russulales;f__stereaceae;g__stereum;s__stereum hirsutum;subkingdom__dikarya;superkingdom__eukaryota	0	0	0	0	0	0	0	0	1	0	0	0	0	0	0	0	0	0	0	5	0	0	0	0	7	0	0	5	1	0	0	0	0	0	0	0	0	0	0	0	0	0	0	0	0	0	0	0
Zotu135	___eu707868.1__gi:189031672_ ;k__fungi;p__ascomycota;c__dothideomycetes;o__mycosphaerellales;f__teratosphaeriaceae;g__parateratosphaeria;s__teratosphaeria marasasii; subclass dothideomycetidae;subphylum__pezizomycotina;subkingdom__dikarya;superkingdom__eukaryota;	0	0	0	0	0	4	3	4	0	0	8	4	1	0	0	8	0	0	0	5	0	0	0	0	0	0	0	4	0	0	1	0	0	0	0	0	0	0	0	0	0	0	0	0	0	0	0	7
Zotu136	___ay341338.1__gi:33356633_ ;k__fungi;p__ascomycota;c__taphrinomycetes;o__taphrinales;f__taphrinaceae;g__taphrina;s__taphrina kruchii;subphylum__taphrinomycotina;subkingdom__dikarya;superkingdom__eukaryota	0	0	0	0	0	0	0	0	0	0	0	0	0	0	0	0	0	0	0	0	0	0	0	0	0	0	0	0	0	0	0	0	0	0	0	0	0	0	0	0	0	0	0	0	0	0	0	0
Zotu137	___dq826549.1__gi:112363298_ ;k__fungi;p__basidiomycota;c__agaricomycetes;o__hymenochaetales;f__hymenochaetales;g__resinicium;s__resinicium saccharicola;superkingdom__eukaryota;subkingdom__dikarya	8	0	0	0	0	3	0	0	0	0	0	0	0	0	0	16	0	0	0	0	0	0	0	0	0	0	0	2	0	0	1	0	5	0	0	0	0	0	7	0	8	0	0	0	0	0	0	1
Zotu138	___ab210078.1__gi:113208370_ ;k__fungi;p__basidiomycota;c__agaricomycetes;o__polyporales;f__phanerochaetaceae;g__phanerochaete;s__phanerochaete sordida;subkingdom__dikarya;superkingdom__eukaryota	0	0	0	0	0	0	0	0	0	0	0	0	0	0	0	0	0	0	0	0	0	0	0	0	0	0	0	0	0	0	0	4	0	0	0	0	0	0	0	1	36	16	0	0	0	0	0	0
Zotu139	___fj810171.1__gi:226346625_ ;k__fungi;p__basidiomycota;c__agaricomycetes;o__hymenochaetales;f__hymenochaetaceae;g__hymenochaete;s__hymenochaete adusta;subkingdom__dikarya;superkingdom__eukaryota	0	0	0	0	0	0	0	0	0	10	0	0	0	49	0	4	0	1	0	0	0	0	0	0	0	0	0	0	0	0	0	0	0	0	0	0	0	0	0	2	0	0	0	0	0	0	0	0
Zotu140	___dq647497.1__gi:109644652_ ;k__fungi;p__basidiomycota;c__agaricomycetes;o__corticiales;f__corticiaceae;g__peniophorella;s__hyphoderma rude;subkingdom__dikarya;superkingdom__eukaryota	0	0	0	0	0	0	0	0	1	0	0	0	0	0	0	0	0	0	0	0	0	0	0	0	0	0	0	0	0	0	0	0	0	0	0	0	0	0	0	0	0	0	0	0	0	0	0	0
Zotu141	___gu214649.1__gi:284159062_ ;k__fungi;p__ascomycota;c__dothideomycetes;o__capnodiales;f__capnodiaceae;g__polychaeton;s__polychaeton citri;subclass dothideomycetidae;subphylum__pezizomycotina;subkingdom__dikarya;superkingdom__eukaryota	0	0	0	0	1	0	0	0	0	0	0	0	0	0	0	0	2	0	0	0	0	0	0	0	0	0	0	1	0	0	0	0	0	1	7	0	0	0	0	0	1	0	21	0	0	0	0	0
Zotu142	___fm876211.1__gi:285307442_ ;k__fungi;p__basidiomycota;c__agaricomycetes;o__hymenochaetales;f__schizoporaceae;g__lagarobasidium;s__lagarobasidium detriticum;subkingdom__dikarya;superkingdom__eukaryota	0	0	0	0	0	0	0	0	0	0	0	0	0	0	0	0	1	0	0	0	0	0	0	0	0	0	0	0	0	0	0	0	0	0	0	0	0	0	0	0	0	0	0	0	0	0	0	0
Zotu143	moniliophthora roreri ;k__fungi;p__basidiomycota;c__agaricomycetes;o__agaricales;f__marasmiaceae;g__moniliophthora;s__moniliophthora roreri;subclass agaricomycetidae;subkingdom__dikarya;superkingdom__eukaryota	0	0	0	0	0	0	0	0	0	0	0	0	0	0	0	0	51	0	0	0	0	0	0	0	0	0	0	0	0	0	0	0	0	0	0	0	0	0	0	0	0	0	0	0	0	0	0	0
Zotu144	___u66441.1__gi:2289049_ ;k__fungi;p__basidiomycota;c__agaricomycetes;o__hymenochaetales;f__hymenochaetales;g__sphagnomphalia;s__sphagnomphalia brevibasidiata;superkingdom__eukaryota;subkingdom__dikarya	0	0	0	0	0	0	2	0	0	0	0	0	0	0	0	0	0	0	0	0	0	0	2	0	2	0	0	2	0	0	1	1	0	0	0	0	0	0	0	7	11	20	0	0	0	0	4	0
Zotu145	___gq919077.1__gi:260875648_ ;k__fungi;p__ascomycota;c__sordariomycetes;o__xylariales;f__apiosporaceae;g__nigrospora;s__nigrospora sphaerica; subclass xylariomycetidae;subphylum__pezizomycotina;subkingdom__dikarya;superkingdom__eukaryota;	0	0	0	1	0	0	0	0	0	0	0	0	0	0	0	0	0	0	0	0	0	0	0	0	0	0	0	0	49	0	0	0	0	0	0	0	0	0	0	0	0	0	0	0	0	0	0	0
Zotu146	___ef175526.1__gi:140260217_ ;k__fungi;p__basidiomycota;c__agaricomycetes;o__agaricales;f__marasmiaceae;g__tetrapyrgos;s__tetrapyrgos subcinerea;subclass agaricomycetidae;subkingdom__dikarya;superkingdom__eukaryota	0	0	0	0	0	1	0	0	1	0	0	0	0	0	0	0	0	0	0	0	0	0	0	0	0	0	0	0	0	0	0	0	0	0	0	0	0	0	0	0	55	1	0	0	0	0	0	0
Zotu147	___gq409535.1__gi:299483230_ ;k__fungi;p__basidiomycota;c__agaricomycetes;o__polyporales;f__hyphodermataceae;g__hyphoderma;s__hyphoderma puberum; subphylum__agaricomycotina;subkingdom__dikarya;superkingdom__eukaryota;	0	0	0	0	0	0	0	0	0	0	0	0	0	0	0	0	0	0	0	0	0	0	0	0	0	0	0	0	0	0	0	0	0	0	0	0	0	0	0	0	0	0	0	0	0	0	0	0
Zotu150	___ay571044.1__gi:50346941_ ;k__fungi;p__basidiomycota;c__agaricomycetes;o__agaricales;f__schizophyllaceae;g__henningsomyces;s__henningsomyces candidus;subclass agaricomycetidae;subkingdom__dikarya;superkingdom__eukaryota	0	0	0	0	0	0	0	0	0	0	0	1	0	0	0	0	0	0	0	0	0	0	0	0	0	0	0	0	0	0	0	0	0	0	0	0	0	0	0	0	58	7	0	1	0	0	0	0
Zotu153	___ay341338.1__gi:33356633_ ;k__fungi;p__ascomycota;c__taphrinomycetes;o__taphrinales;f__taphrinaceae;g__taphrina;s__taphrina kruchii;subphylum__taphrinomycotina;subkingdom__dikarya;superkingdom__eukaryota	0	0	0	0	0	0	0	0	0	0	0	0	0	0	1	0	0	0	0	0	0	0	0	0	0	0	0	0	0	0	0	0	0	0	0	0	0	0	0	0	0	0	0	0	0	0	0	0
Zotu155	___ay509555.1__gi:40846333_ ;k__fungi;p__basidiomycota;c__agaricomycetes;o__auriculariales;f__exidiaceae;g__exidia;s__exidia glandulosa;subkingdom__dikarya;superkingdom__eukaryota	7	0	0	0	0	1	0	0	0	0	0	0	1	0	0	0	0	0	0	7	0	0	0	0	0	0	0	0	0	0	0	0	0	0	0	0	0	1	0	18	11	0	0	0	0	0	0	0
Zotu156	___fj903297.1__gi:237641516_ ;k__fungi;p__basidiomycota;c__agaricomycetes;o__corticiales;f__corticiaceae;g__sistotrema;s__sistotrema brinkmannii;subkingdom__dikarya;superkingdom__eukaryota	0	0	0	0	0	0	0	0	0	0	0	0	0	0	0	0	0	0	0	0	0	0	0	0	0	0	0	0	0	0	0	0	0	0	0	0	0	0	42	0	0	0	0	0	0	0	0	0
Zotu158	___eu935573.1__gi:219562430_ ;k__fungi;p__basidiomycota;c__agaricomycetes;o__agaricales;f__marasmiaceae;g__marasmius;s__marasmius nigrobrunneus;forma__marasmius nigrobrunneus nw_2008a;subclass agaricomycetidae;subkingdom__dikarya;superkingdom__eukaryota	0	0	0	0	0	0	0	0	0	0	0	0	0	0	0	0	0	0	0	0	0	0	0	0	0	0	0	0	0	0	0	0	0	0	0	0	0	0	0	1	37	0	0	0	0	0	0	17
Zotu159	___dq361059.1__gi:86517166_ ;k__fungi;p__ascomycota;c__saccharomycetes;o__saccharomycetales;f__saccharomycopsidaceae;g__arthroascus;s__arthroascus fermentans;subphylum__saccharomycotina;subkingdom__dikarya;superkingdom__eukaryota	0	0	0	0	0	0	0	0	0	0	0	0	0	0	0	0	0	0	0	0	0	0	0	0	0	0	0	0	0	0	0	0	0	0	0	0	0	0	0	0	0	0	0	0	0	0	0	0
Zotu160	___ef175514.1__gi:140260205_ ;k__fungi;p__basidiomycota;c__agaricomycetes;o__agaricales;f__omphalotaceae;g__marasmiellus;s__marasmiellus candidus; subclass agaricomycetidae;subphylum__agaricomycotina;subkingdom__dikarya;superkingdom__eukaryota;	0	0	0	0	0	0	0	0	0	0	0	0	0	0	0	1	0	0	0	1	0	0	0	0	0	0	0	0	0	0	0	0	0	13	14	0	0	0	0	0	0	0	0	0	0	0	0	0
Zotu161	___gq303287.1__gi:258578862_ ;k__fungi;p__ascomycota;c__sordariomycetes;o__xylariales;f__xylariales;g__polyscytalum;s__polyscytalum algarvense; subclass xylariomycetidae;subphylum__pezizomycotina;subkingdom__dikarya;superkingdom__eukaryota;	0	0	0	0	0	0	0	0	0	0	0	0	0	0	0	0	0	0	0	0	0	0	1	0	0	0	0	0	0	0	0	0	0	0	0	0	0	0	0	0	0	0	37	0	0	0	0	1
Zotu162	___eu552138.1__gi:189909466_ ;k__fungi;p__ascomycota;c__dothideomycetes;o__pleosporales;f__lophiostomataceae;g__lophiostoma;s__lophiostoma cynaroidis;subclass pleosporomycetidae;subphylum__pezizomycotina;subkingdom__dikarya;superkingdom__eukaryota	0	0	0	0	0	0	0	0	0	0	0	0	0	0	0	0	0	1	0	0	0	0	0	0	0	0	0	0	0	0	0	0	0	0	0	0	0	0	0	0	0	0	0	0	0	0	0	0
Zotu163	___eu118629.1__gi:157057281_ ;k__fungi;p__basidiomycota;c__agaricomycetes;o__corticiales;f__corticiaceae;g__haplotrichum;s__haplotrichum curtisii;subkingdom__dikarya;superkingdom__eukaryota	0	0	0	0	0	0	0	0	0	0	0	0	0	0	1	0	0	0	0	0	0	0	0	0	0	0	0	0	0	0	0	0	0	0	0	0	0	0	0	0	0	0	0	0	0	0	0	0
Zotu164	___ef175514.1__gi:140260205_ ;k__fungi;p__basidiomycota;c__agaricomycetes;o__agaricales;f__omphalotaceae;g__marasmiellus;s__marasmiellus candidus; subclass agaricomycetidae;subphylum__agaricomycotina;subkingdom__dikarya;superkingdom__eukaryota;	0	0	0	0	0	0	0	0	0	0	0	0	0	0	0	38	0	0	0	0	0	0	0	0	0	0	0	0	0	0	0	0	0	0	0	0	0	0	0	0	0	0	0	0	0	0	0	0
Zotu165	___dq534563.1__gi:108744853_ ;k__fungi;p__basidiomycota;c__agaricomycetes;o__boletales;f__boletaceae;g__tylopilus;s__porphyrellus porphyrosporus;subfamily__boletoideae;suborder__boletineae;subclass agaricomycetidae;subkingdom__dikarya;superkingdom__eukaryota	0	0	0	1	0	0	0	0	0	0	0	0	0	0	0	0	0	1	0	0	0	0	0	0	0	0	0	0	0	0	0	0	0	0	0	0	0	0	0	0	20	0	0	13	0	0	0	0
Zotu167	cryptococcus albidus ;k__fungi;p__basidiomycota;c__tremellomycetes;o__tremellales;f__cryptococcaceae;g__cryptococcus;s__cryptococcus albidus; subphylum__agaricomycotina;subkingdom__dikarya;superkingdom__eukaryota;	0	0	0	0	0	0	1	0	0	0	0	0	0	0	0	0	0	0	0	0	0	0	0	0	0	0	0	0	0	0	4	0	0	0	0	0	0	0	0	0	0	30	0	0	0	0	0	0
Zotu168	___gu258309.1__gi:294938564_ ;k__fungi;p__basidiomycota;c__agaricomycetes;o__russulales;f__russulaceae;g__lactarius;s__lactarius wirrabara;subkingdom__dikarya;superkingdom__eukaryota	0	0	0	0	0	0	1	0	0	0	0	0	0	0	0	0	0	0	0	0	1	0	0	0	0	0	0	1	0	0	0	0	0	0	0	0	0	0	0	4	0	0	0	0	0	0	0	0
Zotu170	___jf440592.1__gi:328942620_ ;k__fungi;p__ascomycota;c__sordariomycetes;o__sordariales;f__lasiosphaeriaceae;g__fimetariella;s__fimetariella rabenhorstii;subclass sordariomycetidae;subphylum__pezizomycotina;subkingdom__dikarya;superkingdom__eukaryota	0	0	0	0	0	0	3	0	0	0	0	0	0	0	0	0	0	0	0	0	0	0	0	0	0	0	0	0	0	0	0	0	0	0	0	0	0	0	0	0	0	0	0	0	0	0	0	29
Zotu171	___ab512315.1__gi:254553112_ ;k__fungi;p__basidiomycota;c__agaricomycetes;o__agaricales;f__omphalotaceae;g__marasmiellus;s__marasmiellus candidus; subclass agaricomycetidae;subphylum__agaricomycotina;subkingdom__dikarya;superkingdom__eukaryota;	0	0	0	0	0	0	0	0	0	0	0	0	0	0	0	38	0	0	0	0	0	0	0	0	0	0	0	0	0	0	1	0	0	0	0	0	1	0	0	0	0	0	0	0	0	0	0	0
Zotu172	___ay509555.1__gi:40846333_ ;k__fungi;p__basidiomycota;c__agaricomycetes;o__auriculariales;f__exidiaceae;g__exidia;s__exidia glandulosa;subkingdom__dikarya;superkingdom__eukaryota	0	0	0	0	0	0	0	0	0	0	0	0	0	0	0	0	0	0	0	0	0	0	0	0	0	0	0	0	0	0	0	0	0	0	0	0	0	0	0	0	0	0	0	0	0	0	0	0
Zotu174	___hq607954.1__gi:312434432_ ;k__fungi;p__basidiomycota;c__agaricomycetes;o__polyporales;f__meruliaceae;g__phlebia;s__phlebia subserialis; subphylum__agaricomycotina;subkingdom__dikarya;superkingdom__eukaryota;	0	0	0	0	0	0	0	0	0	0	0	0	0	0	0	0	0	0	0	0	0	0	0	0	0	0	0	1	0	0	0	4	0	0	0	0	0	0	0	0	0	0	0	0	0	0	0	13
Zotu175	hyphoderma obtusiforme ;k__fungi;p__basidiomycota;c__agaricomycetes;o__polyporales;f__hyphodermataceae;g__hyphoderma;s__hyphoderma obtusiforme; subphylum__agaricomycotina;subkingdom__dikarya;superkingdom__eukaryota;	0	0	0	0	0	0	0	0	0	0	0	1	0	0	0	0	0	0	0	2	0	0	0	0	0	0	0	0	0	0	0	0	0	0	0	0	0	0	0	0	15	0	0	0	0	0	0	0
Zotu180	___eu030147.1__gi:154431721_ ;k__fungi;p__basidiomycota;c__agaricomycetes;o__polyporales;f__polyporaceae;g__coriolopsis;s__coriolopsis caperata; subphylum__agaricomycotina;subkingdom__dikarya;superkingdom__eukaryota;	0	0	0	0	0	0	0	0	0	34	0	0	0	0	0	0	0	0	0	0	0	0	0	0	0	0	0	0	0	0	0	0	0	0	0	0	0	0	0	0	0	0	0	0	0	0	1	0
Zotu181	___ab015696.1__gi:4630822_ ;k__fungi;p__basidiomycota;c__agaricomycetes;o__agaricales;f__amanitaceae;g__amanita;s__amanita flavipes;subclass agaricomycetidae;subkingdom__dikarya;superkingdom__eukaryota	0	0	0	0	0	0	0	0	0	0	0	0	0	0	0	0	0	0	0	0	0	0	0	0	0	0	0	0	0	0	0	0	0	0	0	0	0	0	51	0	0	0	0	0	0	0	0	0
Zotu182	___hq533018.1__gi:314913962_ ;k__fungi;p__basidiomycota;c__agaricomycetes;o__hymenochaetales;f__hymenochaetaceae;g__hymenochaete;s__hymenochaete cinnamomea;subkingdom__dikarya;superkingdom__eukaryota	0	0	0	0	0	0	0	0	0	0	0	0	0	0	0	0	0	0	0	0	0	0	0	0	0	0	0	1	0	2	0	3	0	0	0	0	0	9	0	3	8	0	0	0	0	0	0	0
Zotu183	___dq659348.1__gi:110520348_ ;k__fungi;p__ascomycota;c__saccharomycetes;o__saccharomycetales;f__pichiaceae;g__pichia;s__pichia fermentans;subphylum__saccharomycotina;subkingdom__dikarya;superkingdom__eukaryota	0	0	0	0	0	0	0	0	0	0	0	0	0	1	0	1	0	0	0	0	0	0	0	0	0	1	0	2	0	0	0	0	7	0	0	0	0	0	0	0	0	0	0	0	0	1	0	0
Zotu184	No hits found	0	1	0	13	13	0	0	14	4	0	8	0	0	17	0	0	0	0	0	0	0	0	0	0	0	0	0	0	0	0	0	0	0	0	0	0	0	0	0	0	0	0	0	0	0	0	0	0
Zotu185	xylaria longipes ;k__fungi;p__ascomycota;c__sordariomycetes;o__xylariales;f__xylariaceae;g__xylaria;s__xylaria longipes;subclass xylariomycetidae;subphylum__pezizomycotina;subkingdom__dikarya;superkingdom__eukaryota	0	0	0	0	0	0	0	0	0	0	0	10	0	0	0	0	0	0	0	0	0	0	0	0	0	0	0	0	0	0	0	0	0	0	0	0	0	0	0	0	2	0	9	0	0	0	0	0
Zotu188	___ab360356.1__gi:189332652_ ;k__fungi;p__ascomycota;c__sordariomycetes;o__hypocreales;f__cordycipitaceae;g__lecanicillium;s__lecanicillium kalimantanense;subclass hypocreomycetidae;subphylum__pezizomycotina;subkingdom__dikarya;superkingdom__eukaryota	0	0	0	0	0	0	0	0	0	0	0	0	1	0	0	0	0	0	0	0	0	0	0	0	0	0	0	0	0	0	0	0	0	0	0	0	1	0	24	0	0	0	0	0	0	0	0	0
Zotu190	___dq411529.1__gi:89887360_ ;k__fungi;p__basidiomycota;c__agaricomycetes;o__trechisporales;f__hydnodontaceae;g__trechispora;s__trechispora alnicola; subphylum__agaricomycotina;subkingdom__dikarya;superkingdom__eukaryota;	0	0	0	0	11	0	0	0	1	0	0	0	4	0	1	0	0	0	0	0	0	0	0	0	0	0	0	0	0	0	0	0	0	0	4	0	0	0	0	3	13	0	0	0	1	21	0	0
Zotu191	hypoxylon fendleri ;k__fungi;p__ascomycota;c__sordariomycetes;o__xylariales;f__hypoxylaceae;g__hypoxylon;s__hypoxylon fendleri; subclass xylariomycetidae;subphylum__pezizomycotina;subkingdom__dikarya;superkingdom__eukaryota;	0	0	0	0	1	0	0	0	0	0	0	0	1	0	0	0	0	0	0	0	4	0	0	0	0	0	0	0	0	0	0	0	0	0	0	0	0	0	0	0	42	0	0	0	3	0	0	0
Zotu194	No hits found	0	0	0	0	0	0	0	0	0	0	1	0	0	0	0	0	24	0	0	0	0	0	0	0	0	0	0	0	0	0	0	0	0	0	0	0	0	0	0	0	0	0	0	0	0	0	0	0
Zotu195	___eu232219.1__gi:166361546_ ;k__fungi;p__basidiomycota;c__agaricomycetes;o__polyporales;f__polyporaceae;g__ganoderma;s__ganoderma applanatum; superkingdom__bacteria;species__candidatus gloeomargarita;superkingdom__bacteria;strain__candidatus gloeomargarita;species__candidatus gloeomargarita;superkingdom__bacteria;species__candidatus gloeomargarita;subfamily__melolonthinae;superfamily__scarabaeoi…	0	0	0	0	0	0	0	30	10	0	0	0	0	0	3	6	0	0	0	0	0	0	0	0	1	0	0	0	0	0	0	0	0	0	0	0	0	0	0	0	0	0	0	0	0	0	0	0
Zotu196	___aj301908.1__gi:17426612_ ;k__fungi;p__ascomycota;c__sordariomycetes;o__glomerellales;f__glomerellaceae;g__colletotrichum;s__glomerella cingulata;subclass hypocreomycetidae;subphylum__pezizomycotina;subkingdom__dikarya;superkingdom__eukaryota	35	0	0	0	0	0	0	0	0	0	0	0	0	0	0	0	0	0	0	0	0	0	0	0	0	0	0	0	0	0	0	0	0	0	0	0	0	0	0	0	0	0	0	0	0	0	0	0
Zotu199	No hits found	0	0	0	0	0	0	0	0	0	0	0	0	0	0	0	0	25	0	0	0	0	0	0	0	0	0	0	0	0	0	0	0	0	0	0	0	0	0	0	0	0	0	0	0	0	0	0	0
Zotu200	___fj481022.1__gi:218664615_ ;k__fungi;p__basidiomycota;c__agaricomycetes;o__hymenochaetales;f__hymenochaetaceae;g__pseudochaete;s__pseudochaete tabacina;subkingdom__dikarya;superkingdom__eukaryota	0	0	0	0	0	0	0	0	0	0	0	0	0	0	0	0	0	0	0	0	0	0	0	0	0	0	0	0	0	0	0	0	0	0	0	0	0	0	0	0	0	0	0	0	0	0	0	0
Zotu201	fuscoporia ferruginosa ;k__fungi;p__basidiomycota;c__agaricomycetes;o__hymenochaetales;f__hymenochaetaceae;g__fuscoporia;s__fuscoporia ferruginosa;subkingdom__dikarya;superkingdom__eukaryota	0	0	0	0	0	1	0	0	0	0	0	0	0	0	0	0	0	0	0	0	0	0	0	0	0	0	0	0	1	0	0	1	1	0	0	0	0	29	3	0	13	0	0	0	0	0	0	0
Zotu202	___gq409535.1__gi:299483230_ ;k__fungi;p__basidiomycota;c__agaricomycetes;o__polyporales;f__hyphodermataceae;g__hyphoderma;s__hyphoderma puberum; subphylum__agaricomycotina;subkingdom__dikarya;superkingdom__eukaryota;	0	0	0	0	0	0	0	0	0	0	0	0	0	20	0	0	0	0	0	0	0	0	0	0	0	0	0	0	0	0	0	0	0	0	0	1	0	0	0	0	0	0	0	0	0	0	0	0
Zotu205	___jf908384.1__gi:344333341_ ;k__fungi;p__basidiomycota;c__agaricomycetes;o__agaricales;f__mycenaceae;g__mycena;s__mycena acicula; subclass agaricomycetidae;subphylum__agaricomycotina;subkingdom__dikarya;superkingdom__eukaryota;	0	0	0	0	0	0	0	0	0	0	0	0	0	0	0	0	0	0	0	0	0	0	0	0	0	0	0	0	0	0	0	0	0	0	0	0	0	0	0	0	0	0	0	0	0	0	29	0
Zotu206	___gu207282.1__gi:288887199_ ;k__fungi;p__basidiomycota;c__agaricomycetes;o__polyporales;f__polyporaceae;g__lentinus;s__lentinus crinitus; subphylum__agaricomycotina;subkingdom__dikarya;superkingdom__eukaryota;	0	0	0	0	1	0	0	0	0	0	0	0	0	0	0	0	0	0	0	0	0	0	0	0	0	0	0	2	0	0	0	0	0	0	0	0	0	0	7	0	0	0	0	0	1	0	0	0
Zotu207	___ay216474.1__gi:29373923_ ;k__fungi;p__basidiomycota;c__agaricomycetes;o__agaricales;f__physalacriaceae;g__oudemansiella;s__oudemansiella canarii;subclass agaricomycetidae;subkingdom__dikarya;superkingdom__eukaryota	0	0	0	0	0	0	0	0	0	0	0	0	2	0	0	0	0	0	0	0	0	0	7	0	0	0	0	0	0	0	0	0	0	0	0	0	0	0	0	0	24	0	0	0	0	0	0	0
Zotu208	___af210819.1__gi:6563323_ ;k__fungi;p__basidiomycota;c__agaricomycetes;o__russulales;f__peniophoraceae;g__peniophora;s__peniophora aurantiaca;subkingdom__dikarya;superkingdom__eukaryota	0	0	0	0	0	0	0	0	0	0	0	0	0	0	0	0	6	0	0	0	2	0	0	0	0	0	0	0	0	0	0	1	0	0	6	0	0	10	0	0	10	0	0	0	0	0	0	0
Zotu209	___hq607954.1__gi:312434432_ ;k__fungi;p__basidiomycota;c__agaricomycetes;o__polyporales;f__meruliaceae;g__phlebia;s__phlebia subserialis; subphylum__agaricomycotina;subkingdom__dikarya;superkingdom__eukaryota;	0	0	0	0	0	0	0	0	0	0	0	0	0	0	0	0	0	0	0	0	0	0	0	0	0	0	0	0	7	0	5	1	0	0	0	0	0	0	0	0	0	0	0	0	0	0	0	0
Zotu210	rigidoporus crocatus ;k__fungi;p__basidiomycota;c__agaricomycetes;o__polyporales;f__meripilaceae;g__rigidoporus;s__rigidoporus crocatus; subphylum__agaricomycotina;subkingdom__dikarya;superkingdom__eukaryota;	0	0	0	0	0	0	0	0	0	0	0	0	0	0	0	0	0	0	0	0	0	0	0	0	0	0	0	0	0	0	0	0	0	0	0	0	0	12	27	0	0	0	0	0	0	0	0	0
Zotu214	___ay571031.1__gi:50346928_ ;k__fungi;p__basidiomycota;c__agaricomycetes;o__agaricales;f__tricholomataceae;g__calyptella;s__calyptella capula;subclass agaricomycetidae;subkingdom__dikarya;superkingdom__eukaryota	0	0	0	0	0	0	0	0	0	0	0	0	0	0	0	0	0	0	0	0	0	0	0	0	0	0	0	0	1	0	0	0	0	0	0	0	0	0	0	30	0	0	0	0	0	0	0	0
Zotu215	___hq607954.1__gi:312434432_ ;k__fungi;p__basidiomycota;c__agaricomycetes;o__polyporales;f__meruliaceae;g__phlebia;s__phlebia subserialis; subphylum__agaricomycotina;subkingdom__dikarya;superkingdom__eukaryota;	0	0	0	0	0	0	0	0	0	0	0	0	0	0	0	1	0	0	0	0	0	0	0	0	0	0	0	3	0	2	0	0	0	0	0	0	0	0	0	0	8	0	0	0	0	0	0	0
Zotu217	___jn164922.1__gi:357216417_ ;k__fungi;p__basidiomycota;c__agaricomycetes;o__polyporales;f__polyporaceae;g__trametes;s__trametes cubensis; subphylum__agaricomycotina;subkingdom__dikarya;superkingdom__eukaryota;	0	0	0	0	0	0	0	0	0	0	0	0	0	0	0	0	0	0	0	0	0	0	0	0	1	0	0	0	0	0	0	0	0	32	0	0	0	0	0	0	0	0	0	0	0	0	0	0
Zotu218	___fj487920.1__gi:218938069_ ;k__fungi;p__ascomycota;c__sordariomycetes;o__diaporthales;f__valsaceae;g__valsa;s__valsa brevispora;subclass sordariomycetidae;subphylum__pezizomycotina;subkingdom__dikarya;superkingdom__eukaryota	0	0	0	1	0	0	0	0	0	0	0	5	0	0	0	0	0	0	0	0	0	0	0	4	0	0	0	0	0	0	0	0	0	0	3	0	0	0	0	0	0	0	1	0	0	0	23	0
Zotu219	___hq607954.1__gi:312434432_ ;k__fungi;p__basidiomycota;c__agaricomycetes;o__polyporales;f__meruliaceae;g__phlebia;s__phlebia subserialis; subphylum__agaricomycotina;subkingdom__dikarya;superkingdom__eukaryota;	0	0	0	0	0	0	0	0	0	0	0	0	0	0	0	0	0	0	0	5	0	0	0	8	0	0	0	0	0	0	0	0	0	0	0	0	0	0	0	0	0	10	0	0	0	0	0	0
Zotu220	___fj478095.1__gi:218454071_ ;k__fungi;p__basidiomycota;c__agaricomycetes;o__agaricales;f__psathyrellaceae;g__psathyrella;s__psathyrella artemisiae;subclass agaricomycetidae;subkingdom__dikarya;superkingdom__eukaryota	0	0	0	0	0	0	0	0	0	0	0	0	0	0	0	0	0	0	0	0	0	0	0	0	0	0	0	0	0	0	0	0	0	0	0	0	0	0	0	0	0	0	0	0	0	0	0	0
Zotu221	___fj903297.1__gi:237641516_ ;k__fungi;p__basidiomycota;c__agaricomycetes;o__corticiales;f__corticiaceae;g__sistotrema;s__sistotrema brinkmannii;subkingdom__dikarya;superkingdom__eukaryota	0	0	0	0	0	0	0	0	0	0	0	0	0	0	0	0	0	0	0	0	0	0	0	0	0	0	0	0	0	0	0	0	0	0	0	0	0	0	0	0	19	0	0	0	0	0	0	0
Zotu222	___af210819.1__gi:6563323_ ;k__fungi;p__basidiomycota;c__agaricomycetes;o__russulales;f__peniophoraceae;g__peniophora;s__peniophora aurantiaca;subkingdom__dikarya;superkingdom__eukaryota	0	0	0	0	0	0	0	0	0	0	0	0	0	0	0	0	0	0	0	0	0	0	0	0	0	0	0	0	0	0	0	0	0	0	0	0	0	0	0	0	0	0	0	0	0	0	0	0
Zotu224	___af237731.2__gi:13699894_ ;k__fungi;p__basidiomycota;c__agaricomycetes;o__hymenochaetales;f__hymenochaetaceae;g__inocutis;s__inocutis rheades;subkingdom__dikarya;superkingdom__eukaryota	0	0	0	0	0	0	0	0	0	0	0	0	0	0	0	0	0	0	0	0	0	0	0	0	0	0	0	0	0	0	0	0	0	0	0	0	0	0	0	0	0	0	0	0	0	0	0	0
Zotu226	___aj560679.1__gi:46559598_ ;k__fungi;p__ascomycota;c__sordariomycetes;o__hypocreales;f__cordycipitaceae;g__beauveria;s__cordyceps bassiana;subclass hypocreomycetidae;subphylum__pezizomycotina;subkingdom__dikarya;superkingdom__eukaryota	0	0	0	0	0	0	0	0	0	0	0	29	0	0	0	0	0	0	0	0	1	0	0	0	0	0	0	0	0	0	0	0	0	0	0	0	0	0	0	0	0	0	0	0	0	0	0	0
Zotu228	___am269796.1__gi:158934585_ ;k__fungi;p__basidiomycota;c__agaricomycetes;o__hymenochaetales;f__hymenochaetaceae;g__fuscoporia;s__fuscoporia gilva;subkingdom__dikarya;superkingdom__eukaryota	4	0	0	0	0	0	0	0	0	0	0	26	0	0	0	0	0	0	0	0	1	0	2	0	0	0	0	4	2	0	0	0	0	0	0	0	0	0	5	3	0	0	0	0	0	0	0	0
Zotu229	___gu187509.1__gi:300394313_ ;k__fungi;p__basidiomycota;c__agaricomycetes;o__agaricales;f__radulomycetaceae;g__aphanobasidium;s__aphanobasidium pseudotsugae; subclass agaricomycetidae;subphylum__agaricomycotina;subkingdom__dikarya;superkingdom__eukaryota;	0	0	0	0	0	0	0	0	0	0	0	0	0	0	0	0	0	0	0	0	0	0	0	0	0	0	0	0	0	0	0	0	0	0	0	0	0	0	0	8	26	0	0	0	0	0	0	0
Zotu230	___ay558595.1__gi:46810526_ ;k__fungi;p__basidiomycota;c__agaricomycetes;o__hymenochaetales;f__hymenochaetaceae;g__hymenochaete;s__hymenochaete denticulata;subkingdom__dikarya;superkingdom__eukaryota	0	0	0	0	0	0	0	0	0	0	0	0	0	0	0	0	0	0	0	0	0	0	0	0	0	0	0	0	0	0	0	0	0	0	0	0	0	0	0	0	0	0	30	0	0	0	0	0
Zotu231	___af210819.1__gi:6563323_ ;k__fungi;p__basidiomycota;c__agaricomycetes;o__russulales;f__peniophoraceae;g__peniophora;s__peniophora aurantiaca;subkingdom__dikarya;superkingdom__eukaryota	0	0	0	0	0	0	0	0	0	0	0	0	0	0	0	0	0	0	0	0	0	0	0	0	0	0	0	0	0	0	0	0	0	0	0	0	0	0	0	0	0	0	0	0	0	0	0	0
Zotu232	sidera vulgaris ;k__fungi;p__basidiomycota;c__agaricomycetes;o__hymenochaetales;f__rickenellaceae;g__sidera;s__sidera vulgaris;subkingdom__dikarya;superkingdom__eukaryota	0	0	0	0	0	0	0	0	11	0	0	0	0	0	0	0	0	0	0	0	0	0	0	0	14	0	0	1	0	0	0	0	0	0	0	0	0	0	0	0	0	0	0	0	0	0	16	0
Zotu237	___ef175526.1__gi:140260217_ ;k__fungi;p__basidiomycota;c__agaricomycetes;o__agaricales;f__marasmiaceae;g__tetrapyrgos;s__tetrapyrgos subcinerea;subclass agaricomycetidae;subkingdom__dikarya;superkingdom__eukaryota	0	0	0	0	0	0	0	0	0	0	0	0	0	0	0	27	0	0	0	0	0	0	0	0	0	0	0	0	0	0	0	0	0	0	0	0	0	0	0	0	0	11	0	0	0	0	0	0
Zotu238	___dq490627.1__gi:94962114_ ;k__fungi;p__basidiomycota;c__agaricomycetes;o__agaricales;f__porotheleaceae;g__hydropus;s__hydropus marginellus;superkingdom__eukaryota;subkingdom__dikarya;subphylum__agaricomycotina;subclass agaricomycetidae;	0	0	0	0	0	0	0	36	0	0	0	0	0	0	0	0	0	0	1	0	0	0	0	0	2	0	0	0	0	0	0	0	0	0	0	0	0	0	0	0	0	0	0	0	0	0	0	0
Zotu239	sidera vulgaris ;k__fungi;p__basidiomycota;c__agaricomycetes;o__hymenochaetales;f__rickenellaceae;g__sidera;s__sidera vulgaris;subkingdom__dikarya;superkingdom__eukaryota	0	0	0	0	1	0	0	0	0	0	0	20	0	0	0	0	0	0	0	0	0	0	0	0	0	11	0	0	2	0	0	0	0	0	0	0	0	0	0	0	1	0	0	0	0	0	1	0
Zotu240	___ay916686.1__gi:64475669_ ;k__fungi;p__basidiomycota;c__agaricomycetes;o__agaricales;f__marasmiaceae;g__chaetocalathus;s__chaetocalathus columellifer;subclass agaricomycetidae;subkingdom__dikarya;superkingdom__eukaryota	0	0	0	0	0	0	0	23	0	0	0	0	0	0	0	0	0	0	0	0	0	0	0	0	0	0	0	0	0	0	0	0	0	0	0	0	0	5	0	0	0	0	0	0	0	0	0	0
Zotu241	engyodontium album ;k__fungi;p__ascomycota;c__ascomycota;o__ascomycota;f__ascomycota;g__engyodontium;s__engyodontium album;superkingdom__eukaryota;subkingdom__dikarya	0	0	0	0	0	0	0	0	0	0	0	0	0	0	0	0	0	0	0	0	0	0	0	1	0	0	0	0	0	0	0	0	0	0	0	0	0	0	0	1	0	0	0	0	0	0	0	0
Zotu242	neonothopanus nambi ;k__fungi;p__basidiomycota;c__agaricomycetes;o__agaricales;f__omphalotaceae;g__neonothopanus;s__neonothopanus nambi; subclass agaricomycetidae;subphylum__agaricomycotina;subkingdom__dikarya;superkingdom__eukaryota;	0	0	0	0	0	0	0	0	0	1	0	0	0	0	0	0	0	0	0	0	0	0	0	0	0	0	0	0	0	0	0	0	0	0	0	0	0	0	0	0	0	0	0	0	0	0	0	0
Zotu243	neonothopanus nambi ;k__fungi;p__basidiomycota;c__agaricomycetes;o__agaricales;f__omphalotaceae;g__neonothopanus;s__neonothopanus nambi; subclass agaricomycetidae;subphylum__agaricomycotina;subkingdom__dikarya;superkingdom__eukaryota;	0	0	0	0	0	0	0	0	0	0	0	0	0	0	0	0	0	0	0	0	0	0	0	0	0	0	0	0	0	0	0	0	0	0	0	0	0	20	0	0	0	0	0	0	0	0	0	0
Zotu244	___af200240.1__gi:6470316_ ;k__fungi;p__basidiomycota;c__agaricomycetes;o__hymenochaetales;f__hymenochaetaceae;g__phellinus;s__phellinus tremulae;subkingdom__dikarya;superkingdom__eukaryota	14	0	0	0	0	0	0	0	3	0	0	0	0	0	0	0	0	0	0	0	1	0	3	0	4	0	0	0	0	0	4	0	0	0	0	1	0	0	0	0	36	10	0	0	0	0	3	11
Zotu245	___hq599594.1__gi:313800033_ ;k__fungi;p__ascomycota;c__dothideomycetes;o__mycosphaerellales;f__teratosphaeriaceae;g__phaeothecoidea;s__phaeothecoidea melaleuca; subclass dothideomycetidae;subphylum__pezizomycotina;subkingdom__dikarya;superkingdom__eukaryota;	0	0	0	0	0	0	0	0	0	0	0	0	0	0	0	1	0	0	0	0	0	0	0	0	0	0	0	0	0	0	0	0	4	0	15	0	0	0	0	0	0	0	0	0	0	0	0	9
Zotu246	___ay571061.1__gi:50346958_ ;k__fungi;p__basidiomycota;c__agaricomycetes;o__agaricales;f__tricholomataceae;g__resupinatus;s__resupinatus conspersus;subclass agaricomycetidae;subkingdom__dikarya;superkingdom__eukaryota	0	0	0	0	0	0	0	0	0	0	0	0	0	0	0	15	0	0	0	0	0	0	0	0	0	0	0	0	0	0	1	0	0	0	0	0	0	0	0	0	0	0	0	0	0	0	1	0
Zotu247	___ab361644.1__gi:157678733_ ;k__fungi;p__basidiomycota;c__agaricomycetes;o__polyporales;f__phanerochaetaceae;g__phanerochaete;s__phanerochaete chrysosporium;subkingdom__dikarya;superkingdom__eukaryota	0	0	0	0	0	0	0	0	0	0	0	0	0	0	0	0	0	0	0	0	0	0	0	0	0	0	0	9	0	3	0	4	0	0	0	0	0	0	0	0	0	0	0	0	0	0	0	0
Zotu248	___fj882040.1__gi:269969917_ ;k__fungi;p__basidiomycota;c__agaricomycetes;o__russulales;f__peniophoraceae;g__peniophora;s__peniophora laxitexta;subkingdom__dikarya;superkingdom__eukaryota	0	0	0	0	0	0	0	0	0	0	0	0	0	0	0	0	0	0	0	0	0	0	0	0	0	0	0	0	0	0	0	0	0	0	0	0	0	0	0	0	0	0	0	0	0	0	0	0
Zotu251	___jf951150.1__gi:338809112_ ;k__fungi;p__ascomycota;c__dothideomycetes;o__capnodiales;f__capnodiaceae;g__leptoxyphium;s__leptoxyphium kurandae;subclass dothideomycetidae;subphylum__pezizomycotina;subkingdom__dikarya;superkingdom__eukaryota	0	0	0	0	0	0	0	0	0	0	0	0	0	0	0	0	27	0	0	0	0	0	0	0	0	0	0	0	0	0	0	0	0	0	0	0	0	0	0	0	0	0	0	0	0	0	0	0
Zotu252	___gu222266.1__gi:281376773_ ;k__fungi;p__basidiomycota;c__agaricomycetes;o__polyporales;f__grifolaceae;g__grifola;s__grifola sordulenta; subphylum__agaricomycotina;subkingdom__dikarya;superkingdom__eukaryota;	0	0	0	0	0	0	0	0	17	0	0	0	0	0	0	0	0	0	0	0	0	0	0	0	0	0	0	0	0	0	0	0	0	0	0	0	0	0	0	0	0	0	0	0	0	1	0	0
Zotu253	___ab041236.1__gi:13661066_ ;k__fungi;p__ascomycota;c__dothideomycetes;o__botryosphaeriales;f__phyllostictaceae;g__phyllosticta;s__guignardia mangiferae;subphylum__pezizomycotina;subkingdom__dikarya;superkingdom__eukaryota	0	0	0	0	0	0	0	0	0	0	0	0	0	0	1	0	0	0	0	0	0	0	0	0	0	0	0	0	0	0	0	0	0	0	0	0	0	0	0	0	0	0	0	0	0	0	26	0
Zotu255	___hq270178.1__gi:307948750_ ;k__fungi;p__basidiomycota;c__agaricomycetes;o__corticiales;f__corticiaceae;g__waitea;s__waitea circinata; subphylum__agaricomycotina;subkingdom__dikarya;superkingdom__eukaryota;subphylum__agaricomycotina;subkingdom__dikarya;superkingdom__eukaryota;subphylum__agaricomycotina;subkingdom__dikarya;superkingdom__eukaryota;subphylum__agaricomycotina;subkingdom__dikarya;sup…	0	0	0	0	0	0	0	0	27	0	0	0	0	0	0	0	0	0	0	0	0	0	0	0	0	0	0	0	0	0	0	0	0	0	0	0	0	0	0	0	0	0	0	0	0	0	0	0
Zotu257	___ef429238.1__gi:149208235_ ;k__fungi;p__basidiomycota;c__agaricomycetes;o__hymenochaetales;f__hymenochaetaceae;g__phellinus;s__phellinus punctatus;subkingdom__dikarya;superkingdom__eukaryota	0	0	0	0	1	0	0	0	0	0	0	0	0	0	0	0	0	0	0	0	0	0	0	0	0	0	0	0	0	0	0	0	0	0	0	0	0	0	15	4	0	0	0	0	0	0	0	0
Zotu258	___eu232219.1__gi:166361546_ ;k__fungi;p__basidiomycota;c__agaricomycetes;o__polyporales;f__polyporaceae;g__ganoderma;s__ganoderma applanatum; superkingdom__bacteria;species__candidatus gloeomargarita;superkingdom__bacteria;strain__candidatus gloeomargarita;species__candidatus gloeomargarita;superkingdom__bacteria;species__candidatus gloeomargarita;subfamily__melolonthinae;superfamily__scarabaeoi…	0	0	0	0	0	0	0	0	0	0	0	0	0	0	0	0	0	0	0	0	0	0	0	0	0	0	0	0	0	0	0	0	0	0	0	0	0	0	0	0	17	0	0	0	0	0	0	1
Zotu260	___u66455.1__gi:2289063_ ;k__fungi;p__basidiomycota;c__agaricomycetes;o__agaricales;f__hygrophoraceae;g__arrhenia;s__arrhenia velutipes;superkingdom__eukaryota;subkingdom__dikarya;subphylum__agaricomycotina;subclass agaricomycetidae;	0	0	0	0	19	0	0	0	0	0	0	0	0	0	0	0	0	0	0	0	0	0	0	0	0	0	0	0	0	0	0	0	0	0	0	0	0	0	0	0	0	0	0	0	0	0	0	3
Zotu261	___dq911612.1__gi:115291780_ ;k__fungi;p__basidiomycota;c__agaricomycetes;o__corticiales;f__corticiaceae;g__haplotrichum;s__haplotrichum conspersum;subkingdom__dikarya;superkingdom__eukaryota	0	0	0	0	0	0	0	0	0	0	0	0	0	0	0	0	0	0	0	0	0	0	0	0	0	0	0	0	0	0	0	0	0	0	0	0	0	0	0	0	0	0	0	0	0	0	0	0
Zotu262	___ab306311.1__gi:166197408_ ;k__fungi;p__basidiomycota;c__agaricomycetes;o__agaricales;f__psathyrellaceae;g__psathyrella;s__psathyrella candolleana;subclass agaricomycetidae;subkingdom__dikarya;superkingdom__eukaryota	0	0	0	0	0	0	0	0	0	0	0	0	0	0	0	0	0	0	0	0	0	0	0	0	0	0	0	0	0	0	0	0	0	0	0	0	0	0	0	0	0	0	0	0	0	0	0	0
Zotu263	hyphoderma obtusiforme ;k__fungi;p__basidiomycota;c__agaricomycetes;o__polyporales;f__hyphodermataceae;g__hyphoderma;s__hyphoderma obtusiforme; subphylum__agaricomycotina;subkingdom__dikarya;superkingdom__eukaryota;	0	0	1	0	0	0	0	0	0	0	0	0	0	0	0	1	0	0	0	0	0	0	0	0	0	0	0	0	0	0	0	0	3	0	1	0	0	0	0	0	0	0	0	0	0	0	0	0
Zotu265	___eu622841.1__gi:187671968_ ;k__fungi;p__basidiomycota;c__agaricomycetes;o__corticiales;f__corticiaceae;g__laetisaria;s__laetisaria arvalis;subkingdom__dikarya;superkingdom__eukaryota	0	0	0	0	0	0	0	0	14	0	0	0	0	0	0	0	0	0	0	0	0	0	0	0	0	0	0	0	0	0	0	0	0	0	0	0	0	0	0	0	0	0	0	0	0	0	0	0
Zotu266	___hq127243.1__gi:320148811_ ;k__fungi;p__basidiomycota;c__agaricomycetes;o__polyporales;f__polyporaceae;g__grammothele;s__grammothele fuligo;subkingdom__dikarya;superkingdom__eukaryota	0	0	0	0	0	0	0	0	0	0	0	0	0	0	0	0	0	0	0	0	0	0	0	0	0	0	0	0	0	0	0	0	1	0	0	0	0	19	0	0	1	0	0	0	0	0	1	0
Zotu267	___fj810171.1__gi:226346625_ ;k__fungi;p__basidiomycota;c__agaricomycetes;o__hymenochaetales;f__hymenochaetaceae;g__hymenochaete;s__hymenochaete adusta;subkingdom__dikarya;superkingdom__eukaryota	0	0	0	0	0	0	0	0	0	30	0	0	0	0	0	0	0	0	0	0	0	0	0	0	0	0	0	0	0	0	0	0	0	0	0	0	0	0	0	0	0	0	0	0	0	0	0	0
Zotu268	___fj852631.1__gi:226440794_ ;k__fungi;p__ascomycota;c__dothideomycetes;o__pleosporales;f__corynesporascaceae;g__corynespora;s__corynespora cassiicola;subclass pleosporomycetidae;subphylum__pezizomycotina;subkingdom__dikarya;superkingdom__eukaryota	0	0	0	0	0	0	0	5	0	1	0	0	0	0	0	0	0	0	0	0	0	0	0	0	3	0	0	0	0	0	0	2	0	0	0	0	0	0	0	0	0	0	0	0	0	0	0	0
Zotu269	___am269796.1__gi:158934585_ ;k__fungi;p__basidiomycota;c__agaricomycetes;o__hymenochaetales;f__hymenochaetaceae;g__fuscoporia;s__fuscoporia gilva;subkingdom__dikarya;superkingdom__eukaryota	0	0	0	0	0	0	0	0	0	0	0	0	0	0	0	0	0	0	0	0	0	0	0	0	0	0	0	0	0	0	0	0	0	0	0	0	0	0	0	0	0	0	0	0	0	0	0	0
Zotu270	___u85799.1__gi:4235186_ ;k__fungi;p__basidiomycota;c__agaricomycetes;o__atheliales;f__atheliaceae;g__athelia;s__athelia pellicularis;subclass agaricomycetidae;subkingdom__dikarya;superkingdom__eukaryota	0	0	0	0	0	0	0	0	0	0	0	0	0	0	8	0	0	0	0	0	0	0	0	0	0	0	0	0	0	0	0	0	0	0	0	0	0	0	0	6	0	0	0	0	0	0	0	0
Zotu271	___eu118651.1__gi:157057303_ ;k__fungi;p__basidiomycota;c__agaricomycetes;o__russulales;f__peniophoraceae;g__peniophora;s__peniophora pini;subkingdom__dikarya;superkingdom__eukaryota	0	0	0	0	0	0	0	0	0	0	0	0	14	0	0	0	0	0	0	0	0	0	0	0	0	0	0	0	0	0	0	0	0	0	0	0	0	0	0	0	0	0	0	0	0	0	0	0
Zotu272	sebacina vermifera ;k__fungi;p__basidiomycota;c__agaricomycetes;o__sebacinales;f__serendipitaceae;g__serendipita;s__sebacina vermifera; subphylum__agaricomycotina;subkingdom__dikarya;superkingdom__eukaryota;	23	0	0	0	0	0	0	0	0	0	0	0	0	0	0	0	0	0	0	0	0	0	0	0	0	0	0	0	0	0	0	0	0	0	0	0	0	0	0	0	0	0	0	0	0	0	0	0
Zotu273	___fj882040.1__gi:269969917_ ;k__fungi;p__basidiomycota;c__agaricomycetes;o__russulales;f__peniophoraceae;g__peniophora;s__peniophora laxitexta;subkingdom__dikarya;superkingdom__eukaryota	0	0	0	0	0	0	0	0	6	0	0	0	0	0	0	0	0	0	0	0	0	0	0	0	0	0	0	1	0	0	0	0	0	9	0	0	0	0	0	16	0	0	0	0	0	0	0	0
Zotu274	___hm536095.1__gi:317408930_ ;k__fungi;p__basidiomycota;c__agaricomycetes;o__gloeophyllales;f__polyporaceae;g__heliocybe;s__heliocybe sulcata; subphylum__agaricomycotina;subkingdom__dikarya;superkingdom__eukaryota;	0	0	0	0	0	0	0	0	0	0	0	0	0	0	0	0	0	0	0	0	0	0	0	0	0	0	0	0	0	0	0	0	0	0	0	0	0	0	0	0	0	0	0	0	0	0	0	0
Zotu275	___ay509551.1__gi:40846329_ ;k__fungi;p__basidiomycota;c__agaricomycetes;o__auriculariales;f__exidiaceae;g__ductifera;s__ductifera sucina;subkingdom__dikarya;superkingdom__eukaryota	0	0	0	0	0	0	0	0	0	0	0	0	0	0	0	0	0	0	0	0	0	0	0	0	0	0	0	0	0	0	0	0	0	0	0	0	0	0	0	0	0	0	0	0	0	0	0	0
Zotu276	___ab615456.1__gi:356995776_ ;k__fungi;p__basidiomycota;c__agaricomycetes;o__gloeophyllales;f__gloeophyllaceae;g__neolentinus;s__neolentinus lepideus;subkingdom__dikarya;superkingdom__eukaryota	0	0	0	0	0	0	0	0	0	0	0	0	0	0	0	0	0	0	0	1	0	0	0	0	12	0	0	0	0	0	0	0	0	0	0	0	0	0	0	0	0	0	0	0	0	0	0	0
Zotu277	___dq340326.1__gi:92110594_ ;k__fungi;p__basidiomycota;c__agaricomycetes;o__hymenochaetales;f__schizoporaceae;g__hyphodontia;s__hyphodontia sambuci; subphylum__agaricomycotina;subkingdom__dikarya;superkingdom__eukaryota;	0	0	0	0	0	0	0	0	0	0	0	0	0	0	0	0	0	0	0	0	0	0	0	0	0	6	0	0	0	0	0	0	0	0	0	0	0	0	0	0	0	0	0	0	0	0	0	0
Zotu279	___eu232219.1__gi:166361546_ ;k__fungi;p__basidiomycota;c__agaricomycetes;o__polyporales;f__polyporaceae;g__ganoderma;s__ganoderma applanatum; superkingdom__bacteria;species__candidatus gloeomargarita;superkingdom__bacteria;strain__candidatus gloeomargarita;species__candidatus gloeomargarita;superkingdom__bacteria;species__candidatus gloeomargarita;subfamily__melolonthinae;superfamily__scarabaeoi…	0	0	0	0	0	0	0	0	1	0	0	0	0	0	0	0	0	0	1	0	0	0	0	0	0	0	2	0	0	0	0	0	0	0	0	0	0	0	0	0	1	0	0	0	0	0	0	11
Zotu280	___ef175514.1__gi:140260205_ ;k__fungi;p__basidiomycota;c__agaricomycetes;o__agaricales;f__omphalotaceae;g__marasmiellus;s__marasmiellus candidus; subclass agaricomycetidae;subphylum__agaricomycotina;subkingdom__dikarya;superkingdom__eukaryota;	0	0	0	0	0	0	0	0	0	0	0	0	0	0	0	0	0	0	0	0	0	0	0	0	0	0	0	0	0	0	0	0	0	0	0	0	0	0	0	0	0	0	0	0	0	0	0	0
Zotu281	pyrofomes demidoffii ;k__fungi;p__basidiomycota;c__agaricomycetes;o__polyporales;f__polyporaceae;g__pyrofomes;s__pyrofomes demidoffii;subkingdom__dikarya;superkingdom__eukaryota	0	0	0	0	0	0	0	0	0	0	0	0	0	0	0	0	0	0	0	0	0	0	0	0	0	0	0	0	0	0	0	0	0	0	0	0	0	0	0	14	0	0	0	0	0	0	0	0
Zotu282	___ay129342.1__gi:27461740_ ;k__fungi;p__basidiomycota;c__agaricomycetes;o__agaricales;f__strophariaceae;g__psilocybe;s__psilocybe cubensis;subclass agaricomycetidae;subkingdom__dikarya;superkingdom__eukaryota	0	0	0	0	0	0	0	0	0	0	0	0	0	0	0	0	0	0	0	0	0	0	0	0	0	0	0	0	0	0	0	0	0	0	0	0	0	0	0	0	0	1	0	0	0	0	0	0
Zotu283	___af516601.1__gi:33325356_ ;k__fungi;p__basidiomycota;c__agaricomycetes;o__polyporales;f__polyporaceae;g__pseudofavolus;s__pseudofavolus cucullatus;subkingdom__dikarya;superkingdom__eukaryota	0	0	0	0	0	0	0	0	0	0	0	0	0	0	0	0	0	0	0	0	0	0	0	0	0	0	0	0	0	0	1	0	0	0	0	0	0	0	0	0	0	0	0	0	0	0	0	0
Zotu284	___fj381698.1__gi:228485056_ ;k__fungi;p__ascomycota;c__saccharomycetes;o__saccharomycetales;f__phaffomycetaceae;g__cyberlindnera;s__candida mycetangii;subphylum__saccharomycotina;subkingdom__dikarya;superkingdom__eukaryota	0	0	0	0	0	0	0	0	21	0	0	0	0	0	0	0	0	0	0	0	0	0	0	0	0	0	0	0	0	0	0	0	0	0	0	0	0	0	0	0	0	0	0	0	0	0	0	0
Zotu285	rhizoctonia solani ;k__fungi;p__basidiomycota;c__agaricomycetes;o__cantharellales;f__ceratobasidiaceae;g__rhizoctonia;s__rhizoctonia solani;subkingdom__dikarya;superkingdom__eukaryota	0	0	0	0	0	0	0	0	0	0	0	0	0	0	0	0	0	0	0	0	0	0	0	0	0	0	0	0	0	0	0	0	0	0	0	0	0	0	0	0	0	24	0	0	0	0	0	0
Zotu286	___af291284.1__gi:14334007_ ;k__fungi;p__basidiomycota;c__agaricomycetes;o__auriculariales;f__exidiaceae;g__heterochaete;s__heterochaete shearii;subkingdom__dikarya;superkingdom__eukaryota	0	0	0	0	0	0	0	0	0	0	0	0	0	0	0	0	0	0	0	0	0	0	0	0	0	0	0	0	0	0	0	0	0	0	0	0	0	0	0	1	0	0	0	0	0	0	0	16
Zotu287	___gq169764.1__gi:241912466_ ;k__fungi;p__ascomycota;c__dothideomycetes;o__pleosporales;f__phaeosphaeriaceae;g__phaeosphaeriopsis;s__phaeosphaeriopsis musae;suborder__pleosporineae;subclass pleosporomycetidae;subphylum__pezizomycotina;subkingdom__dikarya;superkingdom__eukaryota	0	0	0	0	0	0	0	0	0	0	0	0	0	0	0	0	0	0	0	0	0	0	0	0	0	0	0	0	0	0	0	0	0	0	0	0	0	0	0	0	14	0	1	0	0	0	0	0
Zotu288	___eu118622.1__gi:157057274_ ;k__fungi;p__basidiomycota;c__agaricomycetes;o__agaricales;f__cystostereaceae;g__cystidiodontia;s__cystidiodontia laminifera; subclass agaricomycetidae;subphylum__agaricomycotina;subkingdom__dikarya;superkingdom__eukaryota;	0	0	0	0	0	0	0	0	0	0	0	1	1	0	0	0	1	0	0	1	0	0	0	0	0	0	0	0	0	0	0	0	0	0	0	0	0	0	22	0	0	11	0	0	0	0	0	0
Zotu289	___fj430590.1__gi:238056460_ ;k__fungi;p__ascomycota;c__sordariomycetes;o__xylariales;f__xylariales;g__diatrypasimilis;s__diatrypasimilis australiensis;superkingdom__eukaryota;subkingdom__dikarya;subphylum__pezizomycotina;subclass xylariomycetidae	0	0	0	0	0	0	0	0	0	0	0	0	0	0	0	0	0	0	0	0	0	0	0	0	0	0	0	0	0	0	0	0	0	0	0	0	0	0	0	0	0	14	0	0	0	0	0	0
Zotu290	___af210819.1__gi:6563323_ ;k__fungi;p__basidiomycota;c__agaricomycetes;o__russulales;f__peniophoraceae;g__peniophora;s__peniophora aurantiaca;subkingdom__dikarya;superkingdom__eukaryota	0	0	0	0	0	0	0	0	0	0	0	0	0	0	0	13	0	0	0	0	0	0	0	0	0	0	0	0	0	0	0	0	0	0	0	0	0	0	0	0	0	0	0	0	0	0	0	0
Zotu291	___eu219559.1__gi:159024208_ ;k__fungi;p__ascomycota;c__sordariomycetes;o__hypocreales;f__nectriaceae;g__fusarium;s__fusarium oxysporum;subclass hypocreomycetidae;subphylum__pezizomycotina;subkingdom__dikarya;superkingdom__eukaryota	0	0	0	0	0	0	0	12	0	0	0	0	0	0	0	0	0	0	0	0	0	0	0	0	6	0	0	0	0	0	0	0	0	0	0	0	0	0	0	0	11	0	0	0	0	0	0	0
Zotu292	inocybe cf. rimosa tenn 062716 ;k__fungi;p__basidiomycota;c__agaricomycetes;o__agaricales;f__inocybaceae;g__inocybe;s__inocybe rimosa;subclass agaricomycetidae;subkingdom__dikarya;superkingdom__eukaryota	0	0	0	0	0	26	0	0	0	0	0	0	0	0	0	0	0	0	0	0	0	0	0	0	0	0	0	0	0	0	0	0	0	0	0	0	0	0	0	0	0	0	0	0	0	0	0	0
Zotu293	___ef175555.1__gi:140260246_ ;k__fungi;p__basidiomycota;c__agaricomycetes;o__agaricales;f__marasmiaceae;g__tetrapyrgos;s__tetrapyrgos subcinerea;subclass agaricomycetidae;subkingdom__dikarya;superkingdom__eukaryota	0	0	0	0	0	0	0	0	0	0	0	0	0	0	0	20	0	0	0	0	0	0	0	0	0	0	0	0	0	0	0	0	0	0	0	0	0	0	0	0	0	0	0	0	0	0	0	0
Zotu294	leptospora rubella ;k__fungi;p__ascomycota;c__dothideomycetes;o__dothideomycetes;f__dothideomycetes;g__leptospora;s__leptospora rubella;superkingdom__eukaryota;subkingdom__dikarya;subphylum__pezizomycotina	0	0	0	0	0	0	0	0	1	0	0	0	0	0	0	0	0	0	0	0	0	0	0	0	0	0	0	0	0	0	0	0	0	0	0	0	0	0	0	0	0	19	0	0	0	0	0	0
Zotu295	___ay854086.1__gi:57232720_ ;k__fungi;p__basidiomycota;c__agaricomycetes;o__polyporales;f__phanerochaetaceae;g__phanerochaete;s__phanerochaete chrysosporium;subkingdom__dikarya;superkingdom__eukaryota	0	0	11	0	0	0	0	0	0	0	0	0	0	0	0	0	0	0	0	0	0	0	0	0	0	0	0	0	0	0	0	0	0	0	0	0	0	0	0	0	0	0	0	0	0	0	0	0
Zotu296	___u68314.1__gi:3540222_ ;k__fungi;p__ascomycota;c__eurotiomycetes;o__onygenales;f__ascosphaeraceae;g__ascosphaera;s__ascosphaera atra;subclass eurotiomycetidae;subphylum__pezizomycotina;subkingdom__dikarya;superkingdom__eukaryota	0	0	0	0	0	0	0	0	0	0	3	17	0	0	0	0	0	0	0	0	0	0	0	0	0	0	0	0	0	0	0	0	0	0	0	0	0	0	0	0	0	0	0	0	0	0	0	0
Zotu297	___fj810171.1__gi:226346625_ ;k__fungi;p__basidiomycota;c__agaricomycetes;o__hymenochaetales;f__hymenochaetaceae;g__hymenochaete;s__hymenochaete adusta;subkingdom__dikarya;superkingdom__eukaryota	0	0	0	0	0	0	0	0	0	0	0	0	0	0	0	0	0	0	0	0	0	0	0	0	0	0	0	0	0	0	0	0	0	0	0	0	2	0	0	0	0	0	0	0	0	0	0	0
Zotu298	___hq441577.1__gi:332015805_ ;k__fungi;p__basidiomycota;c__agaricomycetes;o__auriculariales;f__auriculariales;g__oliveonia;s__oliveonia pauxilla;superkingdom__eukaryota;subkingdom__dikarya	0	0	0	0	0	0	0	0	0	0	0	0	0	0	0	0	0	0	0	0	0	0	0	1	0	0	0	0	0	0	0	0	0	0	0	0	0	0	0	0	0	0	0	0	0	0	17	0
Zotu299	___eu873528.1__gi:214014125_ ;k__fungi;p__ascomycota;c__sordariomycetes;o__sordariomycetes;f__sordariomycetes;g__dendroclathra;s__dendroclathra lignicola; subclass hypocreomycetidae;subphylum__pezizomycotina;subkingdom__dikarya;superkingdom__eukaryota;	0	0	0	0	0	0	14	0	0	0	0	0	0	0	0	0	0	0	0	0	0	0	0	0	0	0	0	0	0	0	0	0	0	0	0	0	0	0	0	0	0	0	0	0	0	0	0	0
Zotu300	___dq826737.1__gi:110951114_ ;k__fungi;p__ascomycota;c__eurotiomycetes;o__chaetothyriales;f__herpotrichiellaceae;g__capronia;s__capronia pilosella;subclass chaetothyriomycetidae;subphylum__pezizomycotina;subkingdom__dikarya;superkingdom__eukaryota	0	0	0	0	0	0	0	0	0	22	0	0	0	0	0	0	0	0	0	0	0	0	0	0	0	0	0	0	0	0	0	0	0	0	0	0	0	0	0	0	0	0	0	0	0	0	0	0
Zotu301	___jf440573.1__gi:328942601_ ;k__fungi;p__basidiomycota;c__agaricomycetes;o__russulales;f__peniophoraceae;g__peniophora;s__peniophora cinerea;subkingdom__dikarya;superkingdom__eukaryota	0	0	0	0	0	0	0	0	0	0	0	0	0	1	0	0	0	0	0	0	1	0	0	0	0	12	0	0	0	0	0	0	0	0	0	0	0	0	0	0	0	0	0	0	0	0	0	0
Zotu302	___hq608034.1__gi:312434512_ ;k__fungi;p__ascomycota;c__dothideomycetes;o__pleosporales;f__pleosporaceae;g__curvularia;s__cochliobolus australiensis;suborder__pleosporineae;subclass pleosporomycetidae;subphylum__pezizomycotina;subkingdom__dikarya;superkingdom__eukaryota	0	0	0	0	0	0	0	0	0	0	0	0	0	1	2	1	3	0	0	0	0	0	0	0	0	0	0	0	1	0	0	2	4	1	0	0	0	0	0	0	0	0	0	0	0	0	0	0
Zotu303	nigroporus vinosus ;k__fungi;p__basidiomycota;c__agaricomycetes;o__polyporales;f__steccherinaceae;g__nigroporus;s__nigroporus vinosus; subphylum__agaricomycotina;subkingdom__dikarya;superkingdom__eukaryota;	0	0	0	0	0	0	0	0	22	0	0	0	0	0	0	0	0	0	0	0	0	0	0	0	0	0	0	0	0	0	0	0	0	0	0	0	0	0	0	0	0	0	0	0	0	0	0	0
Zotu304	No hits found	0	0	19	0	0	0	0	0	0	0	0	0	0	0	0	0	0	0	0	0	0	0	0	0	0	0	0	0	0	0	0	0	0	0	0	0	0	0	0	0	0	0	0	0	0	0	0	0
Zotu305	___eu784176.1__gi:209870700_ ;k__fungi;p__basidiomycota;c__agaricomycetes;o__agaricales;f__physalacriaceae;g__armillaria;s__armillaria tabescens;subclass agaricomycetidae;subkingdom__dikarya;superkingdom__eukaryota	0	0	0	0	0	0	0	0	0	19	0	0	0	0	0	0	0	0	0	0	0	0	7	2	5	0	0	0	0	0	2	0	0	0	1	0	0	0	0	1	0	0	0	0	0	0	4	0
Zotu306	___eu232219.1__gi:166361546_ ;k__fungi;p__basidiomycota;c__agaricomycetes;o__polyporales;f__polyporaceae;g__ganoderma;s__ganoderma applanatum; superkingdom__bacteria;species__candidatus gloeomargarita;superkingdom__bacteria;strain__candidatus gloeomargarita;species__candidatus gloeomargarita;superkingdom__bacteria;species__candidatus gloeomargarita;subfamily__melolonthinae;superfamily__scarabaeoi…	0	0	0	0	0	0	0	0	0	0	0	0	0	0	0	1	0	0	0	0	0	0	0	0	0	0	0	0	0	0	0	0	0	0	0	0	0	0	0	0	0	0	0	0	0	0	0	0
Zotu307	No hits found	8	0	0	0	0	0	0	0	42	0	0	0	0	0	0	0	0	0	0	0	0	0	0	0	0	0	0	0	0	0	0	0	0	0	0	0	0	0	0	0	0	0	0	0	0	0	0	0
Zotu308	___jf907840.1__gi:344332799_ ;k__fungi;p__basidiomycota;c__agaricomycetes;o__agaricales;f__psathyrellaceae;g__coprinopsis;s__coprinopsis spilospora;subclass agaricomycetidae;subkingdom__dikarya;superkingdom__eukaryota	0	0	0	0	0	0	0	0	0	0	0	0	0	0	0	0	0	0	0	0	0	0	0	0	11	0	0	0	0	0	0	0	0	0	0	0	0	0	0	0	0	0	0	0	0	0	0	0
Zotu309	___gu214649.1__gi:284159062_ ;k__fungi;p__ascomycota;c__dothideomycetes;o__capnodiales;f__capnodiaceae;g__polychaeton;s__polychaeton citri;subclass dothideomycetidae;subphylum__pezizomycotina;subkingdom__dikarya;superkingdom__eukaryota	0	0	0	0	0	0	0	0	0	0	0	0	0	17	0	0	0	0	0	0	0	0	0	0	0	0	0	0	0	0	0	0	0	0	0	0	1	0	0	0	0	0	0	0	0	0	0	0
Zotu310	___ay952467.1__gi:63253673_ ;k__fungi;p__ascomycota;c__sordariomycetes;o__hypocreales;f__hypocreales;g__stilbella;s__stilbella fimetaria;superkingdom__eukaryota;subkingdom__dikarya;subphylum__pezizomycotina;subclass hypocreomycetidae	0	0	0	0	0	0	0	0	0	0	0	0	0	9	0	0	0	0	0	0	0	0	0	0	0	0	0	0	0	0	0	0	0	0	0	0	0	0	0	0	0	0	0	0	0	0	0	0
Zotu312	fuscoporia ferruginosa ;k__fungi;p__basidiomycota;c__agaricomycetes;o__hymenochaetales;f__hymenochaetaceae;g__fuscoporia;s__fuscoporia ferruginosa;subkingdom__dikarya;superkingdom__eukaryota	0	0	0	0	0	0	0	0	0	0	0	0	0	0	0	0	0	0	0	0	0	0	0	0	0	0	0	0	0	0	0	0	0	0	0	0	0	0	0	0	0	0	0	13	0	0	0	0
Zotu313	___ay256709.1__gi:32450888_ ;k__fungi;p__basidiomycota;c__agaricomycetes;o__agaricales;f__omphalotaceae;g__gymnopus;s__gymnopus luxurians; subclass agaricomycetidae;subphylum__agaricomycotina;subkingdom__dikarya;superkingdom__eukaryota;	5	0	0	0	0	0	0	6	0	19	0	0	0	0	0	0	0	0	0	1	0	0	0	0	0	0	0	0	0	0	0	0	0	0	0	0	0	0	0	0	1	0	0	0	0	0	0	0
Zotu314	___dq192178.1__gi:76152283_ ;k__fungi;p__basidiomycota;c__agaricomycetes;o__agaricales;f__porotheleaceae;g__clitocybula;s__clitocybula oculus;superkingdom__eukaryota;subkingdom__dikarya;subphylum__agaricomycotina;subclass agaricomycetidae;	0	0	0	0	0	0	0	0	0	0	0	0	0	0	0	0	0	0	0	0	0	0	0	0	0	0	0	0	0	0	0	0	0	0	0	0	0	0	0	0	21	0	0	0	0	0	0	0
Zotu315	___jf894110.1__gi:335893278_ ;k__fungi;p__basidiomycota;c__agaricomycetes;o__polyporales;f__polyporaceae;g__megasporoporia;s__megasporoporia setulosa; subphylum__agaricomycotina;subkingdom__dikarya;superkingdom__eukaryota;	0	0	0	0	0	0	0	0	0	0	0	0	0	0	0	0	0	0	0	0	0	0	0	0	0	0	0	0	0	0	0	0	0	0	1	0	0	0	0	2	2	5	0	0	0	0	0	5
Zotu316	___ab263119.1__gi:109452377_ ;k__fungi;p__basidiomycota;c__microbotryomycetes;o__sporidiobolales;f__sporidiobolaceae;g__rhodotorula;s__rhodotorula lamellibrachiae; subphylum__pucciniomycotina;subkingdom__dikarya;superkingdom__eukaryota;	0	0	0	0	0	0	0	0	0	0	0	0	0	0	0	0	0	3	7	4	2	11	7	3	8	0	2	3	2	5	3	4	3	0	1	3	2	0	0	0	0	0	0	0	0	0	0	0
Zotu317	___ef433562.1__gi:149364861_ ;k__fungi;p__basidiomycota;c__agaricomycetes;o__hymenochaetales;f__hymenochaetaceae;g__fomitiporia;s__fomitiporia dryophila;subkingdom__dikarya;superkingdom__eukaryota	0	0	0	0	0	0	0	0	0	0	0	0	0	0	0	0	0	0	0	0	0	0	0	0	0	0	0	0	0	0	0	0	0	0	0	0	0	0	0	0	0	0	0	0	0	0	0	0
Zotu318	___af210819.1__gi:6563323_ ;k__fungi;p__basidiomycota;c__agaricomycetes;o__russulales;f__peniophoraceae;g__peniophora;s__peniophora aurantiaca;subkingdom__dikarya;superkingdom__eukaryota	0	0	0	0	0	0	0	0	0	0	0	0	0	0	0	0	0	0	0	0	0	0	0	0	0	0	0	0	0	0	0	0	0	0	0	0	0	10	0	0	0	0	0	0	0	0	0	0
Zotu319	___jf908431.1__gi:344333388_ ;k__fungi;p__basidiomycota;c__agaricomycetes;o__agaricales;f__tricholomataceae;g__hemimycena;s__hemimycena ochrogaleata;subclass agaricomycetidae;subkingdom__dikarya;superkingdom__eukaryota	0	0	0	0	0	0	0	0	0	0	0	0	0	0	0	0	0	0	0	0	0	0	0	0	0	0	0	0	0	0	0	0	0	0	0	0	0	0	0	0	14	0	0	0	0	0	0	0
Zotu320	___af085492.1__gi:5880391_ ;k__fungi;p__basidiomycota;c__agaricomycetes;o__agaricales;f__amanitaceae;g__amanita;s__amanita tenuifolia;subclass agaricomycetidae;subkingdom__dikarya;superkingdom__eukaryota	0	0	0	0	0	12	0	0	0	0	0	0	0	0	0	0	0	0	0	0	0	0	0	0	0	0	0	0	0	0	1	0	0	0	0	0	0	0	0	1	0	0	0	6	0	0	0	0
Zotu321	___ef429240.1__gi:149208237_ ;k__fungi;p__basidiomycota;c__agaricomycetes;o__hymenochaetales;f__hymenochaetaceae;g__phellinus;s__phellinus punctatus;subkingdom__dikarya;superkingdom__eukaryota	0	0	0	0	0	0	0	0	0	31	0	0	0	0	0	0	0	0	0	0	0	0	0	0	0	0	0	0	0	0	0	0	0	0	0	0	0	0	0	0	0	0	0	0	0	0	0	0
Zotu322	___ay509551.1__gi:40846329_ ;k__fungi;p__basidiomycota;c__agaricomycetes;o__auriculariales;f__exidiaceae;g__ductifera;s__ductifera sucina;subkingdom__dikarya;superkingdom__eukaryota	0	0	0	0	0	0	0	0	0	0	0	0	0	0	0	0	0	0	0	2	0	0	0	0	0	0	0	0	0	0	0	0	0	0	0	0	0	0	0	0	0	0	0	9	0	0	0	0
Zotu323	___z95495.1__gi:3287273_ ;k__fungi;p__ascomycota;c__sordariomycetes;o__hypocreales;f__hypocreaceae;g__hypocrea;s__hypocrea ceramica;subclass hypocreomycetidae;subphylum__pezizomycotina;subkingdom__dikarya;superkingdom__eukaryota	0	0	0	0	0	0	1	0	0	0	0	0	0	0	0	0	1	0	0	0	0	0	0	0	0	0	0	0	0	0	0	0	0	0	0	0	0	0	0	0	0	0	0	0	0	0	0	0
Zotu324	___eu400587.1__gi:171466633_ ;k__fungi;p__basidiomycota;c__malasseziomycetes;o__malasseziales;f__malasseziaceae;g__malassezia;s__malassezia restricta;subphylum__ustilaginomycotina;subkingdom__dikarya;superkingdom__eukaryota	0	0	0	0	0	0	2	0	0	0	0	2	0	3	0	0	0	0	0	0	0	0	0	0	0	0	0	0	0	0	0	0	0	5	0	0	0	2	0	0	0	0	0	0	0	4	0	6
Zotu325	___ay681195.1__gi:56411539_ ;k__fungi;p__ascomycota;c__sordariomycetes;o__sordariales;f__sordariaceae;g__sordaria;s__sordaria tomento_alba;subclass sordariomycetidae;subphylum__pezizomycotina;subkingdom__dikarya;superkingdom__eukaryota	0	11	0	0	4	0	0	0	0	0	0	0	0	0	0	0	0	0	0	0	0	0	0	0	0	0	0	0	0	0	0	0	0	0	0	0	0	13	0	0	0	0	0	0	0	0	0	0
Zotu326	___hq650601.1__gi:336397014_ ;k__fungi;p__ascomycota;c__lecanoromycetes;o__ostropales;f__stictidaceae;g__stictis;s__stictis urceolatum;subclass ostropomycetidae;subphylum__pezizomycotina;subkingdom__dikarya;superkingdom__eukaryota	0	0	0	0	0	0	0	0	0	0	0	0	0	0	0	0	0	0	0	0	0	0	0	0	0	0	0	0	0	0	0	0	0	0	0	0	0	0	26	0	0	0	0	0	0	0	0	0
Zotu327	___hq607954.1__gi:312434432_ ;k__fungi;p__basidiomycota;c__agaricomycetes;o__polyporales;f__meruliaceae;g__phlebia;s__phlebia subserialis; subphylum__agaricomycotina;subkingdom__dikarya;superkingdom__eukaryota;	0	0	0	0	0	0	0	0	0	0	0	0	0	0	0	0	0	0	0	0	0	0	0	0	0	0	0	0	0	0	0	0	0	0	0	0	0	0	0	0	10	9	0	0	0	0	4	0
Zotu328	___gu214634.1__gi:284159047_ ;k__fungi;p__ascomycota;c__dothideomycetes;o__mycosphaerellales;f__teratosphaeriaceae;g__devriesia;s__devriesia lagerstroemiae; subclass dothideomycetidae;subphylum__pezizomycotina;subkingdom__dikarya;superkingdom__eukaryota;	0	0	0	0	0	0	0	0	0	0	0	9	0	0	0	0	4	0	0	0	0	0	0	0	0	0	0	0	0	0	0	0	0	0	0	0	0	0	0	0	0	0	0	0	0	0	0	0
Zotu329	___dq337383.1__gi:85001732_ ;k__fungi;p__ascomycota;c__dothideomycetes;o__pleosporales;f__pleosporaceae;g__bipolaris;s__cochliobolus sativus;suborder__pleosporineae;subclass pleosporomycetidae;subphylum__pezizomycotina;subkingdom__dikarya;superkingdom__eukaryota	0	0	0	0	0	0	0	19	0	0	0	0	0	0	0	0	0	0	0	0	0	0	0	0	0	0	0	0	0	0	0	0	0	0	0	0	0	0	0	0	0	0	0	0	0	0	0	0
Zotu330	___ay509555.1__gi:40846333_ ;k__fungi;p__basidiomycota;c__agaricomycetes;o__auriculariales;f__exidiaceae;g__exidia;s__exidia glandulosa;subkingdom__dikarya;superkingdom__eukaryota	0	0	0	0	0	0	0	0	0	0	0	0	0	0	0	5	0	0	0	0	0	0	0	0	0	0	0	0	0	0	0	0	0	0	0	0	0	0	4	0	0	0	0	0	0	0	0	4
Zotu331	___ay124130.1__gi:22530833_ ;k__fungi;p__ascomycota;c__lecanoromycetes;o__peltigerales;f__nephromataceae;g__nephroma;s__nephroma bellum;suborder__peltigerineae;subclass lecanoromycetidae;subphylum__pezizomycotina;subkingdom__dikarya;superkingdom__eukaryota	0	0	0	0	0	0	0	0	0	0	0	0	0	0	0	0	0	0	0	0	0	0	0	0	0	0	0	0	0	0	0	0	0	0	0	0	0	0	0	0	0	0	0	18	0	0	0	0
Zotu332	___ab263119.1__gi:109452377_ ;k__fungi;p__basidiomycota;c__microbotryomycetes;o__sporidiobolales;f__sporidiobolaceae;g__rhodotorula;s__rhodotorula lamellibrachiae; subphylum__pucciniomycotina;subkingdom__dikarya;superkingdom__eukaryota;	0	0	0	0	0	0	0	0	0	0	0	0	0	0	0	0	0	4	4	4	6	0	2	9	4	0	4	1	1	1	5	1	5	0	1	1	4	0	0	0	0	0	0	0	0	0	0	0
Blue rows - zOTUs with no hits
[truncated: 9 more columns]
